# Supplementary material for: Behavioral and physiological evidence that increasing group size ameliorates the impacts of social disturbance
Source: Oxford University Press journal article supplement (doi:10.1242/jeb.217075), 2020-06-12
Supplement: jeb217075supp.pdf [file jeb217075supp.pdf]

**Dataset 1.**

[Click here to Download Dataset 1](#)

**Table S1.** Post-hoc Comparisons for Dominance Index Analysis – Treatment×Timepoint×Group Size×Subject

| Group Size | Treatment | Subject         | Comparison |            |           |                 | Difference | SE       | t    | df       | Pbonferroni |       |
|------------|-----------|-----------------|------------|------------|-----------|-----------------|------------|----------|------|----------|-------------|-------|
|            |           |                 | Time Point | Group Size | Treatment | Subject         |            |          |      |          |             |       |
| Large      | Control   | Breeding Female | -0.1       | - Large    | Control   | Breeding Male   | -0.1       | -3.0833  | 5.19 | -0.59398 | 549         | 1.000 |
| Large      | Control   | Breeding Female | -0.1       | - Large    | Control   | Helpers         | -0.1       | 7.5211   | 5.19 | 1.44889  | 549         | 1.000 |
| Large      | Control   | Breeding Female | -0.1       | - Large    | Treatment | Breeding Male   | -0.1       | -9.3881  | 4.86 | -1.93024 | 538         | 1.000 |
| Large      | Control   | Breeding Female | -0.1       | - Large    | Treatment | Helpers         | -0.1       | 8.5516   | 4.86 | 1.75826  | 538         | 1.000 |
| Large      | Control   | Breeding Female | -0.1       | - Small    | Control   | Breeding Male   | -0.1       | -5.3333  | 5.20 | -1.02623 | 536         | 1.000 |
| Large      | Control   | Breeding Female | -0.1       | - Small    | Control   | Helpers         | -0.1       | 8.5694   | 5.20 | 1.64892  | 536         | 1.000 |
| Large      | Control   | Breeding Female | -0.1       | - Small    | Treatment | Breeding Male   | -0.1       | -1.3436  | 5.20 | -0.25835 | 539         | 1.000 |
| Large      | Control   | Breeding Female | -0.1       | - Small    | Treatment | Helpers         | -0.1       | 7.6772   | 5.20 | 1.47613  | 539         | 1.000 |
| Large      | Control   | Breeding Female | 0.1        | - Large    | Control   | Breeding Female | -0.1       | 5.0000   | 5.19 | 0.96322  | 549         | 1.000 |
| Large      | Control   | Breeding Female | 0.1        | - Large    | Control   | Breeding Male   | -0.1       | 1.9167   | 5.19 | 0.36923  | 549         | 1.000 |
| Large      | Control   | Breeding Female | 0.1        | - Large    | Control   | Breeding Male   | 0.1        | 0.7500   | 5.19 | 0.14448  | 549         | 1.000 |
| Large      | Control   | Breeding Female | 0.1        | - Large    | Control   | Helpers         | -0.1       | 12.5211  | 5.19 | 2.41211  | 549         | 1.000 |
| Large      | Control   | Breeding Female | 0.1        | - Large    | Control   | Helpers         | 0.1        | 13.5054  | 5.19 | 2.60171  | 549         | 1.000 |
| Large      | Control   | Breeding Female | 0.1        | - Large    | Treatment | Breeding Female | -0.1       | 1.1744   | 4.86 | 0.24146  | 538         | 1.000 |
| Large      | Control   | Breeding Female | 0.1        | - Large    | Treatment | Breeding Male   | -0.1       | -4.3881  | 4.86 | -0.90222 | 538         | 1.000 |
| Large      | Control   | Breeding Female | 0.1        | - Large    | Treatment | Breeding Male   | 0.1        | -7.8269  | 4.86 | -1.60948 | 538         | 1.000 |
| Large      | Control   | Breeding Female | 0.1        | - Large    | Treatment | Helpers         | -0.1       | 13.5516  | 4.86 | 2.78628  | 538         | 1.000 |
| Large      | Control   | Breeding Female | 0.1        | - Large    | Treatment | Helpers         | 0.1        | 14.0488  | 4.86 | 2.88889  | 538         | 1.000 |
| Large      | Control   | Breeding Female | 0.1        | - Small    | Control   | Breeding Female | -0.1       | 9.5000   | 5.20 | 1.82798  | 536         | 1.000 |
| Large      | Control   | Breeding Female | 0.1        | - Small    | Control   | Breeding Male   | -0.1       | -0.3333  | 5.20 | -0.06414 | 536         | 1.000 |
| Large      | Control   | Breeding Female | 0.1        | - Small    | Control   | Breeding Male   | 0.1        | -6.9167  | 5.20 | -1.33090 | 536         | 1.000 |
| Large      | Control   | Breeding Female | 0.1        | - Small    | Control   | Helpers         | -0.1       | 13.5694  | 5.20 | 2.61102  | 536         | 1.000 |
| Large      | Control   | Breeding Female | 0.1        | - Small    | Control   | Helpers         | 0.1        | 16.0625  | 5.20 | 3.09073  | 536         | 1.000 |
| Large      | Control   | Breeding Female | 0.1        | - Small    | Treatment | Breeding Female | -0.1       | 10.0730  | 5.20 | 1.93679  | 539         | 1.000 |
| Large      | Control   | Breeding Female | 0.1        | - Small    | Treatment | Breeding Male   | -0.1       | 3.6564   | 5.20 | 0.70303  | 539         | 1.000 |
| Large      | Control   | Breeding Female | 0.1        | - Small    | Treatment | Breeding Male   | 0.1        | -30.2585 | 5.20 | -5.81916 | 539         | <.001 |
| Large      | Control   | Breeding Female | 0.1        | - Small    | Treatment | Helpers         | -0.1       | 12.6772  | 5.20 | 2.43750  | 539         | 1.000 |
| Large      | Control   | Breeding Female | 0.1        | - Small    | Treatment | Helpers         | 0.1        | 19.5332  | 5.20 | 3.75651  | 539         | 0.216 |
| Large      | Control   | Breeding Female | 24         | - Large    | Control   | Breeding Female | -0.1       | 2.0833   | 5.19 | 0.40134  | 549         | 1.000 |
| Large      | Control   | Breeding Female | 24         | - Large    | Control   | Breeding Female | 0.1        | -2.9167  | 5.19 | -0.56188 | 549         | 1.000 |
| Large      | Control   | Breeding Female | 24         | - Large    | Control   | Breeding Female | 4          | 0.8333   | 5.19 | 0.16054  | 549         | 1.000 |
| Large      | Control   | Breeding Female | 24         | - Large    | Control   | Breeding Male   | -0.1       | -1.0000  | 5.19 | -0.19264 | 549         | 1.000 |
| Large      | Control   | Breeding Female | 24         | - Large    | Control   | Breeding Male   | 0.1        | -2.1667  | 5.19 | -0.41739 | 549         | 1.000 |
| Large      | Control   | Breeding Female | 24         | - Large    | Control   | Breeding Male   | 24         | 1.5833   | 5.19 | 0.30502  | 549         | 1.000 |

Post Hoc Comparisons - Group Size \* Treatment \* Subject \* Time Point

|            |           | Comparison      |            |            |           |           |                 |            |          |      |          |             |       |
|------------|-----------|-----------------|------------|------------|-----------|-----------|-----------------|------------|----------|------|----------|-------------|-------|
| Group Size | Treatment | Subject         | Time Point | Group Size | Treatment | Subject   | Time Point      | Difference | SE       | t    | df       | Pbonferroni |       |
| Large      | Control   | Breeding Female | 24         | -          | Large     | Control   | Breeding Male   | 4          | 1.5000   | 5.19 | 0.28896  | 549         | 1.000 |
| Large      | Control   | Breeding Female | 24         | -          | Large     | Control   | Helpers         | -0.1       | 9.6045   | 5.19 | 1.85023  | 549         | 1.000 |
| Large      | Control   | Breeding Female | 24         | -          | Large     | Control   | Helpers         | 0.1        | 10.5887  | 5.19 | 2.03984  | 549         | 1.000 |
| Large      | Control   | Breeding Female | 24         | -          | Large     | Control   | Helpers         | 24         | 9.4280   | 5.19 | 1.81623  | 549         | 1.000 |
| Large      | Control   | Breeding Female | 24         | -          | Large     | Control   | Helpers         | 4          | 9.3485   | 5.19 | 1.80093  | 549         | 1.000 |
| Large      | Control   | Breeding Female | 24         | -          | Large     | Treatment | Breeding Female | -0.1       | -1.7423  | 4.86 | -0.35822 | 538         | 1.000 |
| Large      | Control   | Breeding Female | 24         | -          | Large     | Treatment | Breeding Female | 0.1        | -1.4936  | 4.86 | -0.30714 | 538         | 1.000 |
| Large      | Control   | Breeding Female | 24         | -          | Large     | Treatment | Breeding Female | 4          | 14.3189  | 4.86 | 2.94443  | 538         | 1.000 |
| Large      | Control   | Breeding Female | 24         | -          | Large     | Treatment | Breeding Male   | -0.1       | -7.3048  | 4.86 | -1.50190 | 538         | 1.000 |
| Large      | Control   | Breeding Female | 24         | -          | Large     | Treatment | Breeding Male   | 0.1        | -10.7436 | 4.86 | -2.20924 | 538         | 1.000 |
| Large      | Control   | Breeding Female | 24         | -          | Large     | Treatment | Breeding Male   | 24         | -26.8061 | 4.86 | -5.51222 | 538         | <.001 |
| Large      | Control   | Breeding Female | 24         | -          | Large     | Treatment | Breeding Male   | 4          | -30.9936 | 4.86 | -6.37330 | 538         | <.001 |
| Large      | Control   | Breeding Female | 24         | -          | Large     | Treatment | Helpers         | -0.1       | 10.6350  | 4.86 | 2.18660  | 538         | 1.000 |
| Large      | Control   | Breeding Female | 24         | -          | Large     | Treatment | Helpers         | 0.1        | 11.1321  | 4.86 | 2.28913  | 538         | 1.000 |
| Large      | Control   | Breeding Female | 24         | -          | Large     | Treatment | Helpers         | 24         | 12.7277  | 4.86 | 2.61724  | 538         | 1.000 |
| Large      | Control   | Breeding Female | 24         | -          | Large     | Treatment | Helpers         | 4          | 11.6433  | 4.86 | 2.39424  | 538         | 1.000 |
| Large      | Control   | Breeding Female | 24         | -          | Small     | Control   | Breeding Female | -0.1       | 6.5833   | 5.20 | 1.26676  | 536         | 1.000 |
| Large      | Control   | Breeding Female | 24         | -          | Small     | Control   | Breeding Female | 0.1        | 3.9167   | 5.20 | 0.75364  | 536         | 1.000 |
| Large      | Control   | Breeding Female | 24         | -          | Small     | Control   | Breeding Female | 4          | 5.7500   | 5.20 | 1.10641  | 536         | 1.000 |
| Large      | Control   | Breeding Female | 24         | -          | Small     | Control   | Breeding Male   | -0.1       | -3.2500  | 5.20 | -0.62536 | 536         | 1.000 |
| Large      | Control   | Breeding Female | 24         | -          | Small     | Control   | Breeding Male   | 0.1        | -9.8333  | 5.20 | -1.89212 | 536         | 1.000 |
| Large      | Control   | Breeding Female | 24         | -          | Small     | Control   | Breeding Male   | 24         | -4.5833  | 5.20 | -0.88192 | 536         | 1.000 |
| Large      | Control   | Breeding Female | 24         | -          | Small     | Control   | Breeding Male   | 4          | -3.0833  | 5.20 | -0.59329 | 536         | 1.000 |
| Large      | Control   | Breeding Female | 24         | -          | Small     | Control   | Helpers         | -0.1       | 10.6528  | 5.20 | 2.04979  | 536         | 1.000 |
| Large      | Control   | Breeding Female | 24         | -          | Small     | Control   | Helpers         | 0.1        | 13.1458  | 5.20 | 2.52950  | 536         | 1.000 |
| Large      | Control   | Breeding Female | 24         | -          | Small     | Control   | Helpers         | 24         | 11.2153  | 5.20 | 2.15803  | 536         | 1.000 |
| Large      | Control   | Breeding Female | 24         | -          | Small     | Control   | Helpers         | 4          | 10.8403  | 5.20 | 2.08587  | 536         | 1.000 |
| Large      | Control   | Breeding Female | 24         | -          | Small     | Treatment | Breeding Female | -0.1       | 7.1564   | 5.20 | 1.37599  | 539         | 1.000 |
| Large      | Control   | Breeding Female | 24         | -          | Small     | Treatment | Breeding Female | 0.1        | 18.9082  | 5.20 | 3.63632  | 539         | 0.342 |
| Large      | Control   | Breeding Female | 24         | -          | Small     | Treatment | Breeding Female | 4          | 11.6582  | 5.20 | 2.24204  | 539         | 1.000 |
| Large      | Control   | Breeding Female | 24         | -          | Small     | Treatment | Breeding Male   | -0.1       | 0.7397   | 5.20 | 0.14223  | 539         | 1.000 |
| Large      | Control   | Breeding Female | 24         | -          | Small     | Treatment | Breeding Male   | 0.1        | -33.1752 | 5.20 | -6.38008 | 539         | <.001 |
| Large      | Control   | Breeding Female | 24         | -          | Small     | Treatment | Breeding Male   | 24         | -12.4252 | 5.20 | -2.38955 | 539         | 1.000 |
| Large      | Control   | Breeding Female | 24         | -          | Small     | Treatment | Breeding Male   | 4          | -10.2585 | 5.20 | -1.97286 | 539         | 1.000 |

Post Hoc Comparisons - Group Size \* Treatment \* Subject \* Time Point

|            |           | Comparison      |            |            |           |           |                 |      | Difference | SE   | t        | df  | Pbonferroni |
|------------|-----------|-----------------|------------|------------|-----------|-----------|-----------------|------|------------|------|----------|-----|-------------|
| Group Size | Treatment | Subject         | Time Point | Group Size | Treatment | Subject   | Time Point      |      |            |      |          |     |             |
| Large      | Control   | Breeding Female | 24         | -          | Small     | Treatment | Helpers         | -0.1 | 9.7605     | 5.20 | 1.87670  | 539 | 1.000       |
| Large      | Control   | Breeding Female | 24         | -          | Small     | Treatment | Helpers         | 0.1  | 16.6165    | 5.20 | 3.19560  | 539 | 1.000       |
| Large      | Control   | Breeding Female | 24         | -          | Small     | Treatment | Helpers         | 24   | 13.9915    | 5.20 | 2.69077  | 539 | 1.000       |
| Large      | Control   | Breeding Female | 24         | -          | Small     | Treatment | Helpers         | 4    | 12.3040    | 5.20 | 2.36624  | 539 | 1.000       |
| Large      | Control   | Breeding Female | 4          | -          | Large     | Control   | Breeding Female | -0.1 | 1.2500     | 5.19 | 0.24080  | 549 | 1.000       |
| Large      | Control   | Breeding Female | 4          | -          | Large     | Control   | Breeding Female | 0.1  | -3.7500    | 5.19 | -0.72241 | 549 | 1.000       |
| Large      | Control   | Breeding Female | 4          | -          | Large     | Control   | Breeding Male   | -0.1 | -1.8333    | 5.19 | -0.35318 | 549 | 1.000       |
| Large      | Control   | Breeding Female | 4          | -          | Large     | Control   | Breeding Male   | 0.1  | -3.0000    | 5.19 | -0.57793 | 549 | 1.000       |
| Large      | Control   | Breeding Female | 4          | -          | Large     | Control   | Breeding Male   | 4    | 0.6667     | 5.19 | 0.12843  | 549 | 1.000       |
| Large      | Control   | Breeding Female | 4          | -          | Large     | Control   | Helpers         | -0.1 | 8.7711     | 5.19 | 1.68970  | 549 | 1.000       |
| Large      | Control   | Breeding Female | 4          | -          | Large     | Control   | Helpers         | 0.1  | 9.7554     | 5.19 | 1.87930  | 549 | 1.000       |
| Large      | Control   | Breeding Female | 4          | -          | Large     | Control   | Helpers         | 4    | 8.5152     | 5.19 | 1.64039  | 549 | 1.000       |
| Large      | Control   | Breeding Female | 4          | -          | Large     | Treatment | Breeding Female | -0.1 | -2.5756    | 4.86 | -0.52956 | 538 | 1.000       |
| Large      | Control   | Breeding Female | 4          | -          | Large     | Treatment | Breeding Female | 0.1  | -2.3269    | 4.86 | -0.47850 | 538 | 1.000       |
| Large      | Control   | Breeding Female | 4          | -          | Large     | Treatment | Breeding Male   | -0.1 | -8.1381    | 4.86 | -1.67324 | 538 | 1.000       |
| Large      | Control   | Breeding Female | 4          | -          | Large     | Treatment | Breeding Male   | 0.1  | -11.5769   | 4.86 | -2.38060 | 538 | 1.000       |
| Large      | Control   | Breeding Female | 4          | -          | Large     | Treatment | Breeding Male   | 4    | -31.8269   | 4.86 | -6.54467 | 538 | <.001       |
| Large      | Control   | Breeding Female | 4          | -          | Large     | Treatment | Helpers         | -0.1 | 9.8016     | 4.86 | 2.01526  | 538 | 1.000       |
| Large      | Control   | Breeding Female | 4          | -          | Large     | Treatment | Helpers         | 0.1  | 10.2988    | 4.86 | 2.11777  | 538 | 1.000       |
| Large      | Control   | Breeding Female | 4          | -          | Large     | Treatment | Helpers         | 4    | 10.8100    | 4.86 | 2.22288  | 538 | 1.000       |
| Large      | Control   | Breeding Female | 4          | -          | Small     | Control   | Breeding Female | -0.1 | 5.7500     | 5.20 | 1.10641  | 536 | 1.000       |
| Large      | Control   | Breeding Female | 4          | -          | Small     | Control   | Breeding Female | 0.1  | 3.0833     | 5.20 | 0.59329  | 536 | 1.000       |
| Large      | Control   | Breeding Female | 4          | -          | Small     | Control   | Breeding Male   | -0.1 | -4.0833    | 5.20 | -0.78571 | 536 | 1.000       |
| Large      | Control   | Breeding Female | 4          | -          | Small     | Control   | Breeding Male   | 0.1  | -10.6667   | 5.20 | -2.05247 | 536 | 1.000       |
| Large      | Control   | Breeding Female | 4          | -          | Small     | Control   | Breeding Male   | 4    | -3.9167    | 5.20 | -0.75364 | 536 | 1.000       |
| Large      | Control   | Breeding Female | 4          | -          | Small     | Control   | Helpers         | -0.1 | 9.8194     | 5.20 | 1.88945  | 536 | 1.000       |
| Large      | Control   | Breeding Female | 4          | -          | Small     | Control   | Helpers         | 0.1  | 12.3125    | 5.20 | 2.36916  | 536 | 1.000       |
| Large      | Control   | Breeding Female | 4          | -          | Small     | Control   | Helpers         | 4    | 10.0069    | 5.20 | 1.92552  | 536 | 1.000       |
| Large      | Control   | Breeding Female | 4          | -          | Small     | Treatment | Breeding Female | -0.1 | 6.3230     | 5.20 | 1.21576  | 539 | 1.000       |
| Large      | Control   | Breeding Female | 4          | -          | Small     | Treatment | Breeding Female | 0.1  | 18.0748    | 5.20 | 3.47606  | 539 | 0.620       |
| Large      | Control   | Breeding Female | 4          | -          | Small     | Treatment | Breeding Male   | -0.1 | -0.0936    | 5.20 | -0.01800 | 539 | 1.000       |
| Large      | Control   | Breeding Female | 4          | -          | Small     | Treatment | Breeding Male   | 0.1  | -34.0085   | 5.20 | -6.54034 | 539 | <.001       |
| Large      | Control   | Breeding Female | 4          | -          | Small     | Treatment | Breeding Male   | 4    | -11.0918   | 5.20 | -2.13313 | 539 | 1.000       |
| Large      | Control   | Breeding Female | 4          | -          | Small     | Treatment | Helpers         | -0.1 | 8.9272     | 5.20 | 1.71647  | 539 | 1.000       |

Post Hoc Comparisons - Group Size \* Treatment \* Subject \* Time Point

| Comparison |           |                 |            |            |           |           |                 |            |         |      |          |             |       |
|------------|-----------|-----------------|------------|------------|-----------|-----------|-----------------|------------|---------|------|----------|-------------|-------|
| Group Size | Treatment | Subject         | Time Point | Group Size | Treatment | Subject   | Time Point      | Difference | SE      | t    | df       | Pbonferroni |       |
| Large      | Control   | Breeding Female | 4          | -          | Small     | Treatment | Helpers         | 0.1        | 15.7832 | 5.20 | 3.03533  | 539         | 1.000 |
| Large      | Control   | Breeding Female | 4          | -          | Small     | Treatment | Helpers         | 4          | 11.4707 | 5.20 | 2.20598  | 539         | 1.000 |
| Large      | Control   | Breeding Male   | -0.1       | -          | Large     | Control   | Helpers         | -0.1       | 10.6045 | 5.19 | 2.04288  | 549         | 1.000 |
| Large      | Control   | Breeding Male   | -0.1       | -          | Large     | Treatment | Helpers         | -0.1       | 11.6350 | 4.86 | 2.39221  | 538         | 1.000 |
| Large      | Control   | Breeding Male   | -0.1       | -          | Small     | Control   | Helpers         | -0.1       | 11.6528 | 5.20 | 2.24221  | 536         | 1.000 |
| Large      | Control   | Breeding Male   | -0.1       | -          | Small     | Treatment | Helpers         | -0.1       | 10.7605 | 5.20 | 2.06898  | 539         | 1.000 |
| Large      | Control   | Breeding Male   | 0.1        | -          | Large     | Control   | Breeding Female | -0.1       | 4.2500  | 5.19 | 0.81873  | 549         | 1.000 |
| Large      | Control   | Breeding Male   | 0.1        | -          | Large     | Control   | Breeding Male   | -0.1       | 1.1667  | 5.19 | 0.22475  | 549         | 1.000 |
| Large      | Control   | Breeding Male   | 0.1        | -          | Large     | Control   | Helpers         | -0.1       | 11.7711 | 5.19 | 2.26763  | 549         | 1.000 |
| Large      | Control   | Breeding Male   | 0.1        | -          | Large     | Control   | Helpers         | 0.1        | 12.7554 | 5.19 | 2.45723  | 549         | 1.000 |
| Large      | Control   | Breeding Male   | 0.1        | -          | Large     | Treatment | Breeding Female | -0.1       | 0.4244  | 4.86 | 0.08726  | 538         | 1.000 |
| Large      | Control   | Breeding Male   | 0.1        | -          | Large     | Treatment | Breeding Male   | -0.1       | -5.1381 | 4.86 | -1.05642 | 538         | 1.000 |
| Large      | Control   | Breeding Male   | 0.1        | -          | Large     | Treatment | Helpers         | -0.1       | 12.8016 | 4.86 | 2.63208  | 538         | 1.000 |
| Large      | Control   | Breeding Male   | 0.1        | -          | Large     | Treatment | Helpers         | 0.1        | 13.2988 | 4.86 | 2.73467  | 538         | 1.000 |
| Large      | Control   | Breeding Male   | 0.1        | -          | Small     | Control   | Breeding Female | -0.1       | 8.7500  | 5.20 | 1.68366  | 536         | 1.000 |
| Large      | Control   | Breeding Male   | 0.1        | -          | Small     | Control   | Breeding Male   | -0.1       | -1.0833 | 5.20 | -0.20845 | 536         | 1.000 |
| Large      | Control   | Breeding Male   | 0.1        | -          | Small     | Control   | Helpers         | -0.1       | 12.8194 | 5.20 | 2.46670  | 536         | 1.000 |
| Large      | Control   | Breeding Male   | 0.1        | -          | Small     | Control   | Helpers         | 0.1        | 15.3125 | 5.20 | 2.94641  | 536         | 1.000 |
| Large      | Control   | Breeding Male   | 0.1        | -          | Small     | Treatment | Breeding Female | -0.1       | 9.3230  | 5.20 | 1.79258  | 539         | 1.000 |
| Large      | Control   | Breeding Male   | 0.1        | -          | Small     | Treatment | Breeding Male   | -0.1       | 2.9064  | 5.20 | 0.55882  | 539         | 1.000 |
| Large      | Control   | Breeding Male   | 0.1        | -          | Small     | Treatment | Helpers         | -0.1       | 11.9272 | 5.20 | 2.29330  | 539         | 1.000 |
| Large      | Control   | Breeding Male   | 0.1        | -          | Small     | Treatment | Helpers         | 0.1        | 18.7832 | 5.20 | 3.61228  | 539         | 0.374 |
| Large      | Control   | Breeding Male   | 24         | -          | Large     | Control   | Breeding Female | -0.1       | 0.5000  | 5.19 | 0.09632  | 549         | 1.000 |
| Large      | Control   | Breeding Male   | 24         | -          | Large     | Control   | Breeding Female | 0.1        | -4.5000 | 5.19 | -0.86689 | 549         | 1.000 |
| Large      | Control   | Breeding Male   | 24         | -          | Large     | Control   | Breeding Female | 4          | -0.7500 | 5.19 | -0.14448 | 549         | 1.000 |
| Large      | Control   | Breeding Male   | 24         | -          | Large     | Control   | Breeding Male   | -0.1       | -2.5833 | 5.19 | -0.49766 | 549         | 1.000 |
| Large      | Control   | Breeding Male   | 24         | -          | Large     | Control   | Breeding Male   | 0.1        | -3.7500 | 5.19 | -0.72241 | 549         | 1.000 |
| Large      | Control   | Breeding Male   | 24         | -          | Large     | Control   | Breeding Male   | 4          | -0.0833 | 5.19 | -0.01605 | 549         | 1.000 |
| Large      | Control   | Breeding Male   | 24         | -          | Large     | Control   | Helpers         | -0.1       | 8.0211  | 5.19 | 1.54521  | 549         | 1.000 |
| Large      | Control   | Breeding Male   | 24         | -          | Large     | Control   | Helpers         | 0.1        | 9.0054  | 5.19 | 1.73482  | 549         | 1.000 |
| Large      | Control   | Breeding Male   | 24         | -          | Large     | Control   | Helpers         | 24         | 7.8446  | 5.19 | 1.51122  | 549         | 1.000 |
| Large      | Control   | Breeding Male   | 24         | -          | Large     | Control   | Helpers         | 4          | 7.7652  | 5.19 | 1.49591  | 549         | 1.000 |
| Large      | Control   | Breeding Male   | 24         | -          | Large     | Treatment | Breeding Female | -0.1       | -3.3256 | 4.86 | -0.68376 | 538         | 1.000 |
| Large      | Control   | Breeding Male   | 24         | -          | Large     | Treatment | Breeding Female | 0.1        | -3.0769 | 4.86 | -0.63272 | 538         | 1.000 |

Post Hoc Comparisons - Group Size \* Treatment \* Subject \* Time Point

|            |           |               |            | Comparison |           |           |                 | Difference | SE       | t    | df       | Pbonferroni |       |
|------------|-----------|---------------|------------|------------|-----------|-----------|-----------------|------------|----------|------|----------|-------------|-------|
| Group Size | Treatment | Subject       | Time Point | Group Size | Treatment | Subject   | Time Point      |            |          |      |          |             |       |
| Large      | Control   | Breeding Male | 24         | -          | Large     | Treatment | Breeding Female | 4          | 12.7356  | 4.86 | 2.61885  | 538         | 1.000 |
| Large      | Control   | Breeding Male | 24         | -          | Large     | Treatment | Breeding Male   | -0.1       | -8.8881  | 4.86 | -1.82744 | 538         | 1.000 |
| Large      | Control   | Breeding Male | 24         | -          | Large     | Treatment | Breeding Male   | 0.1        | -12.3269 | 4.86 | -2.53483 | 538         | 1.000 |
| Large      | Control   | Breeding Male | 24         | -          | Large     | Treatment | Breeding Male   | 4          | -32.5769 | 4.86 | -6.69889 | 538         | <.001 |
| Large      | Control   | Breeding Male | 24         | -          | Large     | Treatment | Helpers         | -0.1       | 9.0516   | 4.86 | 1.86106  | 538         | 1.000 |
| Large      | Control   | Breeding Male | 24         | -          | Large     | Treatment | Helpers         | 0.1        | 9.5488   | 4.86 | 1.96355  | 538         | 1.000 |
| Large      | Control   | Breeding Male | 24         | -          | Large     | Treatment | Helpers         | 24         | 11.1444  | 4.86 | 2.29166  | 538         | 1.000 |
| Large      | Control   | Breeding Male | 24         | -          | Large     | Treatment | Helpers         | 4          | 10.0600  | 4.86 | 2.06866  | 538         | 1.000 |
| Large      | Control   | Breeding Male | 24         | -          | Small     | Control   | Breeding Female | -0.1       | 5.0000   | 5.20 | 0.96209  | 536         | 1.000 |
| Large      | Control   | Breeding Male | 24         | -          | Small     | Control   | Breeding Female | 0.1        | 2.3333   | 5.20 | 0.44898  | 536         | 1.000 |
| Large      | Control   | Breeding Male | 24         | -          | Small     | Control   | Breeding Female | 4          | 4.1667   | 5.20 | 0.80174  | 536         | 1.000 |
| Large      | Control   | Breeding Male | 24         | -          | Small     | Control   | Breeding Male   | -0.1       | -4.8333  | 5.20 | -0.93002 | 536         | 1.000 |
| Large      | Control   | Breeding Male | 24         | -          | Small     | Control   | Breeding Male   | 0.1        | -11.4167 | 5.20 | -2.19678 | 536         | 1.000 |
| Large      | Control   | Breeding Male | 24         | -          | Small     | Control   | Breeding Male   | 4          | -4.6667  | 5.20 | -0.89795 | 536         | 1.000 |
| Large      | Control   | Breeding Male | 24         | -          | Small     | Control   | Helpers         | -0.1       | 9.0694   | 5.20 | 1.74513  | 536         | 1.000 |
| Large      | Control   | Breeding Male | 24         | -          | Small     | Control   | Helpers         | 0.1        | 11.5625  | 5.20 | 2.22484  | 536         | 1.000 |
| Large      | Control   | Breeding Male | 24         | -          | Small     | Control   | Helpers         | 24         | 9.6319   | 5.20 | 1.85337  | 536         | 1.000 |
| Large      | Control   | Breeding Male | 24         | -          | Small     | Control   | Helpers         | 4          | 9.2569   | 5.20 | 1.78121  | 536         | 1.000 |
| Large      | Control   | Breeding Male | 24         | -          | Small     | Treatment | Breeding Female | -0.1       | 5.5730   | 5.20 | 1.07155  | 539         | 1.000 |
| Large      | Control   | Breeding Male | 24         | -          | Small     | Treatment | Breeding Female | 0.1        | 17.3248  | 5.20 | 3.33182  | 539         | 1.000 |
| Large      | Control   | Breeding Male | 24         | -          | Small     | Treatment | Breeding Female | 4          | 10.0748  | 5.20 | 1.93754  | 539         | 1.000 |
| Large      | Control   | Breeding Male | 24         | -          | Small     | Treatment | Breeding Male   | -0.1       | -0.8436  | 5.20 | -0.16221 | 539         | 1.000 |
| Large      | Control   | Breeding Male | 24         | -          | Small     | Treatment | Breeding Male   | 0.1        | -34.7585 | 5.20 | -6.68458 | 539         | <.001 |
| Large      | Control   | Breeding Male | 24         | -          | Small     | Treatment | Breeding Male   | 4          | -11.8418 | 5.20 | -2.27736 | 539         | 1.000 |
| Large      | Control   | Breeding Male | 24         | -          | Small     | Treatment | Helpers         | -0.1       | 8.1772   | 5.20 | 1.57227  | 539         | 1.000 |
| Large      | Control   | Breeding Male | 24         | -          | Small     | Treatment | Helpers         | 0.1        | 15.0332  | 5.20 | 2.89110  | 539         | 1.000 |
| Large      | Control   | Breeding Male | 24         | -          | Small     | Treatment | Helpers         | 24         | 12.4082  | 5.20 | 2.38627  | 539         | 1.000 |
| Large      | Control   | Breeding Male | 24         | -          | Small     | Treatment | Helpers         | 4          | 10.7207  | 5.20 | 2.06174  | 539         | 1.000 |
| Large      | Control   | Breeding Male | 4          | -          | Large     | Control   | Breeding Female | -0.1       | 0.5833   | 5.19 | 0.11238  | 549         | 1.000 |
| Large      | Control   | Breeding Male | 4          | -          | Large     | Control   | Breeding Female | 0.1        | -4.4167  | 5.19 | -0.85084 | 549         | 1.000 |
| Large      | Control   | Breeding Male | 4          | -          | Large     | Control   | Breeding Male   | -0.1       | -2.5000  | 5.19 | -0.48161 | 549         | 1.000 |
| Large      | Control   | Breeding Male | 4          | -          | Large     | Control   | Breeding Male   | 0.1        | -3.6667  | 5.19 | -0.70636 | 549         | 1.000 |
| Large      | Control   | Breeding Male | 4          | -          | Large     | Control   | Helpers         | -0.1       | 8.1045   | 5.19 | 1.56127  | 549         | 1.000 |
| Large      | Control   | Breeding Male | 4          | -          | Large     | Control   | Helpers         | 0.1        | 9.0887   | 5.19 | 1.75087  | 549         | 1.000 |

Post Hoc Comparisons - Group Size \* Treatment \* Subject \* Time Point

| Comparison |           |               |            |            |           |           |                 |            |          |      |          |             |       |
|------------|-----------|---------------|------------|------------|-----------|-----------|-----------------|------------|----------|------|----------|-------------|-------|
| Group Size | Treatment | Subject       | Time Point | Group Size | Treatment | Subject   | Time Point      | Difference | SE       | t    | df       | Pbonferroni |       |
| Large      | Control   | Breeding Male | 4          | -          | Large     | Control   | Helpers         | 4          | 7.8485   | 5.19 | 1.51196  | 549         | 1.000 |
| Large      | Control   | Breeding Male | 4          | -          | Large     | Treatment | Breeding Female | -0.1       | -3.2423  | 4.86 | -0.66663 | 538         | 1.000 |
| Large      | Control   | Breeding Male | 4          | -          | Large     | Treatment | Breeding Female | 0.1        | -2.9936  | 4.86 | -0.61559 | 538         | 1.000 |
| Large      | Control   | Breeding Male | 4          | -          | Large     | Treatment | Breeding Male   | -0.1       | -8.8048  | 4.86 | -1.81031 | 538         | 1.000 |
| Large      | Control   | Breeding Male | 4          | -          | Large     | Treatment | Breeding Male   | 0.1        | -12.2436 | 4.86 | -2.51769 | 538         | 1.000 |
| Large      | Control   | Breeding Male | 4          | -          | Large     | Treatment | Helpers         | -0.1       | 9.1350   | 4.86 | 1.87819  | 538         | 1.000 |
| Large      | Control   | Breeding Male | 4          | -          | Large     | Treatment | Helpers         | 0.1        | 9.6321   | 4.86 | 1.98068  | 538         | 1.000 |
| Large      | Control   | Breeding Male | 4          | -          | Large     | Treatment | Helpers         | 4          | 10.1433  | 4.86 | 2.08579  | 538         | 1.000 |
| Large      | Control   | Breeding Male | 4          | -          | Small     | Control   | Breeding Female | -0.1       | 5.0833   | 5.20 | 0.97813  | 536         | 1.000 |
| Large      | Control   | Breeding Male | 4          | -          | Small     | Control   | Breeding Female | 0.1        | 2.4167   | 5.20 | 0.46501  | 536         | 1.000 |
| Large      | Control   | Breeding Male | 4          | -          | Small     | Control   | Breeding Male   | -0.1       | -4.7500  | 5.20 | -0.91399 | 536         | 1.000 |
| Large      | Control   | Breeding Male | 4          | -          | Small     | Control   | Breeding Male   | 0.1        | -11.3333 | 5.20 | -2.18075 | 536         | 1.000 |
| Large      | Control   | Breeding Male | 4          | -          | Small     | Control   | Helpers         | -0.1       | 9.1528   | 5.20 | 1.76117  | 536         | 1.000 |
| Large      | Control   | Breeding Male | 4          | -          | Small     | Control   | Helpers         | 0.1        | 11.6458  | 5.20 | 2.24088  | 536         | 1.000 |
| Large      | Control   | Breeding Male | 4          | -          | Small     | Control   | Helpers         | 4          | 9.3403   | 5.20 | 1.79724  | 536         | 1.000 |
| Large      | Control   | Breeding Male | 4          | -          | Small     | Treatment | Breeding Female | -0.1       | 5.6564   | 5.20 | 1.08758  | 539         | 1.000 |
| Large      | Control   | Breeding Male | 4          | -          | Small     | Treatment | Breeding Female | 0.1        | 17.4082  | 5.20 | 3.34785  | 539         | 0.983 |
| Large      | Control   | Breeding Male | 4          | -          | Small     | Treatment | Breeding Male   | -0.1       | -0.7603  | 5.20 | -0.14619 | 539         | 1.000 |
| Large      | Control   | Breeding Male | 4          | -          | Small     | Treatment | Breeding Male   | 0.1        | -34.6752 | 5.20 | -6.66855 | 539         | <.001 |
| Large      | Control   | Breeding Male | 4          | -          | Small     | Treatment | Helpers         | -0.1       | 8.2605   | 5.20 | 1.58829  | 539         | 1.000 |
| Large      | Control   | Breeding Male | 4          | -          | Small     | Treatment | Helpers         | 0.1        | 15.1165  | 5.20 | 2.90712  | 539         | 1.000 |
| Large      | Control   | Breeding Male | 4          | -          | Small     | Treatment | Helpers         | 4          | 10.8040  | 5.20 | 2.07777  | 539         | 1.000 |
| Large      | Control   | Helpers       | 0.1        | -          | Large     | Control   | Breeding Female | -0.1       | -8.5054  | 5.19 | -1.63850 | 549         | 1.000 |
| Large      | Control   | Helpers       | 0.1        | -          | Large     | Control   | Breeding Male   | -0.1       | -11.5887 | 5.19 | -2.23248 | 549         | 1.000 |
| Large      | Control   | Helpers       | 0.1        | -          | Large     | Control   | Helpers         | -0.1       | -0.9842  | 5.19 | -0.18960 | 549         | 1.000 |
| Large      | Control   | Helpers       | 0.1        | -          | Large     | Treatment | Breeding Female | -0.1       | -12.3310 | 4.86 | -2.53531 | 538         | 1.000 |
| Large      | Control   | Helpers       | 0.1        | -          | Large     | Treatment | Breeding Male   | -0.1       | -17.8935 | 4.86 | -3.67899 | 538         | 0.291 |
| Large      | Control   | Helpers       | 0.1        | -          | Large     | Treatment | Helpers         | -0.1       | 0.0463   | 4.86 | 0.00951  | 538         | 1.000 |
| Large      | Control   | Helpers       | 0.1        | -          | Small     | Control   | Breeding Female | -0.1       | -4.0054  | 5.20 | -0.77071 | 536         | 1.000 |
| Large      | Control   | Helpers       | 0.1        | -          | Small     | Control   | Breeding Male   | -0.1       | -13.8387 | 5.20 | -2.66282 | 536         | 1.000 |
| Large      | Control   | Helpers       | 0.1        | -          | Small     | Control   | Helpers         | -0.1       | 0.0641   | 5.20 | 0.01233  | 536         | 1.000 |
| Large      | Control   | Helpers       | 0.1        | -          | Small     | Treatment | Breeding Female | -0.1       | -3.4323  | 5.20 | -0.65995 | 539         | 1.000 |
| Large      | Control   | Helpers       | 0.1        | -          | Small     | Treatment | Breeding Male   | -0.1       | -9.8490  | 5.20 | -1.89371 | 539         | 1.000 |
| Large      | Control   | Helpers       | 0.1        | -          | Small     | Treatment | Helpers         | -0.1       | -0.8282  | 5.20 | -0.15923 | 539         | 1.000 |
| Large      | Control   | Helpers       | 24         | -          | Large     | Control   | Breeding Female | -0.1       | -7.3446  | 5.19 | -1.41489 | 549         | 1.000 |
| Large      | Control   | Helpers       | 24         | -          | Large     | Control   | Breeding Female | 0.1        | -12.3446 | 5.19 | -2.37811 | 549         | 1.000 |

Post Hoc Comparisons - Group Size \* Treatment \* Subject \* Time Point

|            |           |         |            | Comparison |           |           |                 | Difference | SE       | t    | df       | Pbonferroni |       |
|------------|-----------|---------|------------|------------|-----------|-----------|-----------------|------------|----------|------|----------|-------------|-------|
| Group Size | Treatment | Subject | Time Point | Group Size | Treatment | Subject   | Time Point      |            |          |      |          |             |       |
| Large      | Control   | Helpers | 24         | -          | Large     | Control   | Breeding Female | 4          | -8.5946  | 5.19 | -1.65570 | 549         | 1.000 |
| Large      | Control   | Helpers | 24         | -          | Large     | Control   | Breeding Male   | -0.1       | -10.4280 | 5.19 | -2.00888 | 549         | 1.000 |
| Large      | Control   | Helpers | 24         | -          | Large     | Control   | Breeding Male   | 0.1        | -11.5946 | 5.19 | -2.23363 | 549         | 1.000 |
| Large      | Control   | Helpers | 24         | -          | Large     | Control   | Breeding Male   | 4          | -7.9280  | 5.19 | -1.52727 | 549         | 1.000 |
| Large      | Control   | Helpers | 24         | -          | Large     | Control   | Helpers         | -0.1       | 0.1765   | 5.19 | 0.03400  | 549         | 1.000 |
| Large      | Control   | Helpers | 24         | -          | Large     | Control   | Helpers         | 0.1        | 1.1607   | 5.19 | 0.22360  | 549         | 1.000 |
| Large      | Control   | Helpers | 24         | -          | Large     | Control   | Helpers         | 4          | -0.0795  | 5.19 | -0.01531 | 549         | 1.000 |
| Large      | Control   | Helpers | 24         | -          | Large     | Treatment | Breeding Female | -0.1       | -11.1703 | 4.86 | -2.29666 | 538         | 1.000 |
| Large      | Control   | Helpers | 24         | -          | Large     | Treatment | Breeding Female | 0.1        | -10.9216 | 4.86 | -2.24584 | 538         | 1.000 |
| Large      | Control   | Helpers | 24         | -          | Large     | Treatment | Breeding Female | 4          | 4.8909   | 4.86 | 1.00573  | 538         | 1.000 |
| Large      | Control   | Helpers | 24         | -          | Large     | Treatment | Breeding Male   | -0.1       | -16.7328 | 4.86 | -3.44034 | 538         | 0.706 |
| Large      | Control   | Helpers | 24         | -          | Large     | Treatment | Breeding Male   | 0.1        | -20.1716 | 4.86 | -4.14794 | 538         | 0.044 |
| Large      | Control   | Helpers | 24         | -          | Large     | Treatment | Breeding Male   | 4          | -40.4216 | 4.86 | -8.31201 | 538         | <.001 |
| Large      | Control   | Helpers | 24         | -          | Large     | Treatment | Helpers         | -0.1       | 1.2070   | 4.86 | 0.24816  | 538         | 1.000 |
| Large      | Control   | Helpers | 24         | -          | Large     | Treatment | Helpers         | 0.1        | 1.7042   | 4.86 | 0.35043  | 538         | 1.000 |
| Large      | Control   | Helpers | 24         | -          | Large     | Treatment | Helpers         | 4          | 2.2153   | 4.86 | 0.45554  | 538         | 1.000 |
| Large      | Control   | Helpers | 24         | -          | Small     | Control   | Breeding Female | -0.1       | -2.8446  | 5.20 | -0.54736 | 536         | 1.000 |
| Large      | Control   | Helpers | 24         | -          | Small     | Control   | Breeding Female | 0.1        | -5.5113  | 5.20 | -1.06048 | 536         | 1.000 |
| Large      | Control   | Helpers | 24         | -          | Small     | Control   | Breeding Female | 4          | -3.6780  | 5.20 | -0.70771 | 536         | 1.000 |
| Large      | Control   | Helpers | 24         | -          | Small     | Control   | Breeding Male   | -0.1       | -12.6780 | 5.20 | -2.43948 | 536         | 1.000 |
| Large      | Control   | Helpers | 24         | -          | Small     | Control   | Breeding Male   | 0.1        | -19.2613 | 5.20 | -3.70624 | 536         | 0.262 |
| Large      | Control   | Helpers | 24         | -          | Small     | Control   | Breeding Male   | 4          | -12.5113 | 5.20 | -2.40741 | 536         | 1.000 |
| Large      | Control   | Helpers | 24         | -          | Small     | Control   | Helpers         | -0.1       | 1.2248   | 5.20 | 0.23567  | 536         | 1.000 |
| Large      | Control   | Helpers | 24         | -          | Small     | Control   | Helpers         | 0.1        | 3.7179   | 5.20 | 0.71539  | 536         | 1.000 |
| Large      | Control   | Helpers | 24         | -          | Small     | Control   | Helpers         | 4          | 1.4123   | 5.20 | 0.27175  | 536         | 1.000 |
| Large      | Control   | Helpers | 24         | -          | Small     | Treatment | Breeding Female | -0.1       | -2.2716  | 5.20 | -0.43677 | 539         | 1.000 |
| Large      | Control   | Helpers | 24         | -          | Small     | Treatment | Breeding Female | 0.1        | 9.4802   | 5.20 | 1.82318  | 539         | 1.000 |
| Large      | Control   | Helpers | 24         | -          | Small     | Treatment | Breeding Female | 4          | 2.2302   | 5.20 | 0.42890  | 539         | 1.000 |
| Large      | Control   | Helpers | 24         | -          | Small     | Treatment | Breeding Male   | -0.1       | -8.6883  | 5.20 | -1.67053 | 539         | 1.000 |
| Large      | Control   | Helpers | 24         | -          | Small     | Treatment | Breeding Male   | 0.1        | -42.6032 | 5.20 | -8.19322 | 539         | <.001 |
| Large      | Control   | Helpers | 24         | -          | Small     | Treatment | Breeding Male   | 4          | -19.6865 | 5.20 | -3.78600 | 539         | 0.192 |
| Large      | Control   | Helpers | 24         | -          | Small     | Treatment | Helpers         | -0.1       | 0.3326   | 5.20 | 0.06394  | 539         | 1.000 |
| Large      | Control   | Helpers | 24         | -          | Small     | Treatment | Helpers         | 0.1        | 7.1885   | 5.20 | 1.38246  | 539         | 1.000 |
| Large      | Control   | Helpers | 24         | -          | Small     | Treatment | Helpers         | 4          | 2.8760   | 5.20 | 0.55310  | 539         | 1.000 |
| Large      | Control   | Helpers | 4          | -          | Large     | Control   | Breeding Female | -0.1       | -7.2652  | 5.19 | -1.39959 | 549         | 1.000 |
| Large      | Control   | Helpers | 4          | -          | Large     | Control   | Breeding Female | 0.1        | -12.2652 | 5.19 | -2.36280 | 549         | 1.000 |
| Large      | Control   | Helpers | 4          | -          | Large     | Control   | Breeding Male   | -0.1       | -10.3485 | 5.19 | -1.99357 | 549         | 1.000 |
| Large      | Control   | Helpers | 4          | -          | Large     | Control   | Breeding Male   | 0.1        | -11.5152 | 5.19 | -2.21832 | 549         | 1.000 |
| Large      | Control   | Helpers | 4          | -          | Large     | Control   | Helpers         | -0.1       | 0.2560   | 5.19 | 0.04931  | 549         | 1.000 |
| Large      | Control   | Helpers | 4          | -          | Large     | Control   | Helpers         | 0.1        | 1.2402   | 5.19 | 0.23891  | 549         | 1.000 |

Post Hoc Comparisons - Group Size \* Treatment \* Subject \* Time Point

|            |           |                 |            | Comparison |           |           |                 | Difference | SE       | t    | df       | Pbonferroni |       |
|------------|-----------|-----------------|------------|------------|-----------|-----------|-----------------|------------|----------|------|----------|-------------|-------|
| Group Size | Treatment | Subject         | Time Point | Group Size | Treatment | Subject   | Time Point      |            |          |      |          |             |       |
| Large      | Control   | Helpers         | 4          | -          | Large     | Treatment | Breeding Female | -0.1       | -11.0908 | 4.86 | -2.28032 | 538         | 1.000 |
| Large      | Control   | Helpers         | 4          | -          | Large     | Treatment | Breeding Female | 0.1        | -10.8421 | 4.86 | -2.22950 | 538         | 1.000 |
| Large      | Control   | Helpers         | 4          | -          | Large     | Treatment | Breeding Male   | -0.1       | -16.6533 | 4.86 | -3.42400 | 538         | 0.749 |
| Large      | Control   | Helpers         | 4          | -          | Large     | Treatment | Breeding Male   | 0.1        | -20.0921 | 4.86 | -4.13160 | 538         | 0.047 |
| Large      | Control   | Helpers         | 4          | -          | Large     | Treatment | Helpers         | -0.1       | 1.2864   | 4.86 | 0.26450  | 538         | 1.000 |
| Large      | Control   | Helpers         | 4          | -          | Large     | Treatment | Helpers         | 0.1        | 1.7836   | 4.86 | 0.36677  | 538         | 1.000 |
| Large      | Control   | Helpers         | 4          | -          | Small     | Control   | Breeding Female | -0.1       | -2.7652  | 5.20 | -0.53207 | 536         | 1.000 |
| Large      | Control   | Helpers         | 4          | -          | Small     | Control   | Breeding Female | 0.1        | -5.4318  | 5.20 | -1.04519 | 536         | 1.000 |
| Large      | Control   | Helpers         | 4          | -          | Small     | Control   | Breeding Male   | -0.1       | -12.5985 | 5.20 | -2.42419 | 536         | 1.000 |
| Large      | Control   | Helpers         | 4          | -          | Small     | Control   | Breeding Male   | 0.1        | -19.1818 | 5.20 | -3.69095 | 536         | 0.278 |
| Large      | Control   | Helpers         | 4          | -          | Small     | Control   | Helpers         | -0.1       | 1.3043   | 5.20 | 0.25097  | 536         | 1.000 |
| Large      | Control   | Helpers         | 4          | -          | Small     | Control   | Helpers         | 0.1        | 3.7973   | 5.20 | 0.73068  | 536         | 1.000 |
| Large      | Control   | Helpers         | 4          | -          | Small     | Treatment | Breeding Female | -0.1       | -2.1921  | 5.20 | -0.42149 | 539         | 1.000 |
| Large      | Control   | Helpers         | 4          | -          | Small     | Treatment | Breeding Female | 0.1        | 9.5596   | 5.20 | 1.83846  | 539         | 1.000 |
| Large      | Control   | Helpers         | 4          | -          | Small     | Treatment | Breeding Male   | -0.1       | -8.6088  | 5.20 | -1.65526 | 539         | 1.000 |
| Large      | Control   | Helpers         | 4          | -          | Small     | Treatment | Breeding Male   | 0.1        | -42.5237 | 5.20 | -8.17794 | 539         | <.001 |
| Large      | Control   | Helpers         | 4          | -          | Small     | Treatment | Helpers         | -0.1       | 0.4120   | 5.20 | 0.07922  | 539         | 1.000 |
| Large      | Control   | Helpers         | 4          | -          | Small     | Treatment | Helpers         | 0.1        | 7.2680   | 5.20 | 1.39774  | 539         | 1.000 |
| Large      | Treatment | Breeding Female | -0.1       | -          | Large     | Control   | Breeding Female | -0.1       | 3.8256   | 4.86 | 0.78656  | 538         | 1.000 |
| Large      | Treatment | Breeding Female | -0.1       | -          | Large     | Control   | Breeding Male   | -0.1       | 0.7423   | 4.86 | 0.15262  | 538         | 1.000 |
| Large      | Treatment | Breeding Female | -0.1       | -          | Large     | Control   | Helpers         | -0.1       | 11.3467  | 4.86 | 2.33295  | 538         | 1.000 |
| Large      | Treatment | Breeding Female | -0.1       | -          | Large     | Treatment | Breeding Male   | -0.1       | -5.5625  | 4.50 | -1.23735 | 549         | 1.000 |
| Large      | Treatment | Breeding Female | -0.1       | -          | Large     | Treatment | Helpers         | -0.1       | 12.3772  | 4.50 | 2.75325  | 549         | 1.000 |
| Large      | Treatment | Breeding Female | -0.1       | -          | Small     | Control   | Breeding Female | -0.1       | 8.3256   | 4.86 | 1.71179  | 538         | 1.000 |
| Large      | Treatment | Breeding Female | -0.1       | -          | Small     | Control   | Breeding Male   | -0.1       | -1.5077  | 4.86 | -0.31000 | 538         | 1.000 |
| Large      | Treatment | Breeding Female | -0.1       | -          | Small     | Control   | Helpers         | -0.1       | 12.3951  | 4.86 | 2.54849  | 538         | 1.000 |
| Large      | Treatment | Breeding Female | -0.1       | -          | Small     | Treatment | Breeding Male   | -0.1       | 2.4820   | 4.87 | 0.50922  | 543         | 1.000 |
| Large      | Treatment | Breeding Female | -0.1       | -          | Small     | Treatment | Helpers         | -0.1       | 11.5028  | 4.87 | 2.35999  | 543         | 1.000 |
| Large      | Treatment | Breeding Female | 0.1        | -          | Large     | Control   | Breeding Female | -0.1       | 3.5769   | 4.86 | 0.73554  | 538         | 1.000 |
| Large      | Treatment | Breeding Female | 0.1        | -          | Large     | Control   | Breeding Female | 0.1        | -1.4231  | 4.86 | -0.29263 | 538         | 1.000 |
| Large      | Treatment | Breeding Female | 0.1        | -          | Large     | Control   | Breeding Male   | -0.1       | 0.4936   | 4.86 | 0.10150  | 538         | 1.000 |
| Large      | Treatment | Breeding Female | 0.1        | -          | Large     | Control   | Breeding Male   | 0.1        | -0.6731  | 4.86 | -0.13840 | 538         | 1.000 |
| Large      | Treatment | Breeding Female | 0.1        | -          | Large     | Control   | Helpers         | -0.1       | 11.0981  | 4.86 | 2.28213  | 538         | 1.000 |
| Large      | Treatment | Breeding Female | 0.1        | -          | Large     | Control   | Helpers         | 0.1        | 12.0823  | 4.86 | 2.48452  | 538         | 1.000 |
| Large      | Treatment | Breeding Female | 0.1        | -          | Large     | Treatment | Breeding Female | -0.1       | -0.2487  | 4.50 | -0.05529 | 550         | 1.000 |
| Large      | Treatment | Breeding Female | 0.1        | -          | Large     | Treatment | Breeding Male   | -0.1       | -5.8112  | 4.50 | -1.29214 | 550         | 1.000 |
| Large      | Treatment | Breeding Female | 0.1        | -          | Large     | Treatment | Breeding Male   | 0.1        | -9.2500  | 4.50 | -2.05762 | 549         | 1.000 |



Post Hoc Comparisons - Group Size \* Treatment \* Subject \* Time Point

|            |           | Comparison      |            |            |           |           |                 |      | Difference | SE   | t        | df  | Pbonferroni |
|------------|-----------|-----------------|------------|------------|-----------|-----------|-----------------|------|------------|------|----------|-----|-------------|
| Group Size | Treatment | Subject         | Time Point | Group Size | Treatment | Subject   | Time Point      |      |            |      |          |     |             |
| Large      | Treatment | Breeding Female | 0.1        | -          | Large     | Treatment | Helpers         | -0.1 | 12.1286    | 4.50 | 2.69685  | 550 | 1.000       |
| Large      | Treatment | Breeding Female | 0.1        | -          | Large     | Treatment | Helpers         | 0.1  | 12.6257    | 4.50 | 2.80853  | 549 | 1.000       |
| Large      | Treatment | Breeding Female | 0.1        | -          | Small     | Control   | Breeding Female | -0.1 | 8.0769     | 4.86 | 1.66089  | 538 | 1.000       |
| Large      | Treatment | Breeding Female | 0.1        | -          | Small     | Control   | Breeding Female | 0.1  | 5.4103     | 4.86 | 1.11253  | 538 | 1.000       |
| Large      | Treatment | Breeding Female | 0.1        | -          | Small     | Control   | Breeding Male   | -0.1 | -1.7564    | 4.86 | -0.36117 | 538 | 1.000       |
| Large      | Treatment | Breeding Female | 0.1        | -          | Small     | Control   | Breeding Male   | 0.1  | -8.3397    | 4.86 | -1.71492 | 538 | 1.000       |
| Large      | Treatment | Breeding Female | 0.1        | -          | Small     | Control   | Helpers         | -0.1 | 12.1464    | 4.86 | 2.49770  | 538 | 1.000       |
| Large      | Treatment | Breeding Female | 0.1        | -          | Small     | Control   | Helpers         | 0.1  | 14.6394    | 4.86 | 3.01035  | 538 | 1.000       |
| Large      | Treatment | Breeding Female | 0.1        | -          | Small     | Treatment | Breeding Female | -0.1 | 8.6500     | 4.87 | 1.77605  | 544 | 1.000       |
| Large      | Treatment | Breeding Female | 0.1        | -          | Small     | Treatment | Breeding Male   | -0.1 | 2.2333     | 4.87 | 0.45855  | 544 | 1.000       |
| Large      | Treatment | Breeding Female | 0.1        | -          | Small     | Treatment | Breeding Male   | 0.1  | -31.6816   | 4.87 | -6.50474 | 543 | <.001       |
| Large      | Treatment | Breeding Female | 0.1        | -          | Small     | Treatment | Helpers         | -0.1 | 11.2541    | 4.87 | 2.31075  | 544 | 1.000       |
| Large      | Treatment | Breeding Female | 0.1        | -          | Small     | Treatment | Helpers         | 0.1  | 18.1101    | 4.87 | 3.71829  | 543 | 0.250       |
| Large      | Treatment | Breeding Female | 24         | -          | Large     | Control   | Breeding Female | -0.1 | 0.8269     | 4.86 | 0.17005  | 538 | 1.000       |
| Large      | Treatment | Breeding Female | 24         | -          | Large     | Control   | Breeding Female | 0.1  | -4.1731    | 4.86 | -0.85812 | 538 | 1.000       |
| Large      | Treatment | Breeding Female | 24         | -          | Large     | Control   | Breeding Female | 24   | -1.2564    | 4.86 | -0.25835 | 538 | 1.000       |
| Large      | Treatment | Breeding Female | 24         | -          | Large     | Control   | Breeding Female | 4    | -0.4231    | 4.86 | -0.08699 | 538 | 1.000       |
| Large      | Treatment | Breeding Female | 24         | -          | Large     | Control   | Breeding Male   | -0.1 | -2.2564    | 4.86 | -0.46399 | 538 | 1.000       |
| Large      | Treatment | Breeding Female | 24         | -          | Large     | Control   | Breeding Male   | 0.1  | -3.4231    | 4.86 | -0.70389 | 538 | 1.000       |
| Large      | Treatment | Breeding Female | 24         | -          | Large     | Control   | Breeding Male   | 24   | 0.3269     | 4.86 | 0.06723  | 538 | 1.000       |
| Large      | Treatment | Breeding Female | 24         | -          | Large     | Control   | Breeding Male   | 4    | 0.2436     | 4.86 | 0.05009  | 538 | 1.000       |
| Large      | Treatment | Breeding Female | 24         | -          | Large     | Control   | Helpers         | -0.1 | 8.3481     | 4.86 | 1.71664  | 538 | 1.000       |
| Large      | Treatment | Breeding Female | 24         | -          | Large     | Control   | Helpers         | 0.1  | 9.3323     | 4.86 | 1.91903  | 538 | 1.000       |
| Large      | Treatment | Breeding Female | 24         | -          | Large     | Control   | Helpers         | 24   | 8.1716     | 4.86 | 1.68035  | 538 | 1.000       |
| Large      | Treatment | Breeding Female | 24         | -          | Large     | Control   | Helpers         | 4    | 8.0921     | 4.86 | 1.66401  | 538 | 1.000       |
| Large      | Treatment | Breeding Female | 24         | -          | Large     | Treatment | Breeding Female | -0.1 | -2.9987    | 4.50 | -0.66677 | 550 | 1.000       |
| Large      | Treatment | Breeding Female | 24         | -          | Large     | Treatment | Breeding Female | 0.1  | -2.7500    | 4.50 | -0.61172 | 549 | 1.000       |
| Large      | Treatment | Breeding Female | 24         | -          | Large     | Treatment | Breeding Female | 4    | 13.0625    | 4.50 | 2.90569  | 549 | 1.000       |
| Large      | Treatment | Breeding Female | 24         | -          | Large     | Treatment | Breeding Male   | -0.1 | -8.5612    | 4.50 | -1.90362 | 550 | 1.000       |
| Large      | Treatment | Breeding Female | 24         | -          | Large     | Treatment | Breeding Male   | 0.1  | -12.0000   | 4.50 | -2.66934 | 549 | 1.000       |
| Large      | Treatment | Breeding Female | 24         | -          | Large     | Treatment | Breeding Male   | 24   | -28.0625   | 4.50 | -6.24236 | 549 | <.001       |
| Large      | Treatment | Breeding Female | 24         | -          | Large     | Treatment | Breeding Male   | 4    | -32.2500   | 4.50 | -7.17385 | 549 | <.001       |
| Large      | Treatment | Breeding Female | 24         | -          | Large     | Treatment | Helpers         | -0.1 | 9.3786     | 4.50 | 2.08537  | 550 | 1.000       |
| Large      | Treatment | Breeding Female | 24         | -          | Large     | Treatment | Helpers         | 0.1  | 9.8757     | 4.50 | 2.19681  | 549 | 1.000       |

Post Hoc Comparisons - Group Size \* Treatment \* Subject \* Time Point

| Comparison |           |                 |            |            |           |           |                 |            |          |      |          |             |       |
|------------|-----------|-----------------|------------|------------|-----------|-----------|-----------------|------------|----------|------|----------|-------------|-------|
| Group Size | Treatment | Subject         | Time Point | Group Size | Treatment | Subject   | Time Point      | Difference | SE       | t    | df       | Pbonferroni |       |
| Large      | Treatment | Breeding Female | 24         | -          | Large     | Treatment | Helpers         | 24         | 11.4714  | 4.50 | 2.55175  | 549         | 1.000 |
| Large      | Treatment | Breeding Female | 24         | -          | Large     | Treatment | Helpers         | 4          | 10.3869  | 4.50 | 2.31051  | 549         | 1.000 |
| Large      | Treatment | Breeding Female | 24         | -          | Small     | Control   | Breeding Female | -0.1       | 5.3269   | 4.86 | 1.09540  | 538         | 1.000 |
| Large      | Treatment | Breeding Female | 24         | -          | Small     | Control   | Breeding Female | 0.1        | 2.6603   | 4.86 | 0.54704  | 538         | 1.000 |
| Large      | Treatment | Breeding Female | 24         | -          | Small     | Control   | Breeding Female | 24         | 4.5769   | 4.86 | 0.94117  | 538         | 1.000 |
| Large      | Treatment | Breeding Female | 24         | -          | Small     | Control   | Breeding Female | 4          | 4.4936   | 4.86 | 0.92403  | 538         | 1.000 |
| Large      | Treatment | Breeding Female | 24         | -          | Small     | Control   | Breeding Male   | -0.1       | -4.5064  | 4.86 | -0.92666 | 538         | 1.000 |
| Large      | Treatment | Breeding Female | 24         | -          | Small     | Control   | Breeding Male   | 0.1        | -11.0897 | 4.86 | -2.28041 | 538         | 1.000 |
| Large      | Treatment | Breeding Female | 24         | -          | Small     | Control   | Breeding Male   | 24         | -5.8397  | 4.86 | -1.20084 | 538         | 1.000 |
| Large      | Treatment | Breeding Female | 24         | -          | Small     | Control   | Breeding Male   | 4          | -4.3397  | 4.86 | -0.89239 | 538         | 1.000 |
| Large      | Treatment | Breeding Female | 24         | -          | Small     | Control   | Helpers         | -0.1       | 9.3964   | 4.86 | 1.93221  | 538         | 1.000 |
| Large      | Treatment | Breeding Female | 24         | -          | Small     | Control   | Helpers         | 0.1        | 11.8894  | 4.86 | 2.44486  | 538         | 1.000 |
| Large      | Treatment | Breeding Female | 24         | -          | Small     | Control   | Helpers         | 24         | 9.9589   | 4.86 | 2.04788  | 538         | 1.000 |
| Large      | Treatment | Breeding Female | 24         | -          | Small     | Control   | Helpers         | 4          | 9.5839   | 4.86 | 1.97076  | 538         | 1.000 |
| Large      | Treatment | Breeding Female | 24         | -          | Small     | Treatment | Breeding Female | -0.1       | 5.9000   | 4.87 | 1.21141  | 544         | 1.000 |
| Large      | Treatment | Breeding Female | 24         | -          | Small     | Treatment | Breeding Female | 0.1        | 17.6518  | 4.87 | 3.62419  | 543         | 0.358 |
| Large      | Treatment | Breeding Female | 24         | -          | Small     | Treatment | Breeding Female | 4          | 10.4018  | 4.87 | 2.13565  | 543         | 1.000 |
| Large      | Treatment | Breeding Female | 24         | -          | Small     | Treatment | Breeding Male   | -0.1       | -0.5167  | 4.87 | -0.10609 | 544         | 1.000 |
| Large      | Treatment | Breeding Female | 24         | -          | Small     | Treatment | Breeding Male   | 0.1        | -34.4316 | 4.87 | -7.06936 | 543         | <.001 |
| Large      | Treatment | Breeding Female | 24         | -          | Small     | Treatment | Breeding Male   | 24         | -13.6816 | 4.87 | -2.80905 | 543         | 1.000 |
| Large      | Treatment | Breeding Female | 24         | -          | Small     | Treatment | Breeding Male   | 4          | -11.5149 | 4.87 | -2.36419 | 543         | 1.000 |
| Large      | Treatment | Breeding Female | 24         | -          | Small     | Treatment | Helpers         | -0.1       | 8.5041   | 4.87 | 1.74611  | 544         | 1.000 |
| Large      | Treatment | Breeding Female | 24         | -          | Small     | Treatment | Helpers         | 0.1        | 15.3601  | 4.87 | 3.15368  | 543         | 1.000 |
| Large      | Treatment | Breeding Female | 24         | -          | Small     | Treatment | Helpers         | 24         | 12.7351  | 4.87 | 2.61472  | 543         | 1.000 |
| Large      | Treatment | Breeding Female | 24         | -          | Small     | Treatment | Helpers         | 4          | 11.0476  | 4.87 | 2.26825  | 543         | 1.000 |
| Large      | Treatment | Breeding Female | 4          | -          | Large     | Control   | Breeding Female | -0.1       | -12.2356 | 4.86 | -2.51603 | 538         | 1.000 |
| Large      | Treatment | Breeding Female | 4          | -          | Large     | Control   | Breeding Female | 0.1        | -17.2356 | 4.86 | -3.54420 | 538         | 0.483 |
| Large      | Treatment | Breeding Female | 4          | -          | Large     | Control   | Breeding Female | 4          | -13.4856 | 4.86 | -2.77307 | 538         | 1.000 |
| Large      | Treatment | Breeding Female | 4          | -          | Large     | Control   | Breeding Male   | -0.1       | -15.3189 | 4.86 | -3.15007 | 538         | 1.000 |
| Large      | Treatment | Breeding Female | 4          | -          | Large     | Control   | Breeding Male   | 0.1        | -16.4856 | 4.86 | -3.38997 | 538         | 0.846 |
| Large      | Treatment | Breeding Female | 4          | -          | Large     | Control   | Breeding Male   | 4          | -12.8189 | 4.86 | -2.63598 | 538         | 1.000 |
| Large      | Treatment | Breeding Female | 4          | -          | Large     | Control   | Helpers         | -0.1       | -4.7144  | 4.86 | -0.96944 | 538         | 1.000 |
| Large      | Treatment | Breeding Female | 4          | -          | Large     | Control   | Helpers         | 0.1        | -3.7302  | 4.86 | -0.76705 | 538         | 1.000 |
| Large      | Treatment | Breeding Female | 4          | -          | Large     | Control   | Helpers         | 4          | -4.9704  | 4.86 | -1.02207 | 538         | 1.000 |

Post Hoc Comparisons - Group Size \* Treatment \* Subject \* Time Point

| Comparison |           |                 |            |            |           |                 |            |            |      |           |     |             |
|------------|-----------|-----------------|------------|------------|-----------|-----------------|------------|------------|------|-----------|-----|-------------|
| Group Size | Treatment | Subject         | Time Point | Group Size | Treatment | Subject         | Time Point | Difference | SE   | t         | df  | Pbonferroni |
| Large      | Treatment | Breeding Female | 4          | - Large    | Treatment | Breeding Female | -0.1       | -16.0612   | 4.50 | -3.57128  | 550 | 0.436       |
| Large      | Treatment | Breeding Female | 4          | - Large    | Treatment | Breeding Female | 0.1        | -15.8125   | 4.50 | -3.51741  | 549 | 0.532       |
| Large      | Treatment | Breeding Female | 4          | - Large    | Treatment | Breeding Male   | -0.1       | -21.6237   | 4.50 | -4.80813  | 550 | 0.002       |
| Large      | Treatment | Breeding Female | 4          | - Large    | Treatment | Breeding Male   | 0.1        | -25.0625   | 4.50 | -5.57503  | 549 | <.001       |
| Large      | Treatment | Breeding Female | 4          | - Large    | Treatment | Breeding Male   | 4          | -45.3125   | 4.50 | -10.07954 | 549 | <.001       |
| Large      | Treatment | Breeding Female | 4          | - Large    | Treatment | Helpers         | -0.1       | -3.6839    | 4.50 | -0.81914  | 550 | 1.000       |
| Large      | Treatment | Breeding Female | 4          | - Large    | Treatment | Helpers         | 0.1        | -3.1868    | 4.50 | -0.70888  | 549 | 1.000       |
| Large      | Treatment | Breeding Female | 4          | - Large    | Treatment | Helpers         | 4          | -2.6756    | 4.50 | -0.59517  | 549 | 1.000       |
| Large      | Treatment | Breeding Female | 4          | - Small    | Control   | Breeding Female | -0.1       | -7.7356    | 4.86 | -1.59068  | 538 | 1.000       |
| Large      | Treatment | Breeding Female | 4          | - Small    | Control   | Breeding Female | 0.1        | -10.4022   | 4.86 | -2.13904  | 538 | 1.000       |
| Large      | Treatment | Breeding Female | 4          | - Small    | Control   | Breeding Female | 4          | -8.5689    | 4.86 | -1.76204  | 538 | 1.000       |
| Large      | Treatment | Breeding Female | 4          | - Small    | Control   | Breeding Male   | -0.1       | -17.5689   | 4.86 | -3.61274  | 538 | 0.374       |
| Large      | Treatment | Breeding Female | 4          | - Small    | Control   | Breeding Male   | 0.1        | -24.1522   | 4.86 | -4.96649  | 538 | 0.001       |
| Large      | Treatment | Breeding Female | 4          | - Small    | Control   | Breeding Male   | 4          | -17.4022   | 4.86 | -3.57847  | 538 | 0.425       |
| Large      | Treatment | Breeding Female | 4          | - Small    | Control   | Helpers         | -0.1       | -3.6661    | 4.86 | -0.75387  | 538 | 1.000       |
| Large      | Treatment | Breeding Female | 4          | - Small    | Control   | Helpers         | 0.1        | -1.1731    | 4.86 | -0.24122  | 538 | 1.000       |
| Large      | Treatment | Breeding Female | 4          | - Small    | Control   | Helpers         | 4          | -3.4786    | 4.86 | -0.71532  | 538 | 1.000       |
| Large      | Treatment | Breeding Female | 4          | - Small    | Treatment | Breeding Female | -0.1       | -7.1625    | 4.87 | -1.47064  | 544 | 1.000       |
| Large      | Treatment | Breeding Female | 4          | - Small    | Treatment | Breeding Female | 0.1        | 4.5893     | 4.87 | 0.94225   | 543 | 1.000       |
| Large      | Treatment | Breeding Female | 4          | - Small    | Treatment | Breeding Male   | -0.1       | -13.5792   | 4.87 | -2.78814  | 544 | 1.000       |
| Large      | Treatment | Breeding Female | 4          | - Small    | Treatment | Breeding Male   | 0.1        | -47.4941   | 4.87 | -9.75130  | 543 | <.001       |
| Large      | Treatment | Breeding Female | 4          | - Small    | Treatment | Breeding Male   | 4          | -24.5774   | 4.87 | -5.04614  | 543 | <.001       |
| Large      | Treatment | Breeding Female | 4          | - Small    | Treatment | Helpers         | -0.1       | -4.5584    | 4.87 | -0.93594  | 544 | 1.000       |
| Large      | Treatment | Breeding Female | 4          | - Small    | Treatment | Helpers         | 0.1        | 2.2976     | 4.87 | 0.47173   | 543 | 1.000       |
| Large      | Treatment | Breeding Female | 4          | - Small    | Treatment | Helpers         | 4          | -2.0149    | 4.87 | -0.41369  | 543 | 1.000       |
| Large      | Treatment | Breeding Male   | -0.1       | - Large    | Control   | Breeding Male   | -0.1       | 6.3048     | 4.86 | 1.29629   | 538 | 1.000       |
| Large      | Treatment | Breeding Male   | -0.1       | - Large    | Control   | Helpers         | -0.1       | 16.9092    | 4.86 | 3.47663   | 538 | 0.619       |
| Large      | Treatment | Breeding Male   | -0.1       | - Large    | Treatment | Helpers         | -0.1       | 17.9397    | 4.50 | 3.99060   | 549 | 0.084       |
| Large      | Treatment | Breeding Male   | -0.1       | - Small    | Control   | Breeding Male   | -0.1       | 4.0548     | 4.86 | 0.83368   | 538 | 1.000       |
| Large      | Treatment | Breeding Male   | -0.1       | - Small    | Control   | Helpers         | -0.1       | 17.9576    | 4.86 | 3.69217   | 538 | 0.276       |
| Large      | Treatment | Breeding Male   | -0.1       | - Small    | Treatment | Helpers         | -0.1       | 17.0653    | 4.87 | 3.50122   | 543 | 0.565       |
| Large      | Treatment | Breeding Male   | 0.1        | - Large    | Control   | Breeding Female | -0.1       | 12.8269    | 4.86 | 2.63764   | 538 | 1.000       |
| Large      | Treatment | Breeding Male   | 0.1        | - Large    | Control   | Breeding Male   | -0.1       | 9.7436     | 4.86 | 2.00361   | 538 | 1.000       |
| Large      | Treatment | Breeding Male   | 0.1        | - Large    | Control   | Breeding Male   | 0.1        | 8.5769     | 4.86 | 1.76370   | 538 | 1.000       |

Post Hoc Comparisons - Group Size \* Treatment \* Subject \* Time Point

|            |           | Comparison    |            |            |           |           |                 | Difference | SE      | t    | df       | Pbonferroni |       |
|------------|-----------|---------------|------------|------------|-----------|-----------|-----------------|------------|---------|------|----------|-------------|-------|
| Group Size | Treatment | Subject       | Time Point | Group Size | Treatment | Subject   | Time Point      |            |         |      |          |             |       |
| Large      | Treatment | Breeding Male | 0.1        | -          | Large     | Control   | Helpers         | -0.1       | 20.3481 | 4.86 | 4.18423  | 538         | 0.038 |
| Large      | Treatment | Breeding Male | 0.1        | -          | Large     | Control   | Helpers         | 0.1        | 21.3323 | 4.86 | 4.38662  | 538         | 0.016 |
| Large      | Treatment | Breeding Male | 0.1        | -          | Large     | Treatment | Breeding Female | -0.1       | 9.0013  | 4.50 | 2.00149  | 550         | 1.000 |
| Large      | Treatment | Breeding Male | 0.1        | -          | Large     | Treatment | Breeding Male   | -0.1       | 3.4388  | 4.50 | 0.76464  | 550         | 1.000 |
| Large      | Treatment | Breeding Male | 0.1        | -          | Large     | Treatment | Helpers         | -0.1       | 21.3786 | 4.50 | 4.75364  | 550         | 0.003 |
| Large      | Treatment | Breeding Male | 0.1        | -          | Large     | Treatment | Helpers         | 0.1        | 21.8757 | 4.50 | 4.86615  | 549         | 0.002 |
| Large      | Treatment | Breeding Male | 0.1        | -          | Small     | Control   | Breeding Female | -0.1       | 17.3269 | 4.86 | 3.56299  | 538         | 0.450 |
| Large      | Treatment | Breeding Male | 0.1        | -          | Small     | Control   | Breeding Male   | -0.1       | 7.4936  | 4.86 | 1.54093  | 538         | 1.000 |
| Large      | Treatment | Breeding Male | 0.1        | -          | Small     | Control   | Breeding Male   | 0.1        | 0.9103  | 4.86 | 0.18718  | 538         | 1.000 |
| Large      | Treatment | Breeding Male | 0.1        | -          | Small     | Control   | Helpers         | -0.1       | 21.3964 | 4.86 | 4.39980  | 538         | 0.015 |
| Large      | Treatment | Breeding Male | 0.1        | -          | Small     | Control   | Helpers         | 0.1        | 23.8894 | 4.86 | 4.91245  | 538         | 0.001 |
| Large      | Treatment | Breeding Male | 0.1        | -          | Small     | Treatment | Breeding Female | -0.1       | 17.9000 | 4.87 | 3.67531  | 544         | 0.295 |
| Large      | Treatment | Breeding Male | 0.1        | -          | Small     | Treatment | Breeding Male   | -0.1       | 11.4833 | 4.87 | 2.35781  | 544         | 1.000 |
| Large      | Treatment | Breeding Male | 0.1        | -          | Small     | Treatment | Helpers         | -0.1       | 20.5041 | 4.87 | 4.21000  | 544         | 0.034 |
| Large      | Treatment | Breeding Male | 0.1        | -          | Small     | Treatment | Helpers         | 0.1        | 27.3601 | 4.87 | 5.61747  | 543         | <.001 |
| Large      | Treatment | Breeding Male | 24         | -          | Large     | Control   | Breeding Female | -0.1       | 28.8894 | 4.86 | 5.94062  | 538         | <.001 |
| Large      | Treatment | Breeding Male | 24         | -          | Large     | Control   | Breeding Female | 0.1        | 23.8894 | 4.86 | 4.91245  | 538         | 0.001 |
| Large      | Treatment | Breeding Male | 24         | -          | Large     | Control   | Breeding Female | 4          | 27.6394 | 4.86 | 5.68358  | 538         | <.001 |
| Large      | Treatment | Breeding Male | 24         | -          | Large     | Control   | Breeding Male   | -0.1       | 25.8061 | 4.86 | 5.30658  | 538         | <.001 |
| Large      | Treatment | Breeding Male | 24         | -          | Large     | Control   | Breeding Male   | 0.1        | 24.6394 | 4.86 | 5.06668  | 538         | <.001 |
| Large      | Treatment | Breeding Male | 24         | -          | Large     | Control   | Breeding Male   | 24         | 28.3894 | 4.86 | 5.83780  | 538         | <.001 |
| Large      | Treatment | Breeding Male | 24         | -          | Large     | Control   | Breeding Male   | 4          | 28.3061 | 4.86 | 5.82067  | 538         | <.001 |
| Large      | Treatment | Breeding Male | 24         | -          | Large     | Control   | Helpers         | -0.1       | 36.4106 | 4.86 | 7.48721  | 538         | <.001 |
| Large      | Treatment | Breeding Male | 24         | -          | Large     | Control   | Helpers         | 0.1        | 37.3948 | 4.86 | 7.68960  | 538         | <.001 |
| Large      | Treatment | Breeding Male | 24         | -          | Large     | Control   | Helpers         | 24         | 36.2341 | 4.86 | 7.45092  | 538         | <.001 |
| Large      | Treatment | Breeding Male | 24         | -          | Large     | Control   | Helpers         | 4          | 36.1546 | 4.86 | 7.43458  | 538         | <.001 |
| Large      | Treatment | Breeding Male | 24         | -          | Large     | Treatment | Breeding Female | -0.1       | 25.0638 | 4.50 | 5.57307  | 550         | <.001 |
| Large      | Treatment | Breeding Male | 24         | -          | Large     | Treatment | Breeding Female | 0.1        | 25.3125 | 4.50 | 5.63064  | 549         | <.001 |
| Large      | Treatment | Breeding Male | 24         | -          | Large     | Treatment | Breeding Female | 4          | 41.1250 | 4.50 | 9.14805  | 549         | <.001 |
| Large      | Treatment | Breeding Male | 24         | -          | Large     | Treatment | Breeding Male   | -0.1       | 19.5013 | 4.50 | 4.33622  | 550         | 0.019 |
| Large      | Treatment | Breeding Male | 24         | -          | Large     | Treatment | Breeding Male   | 0.1        | 16.0625 | 4.50 | 3.57302  | 549         | 0.433 |
| Large      | Treatment | Breeding Male | 24         | -          | Large     | Treatment | Breeding Male   | 4          | -4.1875 | 4.50 | -0.93149 | 549         | 1.000 |
| Large      | Treatment | Breeding Male | 24         | -          | Large     | Treatment | Helpers         | -0.1       | 37.4411 | 4.50 | 8.32522  | 550         | <.001 |
| Large      | Treatment | Breeding Male | 24         | -          | Large     | Treatment | Helpers         | 0.1        | 37.9382 | 4.50 | 8.43917  | 549         | <.001 |

Post Hoc Comparisons - Group Size \* Treatment \* Subject \* Time Point

| Comparison |           |               |            |            |           |           |                 |            |         |      |          |             |       |
|------------|-----------|---------------|------------|------------|-----------|-----------|-----------------|------------|---------|------|----------|-------------|-------|
| Group Size | Treatment | Subject       | Time Point | Group Size | Treatment | Subject   | Time Point      | Difference | SE      | t    | df       | Pbonferroni |       |
| Large      | Treatment | Breeding Male | 24         | -          | Large     | Treatment | Helpers         | 24         | 39.5339 | 4.50 | 8.79411  | 549         | <.001 |
| Large      | Treatment | Breeding Male | 24         | -          | Large     | Treatment | Helpers         | 4          | 38.4494 | 4.50 | 8.55288  | 549         | <.001 |
| Large      | Treatment | Breeding Male | 24         | -          | Small     | Control   | Breeding Female | -0.1       | 33.3894 | 4.86 | 6.86597  | 538         | <.001 |
| Large      | Treatment | Breeding Male | 24         | -          | Small     | Control   | Breeding Female | 0.1        | 30.7228 | 4.86 | 6.31761  | 538         | <.001 |
| Large      | Treatment | Breeding Male | 24         | -          | Small     | Control   | Breeding Female | 4          | 32.5561 | 4.86 | 6.69461  | 538         | <.001 |
| Large      | Treatment | Breeding Male | 24         | -          | Small     | Control   | Breeding Male   | -0.1       | 23.5561 | 4.86 | 4.84391  | 538         | 0.002 |
| Large      | Treatment | Breeding Male | 24         | -          | Small     | Control   | Breeding Male   | 0.1        | 16.9728 | 4.86 | 3.49016  | 538         | 0.589 |
| Large      | Treatment | Breeding Male | 24         | -          | Small     | Control   | Breeding Male   | 24         | 22.2228 | 4.86 | 4.56973  | 538         | 0.007 |
| Large      | Treatment | Breeding Male | 24         | -          | Small     | Control   | Breeding Male   | 4          | 23.7228 | 4.86 | 4.87818  | 538         | 0.002 |
| Large      | Treatment | Breeding Male | 24         | -          | Small     | Control   | Helpers         | -0.1       | 37.4589 | 4.86 | 7.70278  | 538         | <.001 |
| Large      | Treatment | Breeding Male | 24         | -          | Small     | Control   | Helpers         | 0.1        | 39.9519 | 4.86 | 8.21543  | 538         | <.001 |
| Large      | Treatment | Breeding Male | 24         | -          | Small     | Control   | Helpers         | 24         | 38.0214 | 4.86 | 7.81845  | 538         | <.001 |
| Large      | Treatment | Breeding Male | 24         | -          | Small     | Control   | Helpers         | 4          | 37.6464 | 4.86 | 7.74133  | 538         | <.001 |
| Large      | Treatment | Breeding Male | 24         | -          | Small     | Treatment | Breeding Female | -0.1       | 33.9625 | 4.87 | 6.97333  | 544         | <.001 |
| Large      | Treatment | Breeding Male | 24         | -          | Small     | Treatment | Breeding Female | 0.1        | 45.7143 | 4.87 | 9.38587  | 543         | <.001 |
| Large      | Treatment | Breeding Male | 24         | -          | Small     | Treatment | Breeding Female | 4          | 38.4643 | 4.87 | 7.89733  | 543         | <.001 |
| Large      | Treatment | Breeding Male | 24         | -          | Small     | Treatment | Breeding Male   | -0.1       | 27.5458 | 4.87 | 5.65583  | 544         | <.001 |
| Large      | Treatment | Breeding Male | 24         | -          | Small     | Treatment | Breeding Male   | 0.1        | -6.3691 | 4.87 | -1.30767 | 543         | 1.000 |
| Large      | Treatment | Breeding Male | 24         | -          | Small     | Treatment | Breeding Male   | 4          | 16.5476 | 4.87 | 3.39749  | 543         | 0.823 |
| Large      | Treatment | Breeding Male | 24         | -          | Small     | Treatment | Helpers         | -0.1       | 36.5666 | 4.87 | 7.50803  | 544         | <.001 |
| Large      | Treatment | Breeding Male | 24         | -          | Small     | Treatment | Helpers         | 0.1        | 43.4226 | 4.87 | 8.91536  | 543         | <.001 |
| Large      | Treatment | Breeding Male | 24         | -          | Small     | Treatment | Helpers         | 24         | 40.7976 | 4.87 | 8.37640  | 543         | <.001 |
| Large      | Treatment | Breeding Male | 24         | -          | Small     | Treatment | Helpers         | 4          | 39.1101 | 4.87 | 8.02993  | 543         | <.001 |
| Large      | Treatment | Breeding Male | 4          | -          | Large     | Control   | Breeding Female | -0.1       | 33.0769 | 4.86 | 6.80171  | 538         | <.001 |
| Large      | Treatment | Breeding Male | 4          | -          | Large     | Control   | Breeding Female | 0.1        | 28.0769 | 4.86 | 5.77354  | 538         | <.001 |
| Large      | Treatment | Breeding Male | 4          | -          | Large     | Control   | Breeding Male   | -0.1       | 29.9936 | 4.86 | 6.16767  | 538         | <.001 |
| Large      | Treatment | Breeding Male | 4          | -          | Large     | Control   | Breeding Male   | 0.1        | 28.8269 | 4.86 | 5.92777  | 538         | <.001 |
| Large      | Treatment | Breeding Male | 4          | -          | Large     | Control   | Breeding Male   | 4          | 32.4936 | 4.86 | 6.68175  | 538         | <.001 |
| Large      | Treatment | Breeding Male | 4          | -          | Large     | Control   | Helpers         | -0.1       | 40.5981 | 4.86 | 8.34830  | 538         | <.001 |
| Large      | Treatment | Breeding Male | 4          | -          | Large     | Control   | Helpers         | 0.1        | 41.5823 | 4.86 | 8.55069  | 538         | <.001 |
| Large      | Treatment | Breeding Male | 4          | -          | Large     | Control   | Helpers         | 4          | 40.3421 | 4.86 | 8.29567  | 538         | <.001 |
| Large      | Treatment | Breeding Male | 4          | -          | Large     | Treatment | Breeding Female | -0.1       | 29.2513 | 4.50 | 6.50419  | 550         | <.001 |
| Large      | Treatment | Breeding Male | 4          | -          | Large     | Treatment | Breeding Female | 0.1        | 29.5000 | 4.50 | 6.56213  | 549         | <.001 |
| Large      | Treatment | Breeding Male | 4          | -          | Large     | Treatment | Breeding Male   | -0.1       | 23.6888 | 4.50 | 5.26734  | 550         | <.001 |

Post Hoc Comparisons - Group Size \* Treatment \* Subject \* Time Point

| Comparison |           |               |            |            |           |                 |            |            |      |          |     |             |
|------------|-----------|---------------|------------|------------|-----------|-----------------|------------|------------|------|----------|-----|-------------|
| Group Size | Treatment | Subject       | Time Point | Group Size | Treatment | Subject         | Time Point | Difference | SE   | t        | df  | Pbonferroni |
| Large      | Treatment | Breeding Male | 4          | - Large    | Treatment | Breeding Male   | 0.1        | 20.2500    | 4.50 | 4.50451  | 549 | 0.009       |
| Large      | Treatment | Breeding Male | 4          | - Large    | Treatment | Helpers         | -0.1       | 41.6286    | 4.50 | 9.25633  | 550 | <.001       |
| Large      | Treatment | Breeding Male | 4          | - Large    | Treatment | Helpers         | 0.1        | 42.1257    | 4.50 | 9.37066  | 549 | <.001       |
| Large      | Treatment | Breeding Male | 4          | - Large    | Treatment | Helpers         | 4          | 42.6369    | 4.50 | 9.48437  | 549 | <.001       |
| Large      | Treatment | Breeding Male | 4          | - Small    | Control   | Breeding Female | -0.1       | 37.5769    | 4.86 | 7.72705  | 538 | <.001       |
| Large      | Treatment | Breeding Male | 4          | - Small    | Control   | Breeding Female | 0.1        | 34.9103    | 4.86 | 7.17870  | 538 | <.001       |
| Large      | Treatment | Breeding Male | 4          | - Small    | Control   | Breeding Male   | -0.1       | 27.7436    | 4.86 | 5.70500  | 538 | <.001       |
| Large      | Treatment | Breeding Male | 4          | - Small    | Control   | Breeding Male   | 0.1        | 21.1603    | 4.86 | 4.35125  | 538 | 0.018       |
| Large      | Treatment | Breeding Male | 4          | - Small    | Control   | Breeding Male   | 4          | 27.9103    | 4.86 | 5.73927  | 538 | <.001       |
| Large      | Treatment | Breeding Male | 4          | - Small    | Control   | Helpers         | -0.1       | 41.6464    | 4.86 | 8.56387  | 538 | <.001       |
| Large      | Treatment | Breeding Male | 4          | - Small    | Control   | Helpers         | 0.1        | 44.1394    | 4.86 | 9.07652  | 538 | <.001       |
| Large      | Treatment | Breeding Male | 4          | - Small    | Control   | Helpers         | 4          | 41.8339    | 4.86 | 8.60242  | 538 | <.001       |
| Large      | Treatment | Breeding Male | 4          | - Small    | Treatment | Breeding Female | -0.1       | 38.1500    | 4.87 | 7.83313  | 544 | <.001       |
| Large      | Treatment | Breeding Male | 4          | - Small    | Treatment | Breeding Female | 0.1        | 49.9018    | 4.87 | 10.24564 | 543 | <.001       |
| Large      | Treatment | Breeding Male | 4          | - Small    | Treatment | Breeding Male   | -0.1       | 31.7333    | 4.87 | 6.51563  | 544 | <.001       |
| Large      | Treatment | Breeding Male | 4          | - Small    | Treatment | Breeding Male   | 0.1        | -2.1816    | 4.87 | -0.44791 | 543 | 1.000       |
| Large      | Treatment | Breeding Male | 4          | - Small    | Treatment | Helpers         | -0.1       | 40.7541    | 4.87 | 8.36783  | 544 | <.001       |
| Large      | Treatment | Breeding Male | 4          | - Small    | Treatment | Helpers         | 0.1        | 47.6101    | 4.87 | 9.77512  | 543 | <.001       |
| Large      | Treatment | Breeding Male | 4          | - Small    | Treatment | Helpers         | 4          | 43.2976    | 4.87 | 8.88969  | 543 | <.001       |
| Large      | Treatment | Helpers       | -0.1       | - Large    | Control   | Helpers         | -0.1       | -1.0305    | 4.86 | -0.21187 | 538 | 1.000       |
| Large      | Treatment | Helpers       | -0.1       | - Small    | Control   | Helpers         | -0.1       | 0.0178     | 4.86 | 0.00366  | 538 | 1.000       |
| Large      | Treatment | Helpers       | 0.1        | - Large    | Control   | Breeding Female | -0.1       | -9.0488    | 4.86 | -1.86073 | 538 | 1.000       |
| Large      | Treatment | Helpers       | 0.1        | - Large    | Control   | Breeding Male   | -0.1       | -12.1321   | 4.86 | -2.49476 | 538 | 1.000       |
| Large      | Treatment | Helpers       | 0.1        | - Large    | Control   | Helpers         | -0.1       | -1.5277    | 4.86 | -0.31414 | 538 | 1.000       |
| Large      | Treatment | Helpers       | 0.1        | - Large    | Control   | Helpers         | 0.1        | -0.5434    | 4.86 | -0.11175 | 538 | 1.000       |
| Large      | Treatment | Helpers       | 0.1        | - Large    | Treatment | Breeding Female | -0.1       | -12.8744   | 4.50 | -2.86269 | 550 | 1.000       |
| Large      | Treatment | Helpers       | 0.1        | - Large    | Treatment | Breeding Male   | -0.1       | -18.4369   | 4.50 | -4.09954 | 550 | 0.054       |
| Large      | Treatment | Helpers       | 0.1        | - Large    | Treatment | Helpers         | -0.1       | -0.4972    | 4.50 | -0.11055 | 550 | 1.000       |
| Large      | Treatment | Helpers       | 0.1        | - Small    | Control   | Breeding Female | -0.1       | -4.5488    | 4.86 | -0.93538 | 538 | 1.000       |
| Large      | Treatment | Helpers       | 0.1        | - Small    | Control   | Breeding Male   | -0.1       | -14.3821   | 4.86 | -2.95744 | 538 | 1.000       |
| Large      | Treatment | Helpers       | 0.1        | - Small    | Control   | Helpers         | -0.1       | -0.4794    | 4.86 | -0.09857 | 538 | 1.000       |
| Large      | Treatment | Helpers       | 0.1        | - Small    | Control   | Helpers         | 0.1        | 2.0137     | 4.86 | 0.41408  | 538 | 1.000       |
| Large      | Treatment | Helpers       | 0.1        | - Small    | Treatment | Breeding Female | -0.1       | -3.9758    | 4.87 | -0.81632 | 544 | 1.000       |
| Large      | Treatment | Helpers       | 0.1        | - Small    | Treatment | Breeding Male   | -0.1       | -10.3924   | 4.87 | -2.13382 | 544 | 1.000       |
| Large      | Treatment | Helpers       | 0.1        | - Small    | Treatment | Helpers         | -0.1       | -1.3716    | 4.87 | -0.28162 | 544 | 1.000       |
| Large      | Treatment | Helpers       | 24         | - Large    | Control   | Breeding Female | -0.1       | -10.6444   | 4.86 | -2.18884 | 538 | 1.000       |
| Large      | Treatment | Helpers       | 24         | - Large    | Control   | Breeding Female | 0.1        | -15.6444   | 4.86 | -3.21700 | 538 | 1.000       |
| Large      | Treatment | Helpers       | 24         | - Large    | Control   | Breeding Female | 4          | -11.8944   | 4.86 | -2.44588 | 538 | 1.000       |

Post Hoc Comparisons - Group Size \* Treatment \* Subject \* Time Point

|            |           |         |            | Comparison |           |           |                 | Difference | SE       | t        | df       | Pbonferroni |       |
|------------|-----------|---------|------------|------------|-----------|-----------|-----------------|------------|----------|----------|----------|-------------|-------|
| Group Size | Treatment | Subject | Time Point | Group Size | Treatment | Subject   | Time Point      |            |          |          |          |             |       |
| Large      | Treatment | Helpers | 24         | -          | Large     | Control   | -0.1            | -13.7277   | 4.86     | -2.82287 | 538      | 1.000       |       |
| Large      | Treatment | Helpers | 24         | -          | Large     | Control   | Breeding Male   | 0.1        | -14.8944 | 4.86     | -3.06278 | 538         | 1.000 |
| Large      | Treatment | Helpers | 24         | -          | Large     | Control   | Breeding Male   | 4          | -11.2277 | 4.86     | -2.30879 | 538         | 1.000 |
| Large      | Treatment | Helpers | 24         | -          | Large     | Control   | Helpers         | -0.1       | -3.1233  | 4.86     | -0.64225 | 538         | 1.000 |
| Large      | Treatment | Helpers | 24         | -          | Large     | Control   | Helpers         | 0.1        | -2.1390  | 4.86     | -0.43986 | 538         | 1.000 |
| Large      | Treatment | Helpers | 24         | -          | Large     | Control   | Helpers         | 24         | -3.2998  | 4.86     | -0.67854 | 538         | 1.000 |
| Large      | Treatment | Helpers | 24         | -          | Large     | Control   | Helpers         | 4          | -3.3792  | 4.86     | -0.69488 | 538         | 1.000 |
| Large      | Treatment | Helpers | 24         | -          | Large     | Treatment | Breeding Female | -0.1       | -14.4700 | 4.50     | -3.21748 | 550         | 1.000 |
| Large      | Treatment | Helpers | 24         | -          | Large     | Treatment | Breeding Female | 0.1        | -14.2214 | 4.50     | -3.16347 | 549         | 1.000 |
| Large      | Treatment | Helpers | 24         | -          | Large     | Treatment | Breeding Female | 4          | 1.5911   | 4.50     | 0.35394  | 549         | 1.000 |
| Large      | Treatment | Helpers | 24         | -          | Large     | Treatment | Breeding Male   | -0.1       | -20.0325 | 4.50     | -4.45433 | 550         | 0.012 |
| Large      | Treatment | Helpers | 24         | -          | Large     | Treatment | Breeding Male   | 0.1        | -23.4714 | 4.50     | -5.22108 | 549         | <.001 |
| Large      | Treatment | Helpers | 24         | -          | Large     | Treatment | Breeding Male   | 4          | -43.7214 | 4.50     | -9.72560 | 549         | <.001 |
| Large      | Treatment | Helpers | 24         | -          | Large     | Treatment | Helpers         | -0.1       | -2.0928  | 4.50     | -0.46534 | 550         | 1.000 |
| Large      | Treatment | Helpers | 24         | -          | Large     | Treatment | Helpers         | 0.1        | -1.5956  | 4.50     | -0.35494 | 549         | 1.000 |
| Large      | Treatment | Helpers | 24         | -          | Large     | Treatment | Helpers         | 4          | -1.0844  | 4.50     | -0.24123 | 549         | 1.000 |
| Large      | Treatment | Helpers | 24         | -          | Small     | Control   | Breeding Female | -0.1       | -6.1444  | 4.86     | -1.26349 | 538         | 1.000 |
| Large      | Treatment | Helpers | 24         | -          | Small     | Control   | Breeding Female | 0.1        | -8.8111  | 4.86     | -1.81185 | 538         | 1.000 |
| Large      | Treatment | Helpers | 24         | -          | Small     | Control   | Breeding Female | 4          | -6.9777  | 4.86     | -1.43485 | 538         | 1.000 |
| Large      | Treatment | Helpers | 24         | -          | Small     | Control   | Breeding Male   | -0.1       | -15.9777 | 4.86     | -3.28555 | 538         | 1.000 |
| Large      | Treatment | Helpers | 24         | -          | Small     | Control   | Breeding Male   | 0.1        | -22.5611 | 4.86     | -4.63930 | 538         | 0.005 |
| Large      | Treatment | Helpers | 24         | -          | Small     | Control   | Breeding Male   | 4          | -15.8111 | 4.86     | -3.25128 | 538         | 1.000 |
| Large      | Treatment | Helpers | 24         | -          | Small     | Control   | Helpers         | -0.1       | -2.0750  | 4.86     | -0.42668 | 538         | 1.000 |
| Large      | Treatment | Helpers | 24         | -          | Small     | Control   | Helpers         | 0.1        | 0.4181   | 4.86     | 0.08597  | 538         | 1.000 |
| Large      | Treatment | Helpers | 24         | -          | Small     | Control   | Helpers         | 24         | -1.5125  | 4.86     | -0.31101 | 538         | 1.000 |
| Large      | Treatment | Helpers | 24         | -          | Small     | Control   | Helpers         | 4          | -1.8875  | 4.86     | -0.38812 | 538         | 1.000 |
| Large      | Treatment | Helpers | 24         | -          | Small     | Treatment | Breeding Female | -0.1       | -5.5714  | 4.87     | -1.14394 | 544         | 1.000 |
| Large      | Treatment | Helpers | 24         | -          | Small     | Treatment | Breeding Female | 0.1        | 6.1804   | 4.87     | 1.26894  | 543         | 1.000 |
| Large      | Treatment | Helpers | 24         | -          | Small     | Treatment | Breeding Female | 4          | -1.0696  | 4.87     | -0.21960 | 543         | 1.000 |
| Large      | Treatment | Helpers | 24         | -          | Small     | Treatment | Breeding Male   | -0.1       | -11.9880 | 4.87     | -2.46144 | 544         | 1.000 |
| Large      | Treatment | Helpers | 24         | -          | Small     | Treatment | Breeding Male   | 0.1        | -45.9029 | 4.87     | -9.42461 | 543         | <.001 |
| Large      | Treatment | Helpers | 24         | -          | Small     | Treatment | Breeding Male   | 4          | -22.9863 | 4.87     | -4.71945 | 543         | 0.003 |
| Large      | Treatment | Helpers | 24         | -          | Small     | Treatment | Helpers         | -0.1       | -2.9672  | 4.87     | -0.60924 | 544         | 1.000 |
| Large      | Treatment | Helpers | 24         | -          | Small     | Treatment | Helpers         | 0.1        | 3.8887   | 4.87     | 0.79842  | 543         | 1.000 |
| Large      | Treatment | Helpers | 24         | -          | Small     | Treatment | Helpers         | 4          | -0.4238  | 4.87     | -0.08700 | 543         | 1.000 |
| Large      | Treatment | Helpers | 4          | -          | Large     | Control   | Breeding Female | -0.1       | -9.5600  | 4.86     | -1.96584 | 538         | 1.000 |
| Large      | Treatment | Helpers | 4          | -          | Large     | Control   | Breeding Female | 0.1        | -14.5600 | 4.86     | -2.99401 | 538         | 1.000 |

Post Hoc Comparisons - Group Size \* Treatment \* Subject \* Time Point

| Comparison |           |                 |            |            |           |                 |            |            |      |          |     |             |
|------------|-----------|-----------------|------------|------------|-----------|-----------------|------------|------------|------|----------|-----|-------------|
| Group Size | Treatment | Subject         | Time Point | Group Size | Treatment | Subject         | Time Point | Difference | SE   | t        | df  | Pbonferroni |
| Large      | Treatment | Helpers         | 4          | - Large    | Control   | Breeding Male   | -0.1       | -12.6433   | 4.86 | -2.59988 | 538 | 1.000       |
| Large      | Treatment | Helpers         | 4          | - Large    | Control   | Breeding Male   | 0.1        | -13.8100   | 4.86 | -2.83978 | 538 | 1.000       |
| Large      | Treatment | Helpers         | 4          | - Large    | Control   | Helpers         | -0.1       | -2.0388    | 4.86 | -0.41925 | 538 | 1.000       |
| Large      | Treatment | Helpers         | 4          | - Large    | Control   | Helpers         | 0.1        | -1.0546    | 4.86 | -0.21686 | 538 | 1.000       |
| Large      | Treatment | Helpers         | 4          | - Large    | Control   | Helpers         | 4          | -2.2948    | 4.86 | -0.47188 | 538 | 1.000       |
| Large      | Treatment | Helpers         | 4          | - Large    | Treatment | Breeding Female | -0.1       | -13.3856   | 4.50 | -2.97635 | 550 | 1.000       |
| Large      | Treatment | Helpers         | 4          | - Large    | Treatment | Breeding Female | 0.1        | -13.1369   | 4.50 | -2.92224 | 549 | 1.000       |
| Large      | Treatment | Helpers         | 4          | - Large    | Treatment | Breeding Male   | -0.1       | -18.9481   | 4.50 | -4.21320 | 550 | 0.033       |
| Large      | Treatment | Helpers         | 4          | - Large    | Treatment | Breeding Male   | 0.1        | -22.3869   | 4.50 | -4.97985 | 549 | <.001       |
| Large      | Treatment | Helpers         | 4          | - Large    | Treatment | Helpers         | -0.1       | -1.0083    | 4.50 | -0.22421 | 550 | 1.000       |
| Large      | Treatment | Helpers         | 4          | - Large    | Treatment | Helpers         | 0.1        | -0.5112    | 4.50 | -0.11371 | 549 | 1.000       |
| Large      | Treatment | Helpers         | 4          | - Small    | Control   | Breeding Female | -0.1       | -5.0600    | 4.86 | -1.04049 | 538 | 1.000       |
| Large      | Treatment | Helpers         | 4          | - Small    | Control   | Breeding Female | 0.1        | -7.7266    | 4.86 | -1.58885 | 538 | 1.000       |
| Large      | Treatment | Helpers         | 4          | - Small    | Control   | Breeding Male   | -0.1       | -14.8933   | 4.86 | -3.06255 | 538 | 1.000       |
| Large      | Treatment | Helpers         | 4          | - Small    | Control   | Breeding Male   | 0.1        | -21.4766   | 4.86 | -4.41630 | 538 | 0.014       |
| Large      | Treatment | Helpers         | 4          | - Small    | Control   | Helpers         | -0.1       | -0.9905    | 4.86 | -0.20368 | 538 | 1.000       |
| Large      | Treatment | Helpers         | 4          | - Small    | Control   | Helpers         | 0.1        | 1.5025     | 4.86 | 0.30897  | 538 | 1.000       |
| Large      | Treatment | Helpers         | 4          | - Small    | Control   | Helpers         | 4          | -0.8030    | 4.86 | -0.16513 | 538 | 1.000       |
| Large      | Treatment | Helpers         | 4          | - Small    | Treatment | Breeding Female | -0.1       | -4.4869    | 4.87 | -0.92128 | 544 | 1.000       |
| Large      | Treatment | Helpers         | 4          | - Small    | Treatment | Breeding Female | 0.1        | 7.2649     | 4.87 | 1.49159  | 543 | 1.000       |
| Large      | Treatment | Helpers         | 4          | - Small    | Treatment | Breeding Male   | -0.1       | -10.9036   | 4.87 | -2.23877 | 544 | 1.000       |
| Large      | Treatment | Helpers         | 4          | - Small    | Treatment | Breeding Male   | 0.1        | -44.8185   | 4.87 | -9.20195 | 543 | <.001       |
| Large      | Treatment | Helpers         | 4          | - Small    | Treatment | Helpers         | -0.1       | -1.8828    | 4.87 | -0.38658 | 544 | 1.000       |
| Large      | Treatment | Helpers         | 4          | - Small    | Treatment | Helpers         | 0.1        | 4.9732     | 4.87 | 1.02108  | 543 | 1.000       |
| Small      | Control   | Breeding Female | -0.1       | - Large    | Control   | Breeding Female | -0.1       | -4.5000    | 5.20 | -0.86588 | 536 | 1.000       |
| Small      | Control   | Breeding Female | -0.1       | - Large    | Control   | Breeding Male   | -0.1       | -7.5833    | 5.20 | -1.45918 | 536 | 1.000       |
| Small      | Control   | Breeding Female | -0.1       | - Large    | Control   | Helpers         | -0.1       | 3.0211     | 5.20 | 0.58132  | 536 | 1.000       |
| Small      | Control   | Breeding Female | -0.1       | - Large    | Treatment | Breeding Male   | -0.1       | -13.8881   | 4.86 | -2.85547 | 538 | 1.000       |
| Small      | Control   | Breeding Female | -0.1       | - Large    | Treatment | Helpers         | -0.1       | 4.0516     | 4.86 | 0.83303  | 538 | 1.000       |
| Small      | Control   | Breeding Female | -0.1       | - Small    | Control   | Breeding Male   | -0.1       | -9.8333    | 5.19 | -1.89432 | 549 | 1.000       |
| Small      | Control   | Breeding Female | -0.1       | - Small    | Control   | Helpers         | -0.1       | 4.0694     | 5.19 | 0.78395  | 549 | 1.000       |
| Small      | Control   | Breeding Female | -0.1       | - Small    | Treatment | Breeding Male   | -0.1       | -5.8436    | 5.20 | -1.12358 | 539 | 1.000       |
| Small      | Control   | Breeding Female | -0.1       | - Small    | Treatment | Helpers         | -0.1       | 3.1772     | 5.20 | 0.61089  | 539 | 1.000       |
| Small      | Control   | Breeding Female | 0.1        | - Large    | Control   | Breeding Female | -0.1       | -1.8333    | 5.20 | -0.35277 | 536 | 1.000       |
| Small      | Control   | Breeding Female | 0.1        | - Large    | Control   | Breeding Female | 0.1        | -6.8333    | 5.20 | -1.31486 | 536 | 1.000       |
| Small      | Control   | Breeding Female | 0.1        | - Large    | Control   | Breeding Male   | -0.1       | -4.9167    | 5.20 | -0.94606 | 536 | 1.000       |
| Small      | Control   | Breeding Female | 0.1        | - Large    | Control   | Breeding Male   | 0.1        | -6.0833    | 5.20 | -1.17055 | 536 | 1.000       |
| Small      | Control   | Breeding Female | 0.1        | - Large    | Control   | Helpers         | -0.1       | 5.6878     | 5.20 | 1.09444  | 536 | 1.000       |



Post Hoc Comparisons - Group Size \* Treatment \* Subject \* Time Point

| Comparison |           |                 |            |            |           |           |                 | Difference | SE       | t    | df       | Pbonferroni |       |
|------------|-----------|-----------------|------------|------------|-----------|-----------|-----------------|------------|----------|------|----------|-------------|-------|
| Group Size | Treatment | Subject         | Time Point | Group Size | Treatment | Subject   | Time Point      |            |          |      |          |             |       |
| Small      | Control   | Breeding Female | 0.1        | -          | Large     | Control   | Helpers         | 0.1        | 6.6720   | 5.20 | 1.28382  | 536         | 1.000 |
| Small      | Control   | Breeding Female | 0.1        | -          | Large     | Treatment | Breeding Female | -0.1       | -5.6589  | 4.86 | -1.16351 | 538         | 1.000 |
| Small      | Control   | Breeding Female | 0.1        | -          | Large     | Treatment | Breeding Male   | -0.1       | -11.2214 | 4.86 | -2.30719 | 538         | 1.000 |
| Small      | Control   | Breeding Female | 0.1        | -          | Large     | Treatment | Breeding Male   | 0.1        | -14.6603 | 4.86 | -3.01464 | 538         | 1.000 |
| Small      | Control   | Breeding Female | 0.1        | -          | Large     | Treatment | Helpers         | -0.1       | 6.7183   | 4.86 | 1.38132  | 538         | 1.000 |
| Small      | Control   | Breeding Female | 0.1        | -          | Large     | Treatment | Helpers         | 0.1        | 7.2155   | 4.86 | 1.48374  | 538         | 1.000 |
| Small      | Control   | Breeding Female | 0.1        | -          | Small     | Control   | Breeding Female | -0.1       | 2.6667   | 5.19 | 0.51371  | 549         | 1.000 |
| Small      | Control   | Breeding Female | 0.1        | -          | Small     | Control   | Breeding Male   | -0.1       | -7.1667  | 5.19 | -1.38061 | 549         | 1.000 |
| Small      | Control   | Breeding Female | 0.1        | -          | Small     | Control   | Breeding Male   | 0.1        | -13.7500 | 5.19 | -2.64884 | 549         | 1.000 |
| Small      | Control   | Breeding Female | 0.1        | -          | Small     | Control   | Helpers         | -0.1       | 6.7361   | 5.19 | 1.29766  | 549         | 1.000 |
| Small      | Control   | Breeding Female | 0.1        | -          | Small     | Control   | Helpers         | 0.1        | 9.2292   | 5.19 | 1.77793  | 549         | 1.000 |
| Small      | Control   | Breeding Female | 0.1        | -          | Small     | Treatment | Breeding Female | -0.1       | 3.2397   | 5.20 | 0.62291  | 539         | 1.000 |
| Small      | Control   | Breeding Female | 0.1        | -          | Small     | Treatment | Breeding Male   | -0.1       | -3.1770  | 5.20 | -0.61085 | 539         | 1.000 |
| Small      | Control   | Breeding Female | 0.1        | -          | Small     | Treatment | Breeding Male   | 0.1        | -37.0918 | 5.20 | -7.13331 | 539         | <.001 |
| Small      | Control   | Breeding Female | 0.1        | -          | Small     | Treatment | Helpers         | -0.1       | 5.8439   | 5.20 | 1.12363  | 539         | 1.000 |
| Small      | Control   | Breeding Female | 0.1        | -          | Small     | Treatment | Helpers         | 0.1        | 12.6998  | 5.20 | 2.44236  | 539         | 1.000 |
| Small      | Control   | Breeding Female | 24         | -          | Large     | Control   | Breeding Female | -0.1       | -3.7500  | 5.20 | -0.72157 | 536         | 1.000 |
| Small      | Control   | Breeding Female | 24         | -          | Large     | Control   | Breeding Female | 0.1        | -8.7500  | 5.20 | -1.68366 | 536         | 1.000 |
| Small      | Control   | Breeding Female | 24         | -          | Large     | Control   | Breeding Female | 24         | -5.8333  | 5.20 | -1.12244 | 536         | 1.000 |
| Small      | Control   | Breeding Female | 24         | -          | Large     | Control   | Breeding Female | 4          | -5.0000  | 5.20 | -0.96209 | 536         | 1.000 |
| Small      | Control   | Breeding Female | 24         | -          | Large     | Control   | Breeding Male   | -0.1       | -6.8333  | 5.20 | -1.31486 | 536         | 1.000 |
| Small      | Control   | Breeding Female | 24         | -          | Large     | Control   | Breeding Male   | 0.1        | -8.0000  | 5.20 | -1.53935 | 536         | 1.000 |
| Small      | Control   | Breeding Female | 24         | -          | Large     | Control   | Breeding Male   | 24         | -4.2500  | 5.20 | -0.81778 | 536         | 1.000 |
| Small      | Control   | Breeding Female | 24         | -          | Large     | Control   | Breeding Male   | 4          | -4.3333  | 5.20 | -0.83381 | 536         | 1.000 |
| Small      | Control   | Breeding Female | 24         | -          | Large     | Control   | Helpers         | -0.1       | 3.7711   | 5.20 | 0.72564  | 536         | 1.000 |
| Small      | Control   | Breeding Female | 24         | -          | Large     | Control   | Helpers         | 0.1        | 4.7554   | 5.20 | 0.91502  | 536         | 1.000 |
| Small      | Control   | Breeding Female | 24         | -          | Large     | Control   | Helpers         | 24         | 3.5946   | 5.20 | 0.69168  | 536         | 1.000 |
| Small      | Control   | Breeding Female | 24         | -          | Large     | Control   | Helpers         | 4          | 3.5152   | 5.20 | 0.67639  | 536         | 1.000 |
| Small      | Control   | Breeding Female | 24         | -          | Large     | Treatment | Breeding Female | -0.1       | -7.5756  | 4.86 | -1.55758 | 538         | 1.000 |
| Small      | Control   | Breeding Female | 24         | -          | Large     | Treatment | Breeding Female | 0.1        | -7.3269  | 4.86 | -1.50666 | 538         | 1.000 |
| Small      | Control   | Breeding Female | 24         | -          | Large     | Treatment | Breeding Female | 4          | 8.4856   | 4.86 | 1.74491  | 538         | 1.000 |
| Small      | Control   | Breeding Female | 24         | -          | Large     | Treatment | Breeding Male   | -0.1       | -13.1381 | 4.86 | -2.70126 | 538         | 1.000 |
| Small      | Control   | Breeding Female | 24         | -          | Large     | Treatment | Breeding Male   | 0.1        | -16.5769 | 4.86 | -3.40876 | 538         | 0.791 |
| Small      | Control   | Breeding Female | 24         | -          | Large     | Treatment | Breeding Male   | 24         | -32.6394 | 4.86 | -6.71174 | 538         | <.001 |

Post Hoc Comparisons - Group Size \* Treatment \* Subject \* Time Point

|            |           |                 |            | Comparison |           |           |                 | Difference | SE       | t    | df       | Pbonferroni |       |
|------------|-----------|-----------------|------------|------------|-----------|-----------|-----------------|------------|----------|------|----------|-------------|-------|
| Group Size | Treatment | Subject         | Time Point | Group Size | Treatment | Subject   | Time Point      |            |          |      |          |             |       |
| Small      | Control   | Breeding Female | 24         | -          | Large     | Treatment | Breeding Male   | 4          | -36.8269 | 4.86 | -7.57283 | 538         | <.001 |
| Small      | Control   | Breeding Female | 24         | -          | Large     | Treatment | Helpers         | -0.1       | 4.8016   | 4.86 | 0.98724  | 538         | 1.000 |
| Small      | Control   | Breeding Female | 24         | -          | Large     | Treatment | Helpers         | 0.1        | 5.2988   | 4.86 | 1.08961  | 538         | 1.000 |
| Small      | Control   | Breeding Female | 24         | -          | Large     | Treatment | Helpers         | 24         | 6.8944   | 4.86 | 1.41772  | 538         | 1.000 |
| Small      | Control   | Breeding Female | 24         | -          | Large     | Treatment | Helpers         | 4          | 5.8100   | 4.86 | 1.19472  | 538         | 1.000 |
| Small      | Control   | Breeding Female | 24         | -          | Small     | Control   | Breeding Female | -0.1       | 0.7500   | 5.19 | 0.14448  | 549         | 1.000 |
| Small      | Control   | Breeding Female | 24         | -          | Small     | Control   | Breeding Female | 0.1        | -1.9167  | 5.19 | -0.36923 | 549         | 1.000 |
| Small      | Control   | Breeding Female | 24         | -          | Small     | Control   | Breeding Female | 4          | -0.0833  | 5.19 | -0.01605 | 549         | 1.000 |
| Small      | Control   | Breeding Female | 24         | -          | Small     | Control   | Breeding Male   | -0.1       | -9.0833  | 5.19 | -1.74984 | 549         | 1.000 |
| Small      | Control   | Breeding Female | 24         | -          | Small     | Control   | Breeding Male   | 0.1        | -15.6667 | 5.19 | -3.01807 | 549         | 1.000 |
| Small      | Control   | Breeding Female | 24         | -          | Small     | Control   | Breeding Male   | 24         | -10.4167 | 5.19 | -2.00670 | 549         | 1.000 |
| Small      | Control   | Breeding Female | 24         | -          | Small     | Control   | Breeding Male   | 4          | -8.9167  | 5.19 | -1.71773 | 549         | 1.000 |
| Small      | Control   | Breeding Female | 24         | -          | Small     | Control   | Helpers         | -0.1       | 4.8194   | 5.19 | 0.92843  | 549         | 1.000 |
| Small      | Control   | Breeding Female | 24         | -          | Small     | Control   | Helpers         | 0.1        | 7.3125   | 5.19 | 1.40870  | 549         | 1.000 |
| Small      | Control   | Breeding Female | 24         | -          | Small     | Control   | Helpers         | 24         | 5.3819   | 5.19 | 1.03679  | 549         | 1.000 |
| Small      | Control   | Breeding Female | 24         | -          | Small     | Control   | Helpers         | 4          | 5.0069   | 5.19 | 0.96455  | 549         | 1.000 |
| Small      | Control   | Breeding Female | 24         | -          | Small     | Treatment | Breeding Female | -0.1       | 1.3230   | 5.20 | 0.25439  | 539         | 1.000 |
| Small      | Control   | Breeding Female | 24         | -          | Small     | Treatment | Breeding Female | 0.1        | 13.0748  | 5.20 | 2.51448  | 539         | 1.000 |
| Small      | Control   | Breeding Female | 24         | -          | Small     | Treatment | Breeding Female | 4          | 5.8248   | 5.20 | 1.12020  | 539         | 1.000 |
| Small      | Control   | Breeding Female | 24         | -          | Small     | Treatment | Breeding Male   | -0.1       | -5.0936  | 5.20 | -0.97938 | 539         | 1.000 |
| Small      | Control   | Breeding Female | 24         | -          | Small     | Treatment | Breeding Male   | 0.1        | -39.0085 | 5.20 | -7.50191 | 539         | <.001 |
| Small      | Control   | Breeding Female | 24         | -          | Small     | Treatment | Breeding Male   | 24         | -18.2585 | 5.20 | -3.51138 | 539         | 0.545 |
| Small      | Control   | Breeding Female | 24         | -          | Small     | Treatment | Breeding Male   | 4          | -16.0918 | 5.20 | -3.09470 | 539         | 1.000 |
| Small      | Control   | Breeding Female | 24         | -          | Small     | Treatment | Helpers         | -0.1       | 3.9272   | 5.20 | 0.75510  | 539         | 1.000 |
| Small      | Control   | Breeding Female | 24         | -          | Small     | Treatment | Helpers         | 0.1        | 10.7832  | 5.20 | 2.07376  | 539         | 1.000 |
| Small      | Control   | Breeding Female | 24         | -          | Small     | Treatment | Helpers         | 24         | 8.1582   | 5.20 | 1.56893  | 539         | 1.000 |
| Small      | Control   | Breeding Female | 24         | -          | Small     | Treatment | Helpers         | 4          | 6.4707   | 5.20 | 1.24440  | 539         | 1.000 |
| Small      | Control   | Breeding Female | 4          | -          | Large     | Control   | Breeding Female | -0.1       | -3.6667  | 5.20 | -0.70554 | 536         | 1.000 |
| Small      | Control   | Breeding Female | 4          | -          | Large     | Control   | Breeding Female | 0.1        | -8.6667  | 5.20 | -1.66763 | 536         | 1.000 |
| Small      | Control   | Breeding Female | 4          | -          | Large     | Control   | Breeding Female | 4          | -4.9167  | 5.20 | -0.94606 | 536         | 1.000 |
| Small      | Control   | Breeding Female | 4          | -          | Large     | Control   | Breeding Male   | -0.1       | -6.7500  | 5.20 | -1.29883 | 536         | 1.000 |
| Small      | Control   | Breeding Female | 4          | -          | Large     | Control   | Breeding Male   | 0.1        | -7.9167  | 5.20 | -1.52332 | 536         | 1.000 |
| Small      | Control   | Breeding Female | 4          | -          | Large     | Control   | Breeding Male   | 4          | -4.2500  | 5.20 | -0.81778 | 536         | 1.000 |
| Small      | Control   | Breeding Female | 4          | -          | Large     | Control   | Helpers         | -0.1       | 3.8545   | 5.20 | 0.74167  | 536         | 1.000 |

Post Hoc Comparisons - Group Size \* Treatment \* Subject \* Time Point

| Comparison |           |                 |            |            |           |                 |            |            |      |          |     |             |
|------------|-----------|-----------------|------------|------------|-----------|-----------------|------------|------------|------|----------|-----|-------------|
| Group Size | Treatment | Subject         | Time Point | Group Size | Treatment | Subject         | Time Point | Difference | SE   | t        | df  | Pbonferroni |
| Small      | Control   | Breeding Female | 4          | - Large    | Control   | Helpers         | 0.1        | 4.8387     | 5.20 | 0.93105  | 536 | 1.000       |
| Small      | Control   | Breeding Female | 4          | - Large    | Control   | Helpers         | 4          | 3.5985     | 5.20 | 0.69242  | 536 | 1.000       |
| Small      | Control   | Breeding Female | 4          | - Large    | Treatment | Breeding Female | -0.1       | -7.4923    | 4.86 | -1.54045 | 538 | 1.000       |
| Small      | Control   | Breeding Female | 4          | - Large    | Treatment | Breeding Female | 0.1        | -7.2436    | 4.86 | -1.48952 | 538 | 1.000       |
| Small      | Control   | Breeding Female | 4          | - Large    | Treatment | Breeding Male   | -0.1       | -13.0548   | 4.86 | -2.68413 | 538 | 1.000       |
| Small      | Control   | Breeding Female | 4          | - Large    | Treatment | Breeding Male   | 0.1        | -16.4936   | 4.86 | -3.39163 | 538 | 0.841       |
| Small      | Control   | Breeding Female | 4          | - Large    | Treatment | Breeding Male   | 4          | -36.7436   | 4.86 | -7.55569 | 538 | <.001       |
| Small      | Control   | Breeding Female | 4          | - Large    | Treatment | Helpers         | -0.1       | 4.8850     | 4.86 | 1.00437  | 538 | 1.000       |
| Small      | Control   | Breeding Female | 4          | - Large    | Treatment | Helpers         | 0.1        | 5.3821     | 4.86 | 1.10674  | 538 | 1.000       |
| Small      | Control   | Breeding Female | 4          | - Large    | Treatment | Helpers         | 4          | 5.8933     | 4.86 | 1.21185  | 538 | 1.000       |
| Small      | Control   | Breeding Female | 4          | - Small    | Control   | Breeding Female | -0.1       | 0.8333     | 5.19 | 0.16054  | 549 | 1.000       |
| Small      | Control   | Breeding Female | 4          | - Small    | Control   | Breeding Female | 0.1        | -1.8333    | 5.19 | -0.35318 | 549 | 1.000       |
| Small      | Control   | Breeding Female | 4          | - Small    | Control   | Breeding Male   | -0.1       | -9.0000    | 5.19 | -1.73379 | 549 | 1.000       |
| Small      | Control   | Breeding Female | 4          | - Small    | Control   | Breeding Male   | 0.1        | -15.5833   | 5.19 | -3.00202 | 549 | 1.000       |
| Small      | Control   | Breeding Female | 4          | - Small    | Control   | Breeding Male   | 4          | -8.8333    | 5.19 | -1.70168 | 549 | 1.000       |
| Small      | Control   | Breeding Female | 4          | - Small    | Control   | Helpers         | -0.1       | 4.9028     | 5.19 | 0.94449  | 549 | 1.000       |
| Small      | Control   | Breeding Female | 4          | - Small    | Control   | Helpers         | 0.1        | 7.3958     | 5.19 | 1.42476  | 549 | 1.000       |
| Small      | Control   | Breeding Female | 4          | - Small    | Control   | Helpers         | 4          | 5.0903     | 5.19 | 0.98061  | 549 | 1.000       |
| Small      | Control   | Breeding Female | 4          | - Small    | Treatment | Breeding Female | -0.1       | 1.4064     | 5.20 | 0.27041  | 539 | 1.000       |
| Small      | Control   | Breeding Female | 4          | - Small    | Treatment | Breeding Female | 0.1        | 13.1582    | 5.20 | 2.53051  | 539 | 1.000       |
| Small      | Control   | Breeding Female | 4          | - Small    | Treatment | Breeding Male   | -0.1       | -5.0103    | 5.20 | -0.96335 | 539 | 1.000       |
| Small      | Control   | Breeding Female | 4          | - Small    | Treatment | Breeding Male   | 0.1        | -38.9252   | 5.20 | -7.48589 | 539 | <.001       |
| Small      | Control   | Breeding Female | 4          | - Small    | Treatment | Breeding Male   | 4          | -16.0085   | 5.20 | -3.07867 | 539 | 1.000       |
| Small      | Control   | Breeding Female | 4          | - Small    | Treatment | Helpers         | -0.1       | 4.0105     | 5.20 | 0.77112  | 539 | 1.000       |
| Small      | Control   | Breeding Female | 4          | - Small    | Treatment | Helpers         | 0.1        | 10.8665    | 5.20 | 2.08979  | 539 | 1.000       |
| Small      | Control   | Breeding Female | 4          | - Small    | Treatment | Helpers         | 4          | 6.5540     | 5.20 | 1.26043  | 539 | 1.000       |
| Small      | Control   | Breeding Male   | -0.1       | - Large    | Control   | Breeding Male   | -0.1       | 2.2500     | 5.20 | 0.43294  | 536 | 1.000       |
| Small      | Control   | Breeding Male   | -0.1       | - Large    | Control   | Helpers         | -0.1       | 12.8545    | 5.20 | 2.47344  | 536 | 1.000       |
| Small      | Control   | Breeding Male   | -0.1       | - Large    | Treatment | Helpers         | -0.1       | 13.8850    | 4.86 | 2.85482  | 538 | 1.000       |
| Small      | Control   | Breeding Male   | -0.1       | - Small    | Control   | Helpers         | -0.1       | 13.9028    | 5.19 | 2.67827  | 549 | 1.000       |
| Small      | Control   | Breeding Male   | -0.1       | - Small    | Treatment | Helpers         | -0.1       | 13.0105    | 5.20 | 2.50159  | 539 | 1.000       |
| Small      | Control   | Breeding Male   | 0.1        | - Large    | Control   | Breeding Female | -0.1       | 11.9167    | 5.20 | 2.29299  | 536 | 1.000       |
| Small      | Control   | Breeding Male   | 0.1        | - Large    | Control   | Breeding Male   | -0.1       | 8.8333     | 5.20 | 1.69970  | 536 | 1.000       |
| Small      | Control   | Breeding Male   | 0.1        | - Large    | Control   | Breeding Male   | 0.1        | 7.6667     | 5.20 | 1.47521  | 536 | 1.000       |

Post Hoc Comparisons - Group Size \* Treatment \* Subject \* Time Point

|            |           | Comparison    |            |            |           |           |                 | Difference | SE       | t    | df       | Pbonferroni |       |
|------------|-----------|---------------|------------|------------|-----------|-----------|-----------------|------------|----------|------|----------|-------------|-------|
| Group Size | Treatment | Subject       | Time Point | Group Size | Treatment | Subject   | Time Point      |            |          |      |          |             |       |
| Small      | Control   | Breeding Male | 0.1        | -          | Large     | Control   | Helpers         | -0.1       | 19.4378  | 5.20 | 3.74020  | 536         | 0.230 |
| Small      | Control   | Breeding Male | 0.1        | -          | Large     | Control   | Helpers         | 0.1        | 20.4220  | 5.20 | 3.92958  | 536         | 0.109 |
| Small      | Control   | Breeding Male | 0.1        | -          | Large     | Treatment | Breeding Female | -0.1       | 8.0911   | 4.86 | 1.66356  | 538         | 1.000 |
| Small      | Control   | Breeding Male | 0.1        | -          | Large     | Treatment | Breeding Male   | -0.1       | 2.5286   | 4.86 | 0.51988  | 538         | 1.000 |
| Small      | Control   | Breeding Male | 0.1        | -          | Large     | Treatment | Helpers         | -0.1       | 20.4683  | 4.86 | 4.20839  | 538         | 0.034 |
| Small      | Control   | Breeding Male | 0.1        | -          | Large     | Treatment | Helpers         | 0.1        | 20.9655  | 4.86 | 4.31119  | 538         | 0.022 |
| Small      | Control   | Breeding Male | 0.1        | -          | Small     | Control   | Breeding Female | -0.1       | 16.4167  | 5.19 | 3.16256  | 549         | 1.000 |
| Small      | Control   | Breeding Male | 0.1        | -          | Small     | Control   | Breeding Male   | -0.1       | 6.5833   | 5.19 | 1.26823  | 549         | 1.000 |
| Small      | Control   | Breeding Male | 0.1        | -          | Small     | Control   | Helpers         | -0.1       | 20.4861  | 5.19 | 3.94651  | 549         | 0.101 |
| Small      | Control   | Breeding Male | 0.1        | -          | Small     | Control   | Helpers         | 0.1        | 22.9792  | 5.19 | 4.42678  | 549         | 0.013 |
| Small      | Control   | Breeding Male | 0.1        | -          | Small     | Treatment | Breeding Female | -0.1       | 16.9897  | 5.20 | 3.26669  | 539         | 1.000 |
| Small      | Control   | Breeding Male | 0.1        | -          | Small     | Treatment | Breeding Male   | -0.1       | 10.5730  | 5.20 | 2.03292  | 539         | 1.000 |
| Small      | Control   | Breeding Male | 0.1        | -          | Small     | Treatment | Helpers         | -0.1       | 19.5939  | 5.20 | 3.76740  | 539         | 0.207 |
| Small      | Control   | Breeding Male | 0.1        | -          | Small     | Treatment | Helpers         | 0.1        | 26.4498  | 5.20 | 5.08669  | 539         | <.001 |
| Small      | Control   | Breeding Male | 24         | -          | Large     | Control   | Breeding Female | -0.1       | 6.6667   | 5.20 | 1.28279  | 536         | 1.000 |
| Small      | Control   | Breeding Male | 24         | -          | Large     | Control   | Breeding Female | 0.1        | 1.6667   | 5.20 | 0.32070  | 536         | 1.000 |
| Small      | Control   | Breeding Male | 24         | -          | Large     | Control   | Breeding Female | 4          | 5.4167   | 5.20 | 1.04227  | 536         | 1.000 |
| Small      | Control   | Breeding Male | 24         | -          | Large     | Control   | Breeding Male   | -0.1       | 3.5833   | 5.20 | 0.68950  | 536         | 1.000 |
| Small      | Control   | Breeding Male | 24         | -          | Large     | Control   | Breeding Male   | 0.1        | 2.4167   | 5.20 | 0.46501  | 536         | 1.000 |
| Small      | Control   | Breeding Male | 24         | -          | Large     | Control   | Breeding Male   | 24         | 6.1667   | 5.20 | 1.18658  | 536         | 1.000 |
| Small      | Control   | Breeding Male | 24         | -          | Large     | Control   | Breeding Male   | 4          | 6.0833   | 5.20 | 1.17055  | 536         | 1.000 |
| Small      | Control   | Breeding Male | 24         | -          | Large     | Control   | Helpers         | -0.1       | 14.1878  | 5.20 | 2.73000  | 536         | 1.000 |
| Small      | Control   | Breeding Male | 24         | -          | Large     | Control   | Helpers         | 0.1        | 15.1720  | 5.20 | 2.91938  | 536         | 1.000 |
| Small      | Control   | Breeding Male | 24         | -          | Large     | Control   | Helpers         | 24         | 14.0113  | 5.20 | 2.69604  | 536         | 1.000 |
| Small      | Control   | Breeding Male | 24         | -          | Large     | Control   | Helpers         | 4          | 13.9318  | 5.20 | 2.68075  | 536         | 1.000 |
| Small      | Control   | Breeding Male | 24         | -          | Large     | Treatment | Breeding Female | -0.1       | 2.8411   | 4.86 | 0.58414  | 538         | 1.000 |
| Small      | Control   | Breeding Male | 24         | -          | Large     | Treatment | Breeding Female | 0.1        | 3.0897   | 4.86 | 0.63535  | 538         | 1.000 |
| Small      | Control   | Breeding Male | 24         | -          | Large     | Treatment | Breeding Female | 4          | 18.9022  | 4.86 | 3.88692  | 538         | 0.129 |
| Small      | Control   | Breeding Male | 24         | -          | Large     | Treatment | Breeding Male   | -0.1       | -2.7214  | 4.86 | -0.55954 | 538         | 1.000 |
| Small      | Control   | Breeding Male | 24         | -          | Large     | Treatment | Breeding Male   | 0.1        | -6.1603  | 4.86 | -1.26676 | 538         | 1.000 |
| Small      | Control   | Breeding Male | 24         | -          | Large     | Treatment | Breeding Male   | 4          | -26.4103 | 4.86 | -5.43082 | 538         | <.001 |
| Small      | Control   | Breeding Male | 24         | -          | Large     | Treatment | Helpers         | -0.1       | 15.2183  | 4.86 | 3.12896  | 538         | 1.000 |
| Small      | Control   | Breeding Male | 24         | -          | Large     | Treatment | Helpers         | 0.1        | 15.7155  | 4.86 | 3.23162  | 538         | 1.000 |
| Small      | Control   | Breeding Male | 24         | -          | Large     | Treatment | Helpers         | 24         | 17.3111  | 4.86 | 3.55973  | 538         | 0.456 |

Post Hoc Comparisons - Group Size \* Treatment \* Subject \* Time Point

| Comparison |           |               |            |            |           |           |                 |            |          |      |          |             |       |
|------------|-----------|---------------|------------|------------|-----------|-----------|-----------------|------------|----------|------|----------|-------------|-------|
| Group Size | Treatment | Subject       | Time Point | Group Size | Treatment | Subject   | Time Point      | Difference | SE       | t    | df       | Pbonferroni |       |
| Small      | Control   | Breeding Male | 24         | -          | Large     | Treatment | Helpers         | 4          | 16.2266  | 4.86 | 3.33673  | 538         | 1.000 |
| Small      | Control   | Breeding Male | 24         | -          | Small     | Control   | Breeding Female | -0.1       | 11.1667  | 5.19 | 2.15118  | 549         | 1.000 |
| Small      | Control   | Breeding Male | 24         | -          | Small     | Control   | Breeding Female | 0.1        | 8.5000   | 5.19 | 1.63747  | 549         | 1.000 |
| Small      | Control   | Breeding Male | 24         | -          | Small     | Control   | Breeding Female | 4          | 10.3333  | 5.19 | 1.99064  | 549         | 1.000 |
| Small      | Control   | Breeding Male | 24         | -          | Small     | Control   | Breeding Male   | -0.1       | 1.3333   | 5.19 | 0.25686  | 549         | 1.000 |
| Small      | Control   | Breeding Male | 24         | -          | Small     | Control   | Breeding Male   | 0.1        | -5.2500  | 5.19 | -1.01138 | 549         | 1.000 |
| Small      | Control   | Breeding Male | 24         | -          | Small     | Control   | Breeding Male   | 4          | 1.5000   | 5.19 | 0.28896  | 549         | 1.000 |
| Small      | Control   | Breeding Male | 24         | -          | Small     | Control   | Helpers         | -0.1       | 15.2361  | 5.19 | 2.93513  | 549         | 1.000 |
| Small      | Control   | Breeding Male | 24         | -          | Small     | Control   | Helpers         | 0.1        | 17.7292  | 5.19 | 3.41540  | 549         | 0.772 |
| Small      | Control   | Breeding Male | 24         | -          | Small     | Control   | Helpers         | 24         | 15.7986  | 5.19 | 3.04349  | 549         | 1.000 |
| Small      | Control   | Breeding Male | 24         | -          | Small     | Control   | Helpers         | 4          | 15.4236  | 5.19 | 2.97125  | 549         | 1.000 |
| Small      | Control   | Breeding Male | 24         | -          | Small     | Treatment | Breeding Female | -0.1       | 11.7397  | 5.20 | 2.25725  | 539         | 1.000 |
| Small      | Control   | Breeding Male | 24         | -          | Small     | Treatment | Breeding Female | 0.1        | 23.4915  | 5.20 | 4.51776  | 539         | 0.009 |
| Small      | Control   | Breeding Male | 24         | -          | Small     | Treatment | Breeding Female | 4          | 16.2415  | 5.20 | 3.12348  | 539         | 1.000 |
| Small      | Control   | Breeding Male | 24         | -          | Small     | Treatment | Breeding Male   | -0.1       | 5.3230   | 5.20 | 1.02348  | 539         | 1.000 |
| Small      | Control   | Breeding Male | 24         | -          | Small     | Treatment | Breeding Male   | 0.1        | -28.5918 | 5.20 | -5.49864 | 539         | <.001 |
| Small      | Control   | Breeding Male | 24         | -          | Small     | Treatment | Breeding Male   | 4          | -5.6752  | 5.20 | -1.09142 | 539         | 1.000 |
| Small      | Control   | Breeding Male | 24         | -          | Small     | Treatment | Helpers         | -0.1       | 14.3439  | 5.20 | 2.75796  | 539         | 1.000 |
| Small      | Control   | Breeding Male | 24         | -          | Small     | Treatment | Helpers         | 0.1        | 21.1998  | 5.20 | 4.07704  | 539         | 0.059 |
| Small      | Control   | Breeding Male | 24         | -          | Small     | Treatment | Helpers         | 24         | 18.5748  | 5.20 | 3.57221  | 539         | 0.435 |
| Small      | Control   | Breeding Male | 24         | -          | Small     | Treatment | Helpers         | 4          | 16.8873  | 5.20 | 3.24768  | 539         | 1.000 |
| Small      | Control   | Breeding Male | 4          | -          | Large     | Control   | Breeding Female | -0.1       | 5.1667   | 5.20 | 0.99416  | 536         | 1.000 |
| Small      | Control   | Breeding Male | 4          | -          | Large     | Control   | Breeding Female | 0.1        | 0.1667   | 5.20 | 0.03207  | 536         | 1.000 |
| Small      | Control   | Breeding Male | 4          | -          | Large     | Control   | Breeding Male   | -0.1       | 2.0833   | 5.20 | 0.40087  | 536         | 1.000 |
| Small      | Control   | Breeding Male | 4          | -          | Large     | Control   | Breeding Male   | 0.1        | 0.9167   | 5.20 | 0.17638  | 536         | 1.000 |
| Small      | Control   | Breeding Male | 4          | -          | Large     | Control   | Breeding Male   | 4          | 4.5833   | 5.20 | 0.88192  | 536         | 1.000 |
| Small      | Control   | Breeding Male | 4          | -          | Large     | Control   | Helpers         | -0.1       | 12.6878  | 5.20 | 2.44137  | 536         | 1.000 |
| Small      | Control   | Breeding Male | 4          | -          | Large     | Control   | Helpers         | 0.1        | 13.6720  | 5.20 | 2.63075  | 536         | 1.000 |
| Small      | Control   | Breeding Male | 4          | -          | Large     | Control   | Helpers         | 4          | 12.4318  | 5.20 | 2.39212  | 536         | 1.000 |
| Small      | Control   | Breeding Male | 4          | -          | Large     | Treatment | Breeding Female | -0.1       | 1.3411   | 4.86 | 0.27573  | 538         | 1.000 |
| Small      | Control   | Breeding Male | 4          | -          | Large     | Treatment | Breeding Female | 0.1        | 1.5897   | 4.86 | 0.32690  | 538         | 1.000 |
| Small      | Control   | Breeding Male | 4          | -          | Large     | Treatment | Breeding Male   | -0.1       | -4.2214  | 4.86 | -0.86795 | 538         | 1.000 |
| Small      | Control   | Breeding Male | 4          | -          | Large     | Treatment | Breeding Male   | 0.1        | -7.6603  | 4.86 | -1.57521 | 538         | 1.000 |
| Small      | Control   | Breeding Male | 4          | -          | Large     | Treatment | Helpers         | -0.1       | 13.7183  | 4.86 | 2.82055  | 538         | 1.000 |

Post Hoc Comparisons - Group Size \* Treatment \* Subject \* Time Point

| Comparison |           |               |            |            |           |                 |            |            |      |          |     |             |
|------------|-----------|---------------|------------|------------|-----------|-----------------|------------|------------|------|----------|-----|-------------|
| Group Size | Treatment | Subject       | Time Point | Group Size | Treatment | Subject         | Time Point | Difference | SE   | t        | df  | Pbonferroni |
| Small      | Control   | Breeding Male | 4          | - Large    | Treatment | Helpers         | 0.1        | 14.2155    | 4.86 | 2.92317  | 538 | 1.000       |
| Small      | Control   | Breeding Male | 4          | - Large    | Treatment | Helpers         | 4          | 14.7266    | 4.86 | 3.02828  | 538 | 1.000       |
| Small      | Control   | Breeding Male | 4          | - Small    | Control   | Breeding Female | -0.1       | 9.6667     | 5.19 | 1.86222  | 549 | 1.000       |
| Small      | Control   | Breeding Male | 4          | - Small    | Control   | Breeding Female | 0.1        | 7.0000     | 5.19 | 1.34850  | 549 | 1.000       |
| Small      | Control   | Breeding Male | 4          | - Small    | Control   | Breeding Male   | -0.1       | -0.1667    | 5.19 | -0.03211 | 549 | 1.000       |
| Small      | Control   | Breeding Male | 4          | - Small    | Control   | Breeding Male   | 0.1        | -6.7500    | 5.19 | -1.30034 | 549 | 1.000       |
| Small      | Control   | Breeding Male | 4          | - Small    | Control   | Helpers         | -0.1       | 13.7361    | 5.19 | 2.64617  | 549 | 1.000       |
| Small      | Control   | Breeding Male | 4          | - Small    | Control   | Helpers         | 0.1        | 16.2292    | 5.19 | 3.12644  | 549 | 1.000       |
| Small      | Control   | Breeding Male | 4          | - Small    | Control   | Helpers         | 4          | 13.9236    | 5.19 | 2.68229  | 549 | 1.000       |
| Small      | Control   | Breeding Male | 4          | - Small    | Treatment | Breeding Female | -0.1       | 10.2397    | 5.20 | 1.96883  | 539 | 1.000       |
| Small      | Control   | Breeding Male | 4          | - Small    | Treatment | Breeding Female | 0.1        | 21.9915    | 5.20 | 4.22929  | 539 | 0.031       |
| Small      | Control   | Breeding Male | 4          | - Small    | Treatment | Breeding Male   | -0.1       | 3.8230     | 5.20 | 0.73507  | 539 | 1.000       |
| Small      | Control   | Breeding Male | 4          | - Small    | Treatment | Breeding Male   | 0.1        | -30.0918   | 5.20 | -5.78711 | 539 | <.001       |
| Small      | Control   | Breeding Male | 4          | - Small    | Treatment | Helpers         | -0.1       | 12.8439    | 5.20 | 2.46955  | 539 | 1.000       |
| Small      | Control   | Breeding Male | 4          | - Small    | Treatment | Helpers         | 0.1        | 19.6998    | 5.20 | 3.78857  | 539 | 0.190       |
| Small      | Control   | Breeding Male | 4          | - Small    | Treatment | Helpers         | 4          | 15.3873    | 5.20 | 2.95921  | 539 | 1.000       |
| Small      | Control   | Helpers       | -0.1       | - Large    | Control   | Helpers         | -0.1       | -1.0483    | 5.20 | -0.20172 | 536 | 1.000       |
| Small      | Control   | Helpers       | 0.1        | - Large    | Control   | Breeding Female | -0.1       | -11.0625   | 5.20 | -2.12863 | 536 | 1.000       |
| Small      | Control   | Helpers       | 0.1        | - Large    | Control   | Breeding Male   | -0.1       | -14.1458   | 5.20 | -2.72192 | 536 | 1.000       |
| Small      | Control   | Helpers       | 0.1        | - Large    | Control   | Helpers         | -0.1       | -3.5414    | 5.20 | -0.68143 | 536 | 1.000       |
| Small      | Control   | Helpers       | 0.1        | - Large    | Control   | Helpers         | 0.1        | -2.5571    | 5.20 | -0.49204 | 536 | 1.000       |
| Small      | Control   | Helpers       | 0.1        | - Large    | Treatment | Breeding Female | -0.1       | -14.8881   | 4.86 | -3.06107 | 538 | 1.000       |
| Small      | Control   | Helpers       | 0.1        | - Large    | Treatment | Breeding Male   | -0.1       | -20.4506   | 4.86 | -4.20475 | 538 | 0.035       |
| Small      | Control   | Helpers       | 0.1        | - Large    | Treatment | Helpers         | -0.1       | -2.5109    | 4.86 | -0.51625 | 538 | 1.000       |
| Small      | Control   | Helpers       | 0.1        | - Small    | Control   | Breeding Female | -0.1       | -6.5625    | 5.19 | -1.26422 | 549 | 1.000       |
| Small      | Control   | Helpers       | 0.1        | - Small    | Control   | Breeding Male   | -0.1       | -16.3958   | 5.19 | -3.15854 | 549 | 1.000       |
| Small      | Control   | Helpers       | 0.1        | - Small    | Control   | Helpers         | -0.1       | -2.4931    | 5.19 | -0.48027 | 549 | 1.000       |
| Small      | Control   | Helpers       | 0.1        | - Small    | Treatment | Breeding Female | -0.1       | -5.9895    | 5.20 | -1.15162 | 539 | 1.000       |
| Small      | Control   | Helpers       | 0.1        | - Small    | Treatment | Breeding Male   | -0.1       | -12.4061   | 5.20 | -2.38538 | 539 | 1.000       |
| Small      | Control   | Helpers       | 0.1        | - Small    | Treatment | Helpers         | -0.1       | -3.3853    | 5.20 | -0.65091 | 539 | 1.000       |
| Small      | Control   | Helpers       | 24         | - Large    | Control   | Breeding Female | -0.1       | -9.1319    | 5.20 | -1.75716 | 536 | 1.000       |
| Small      | Control   | Helpers       | 24         | - Large    | Control   | Breeding Female | 0.1        | -14.1319   | 5.20 | -2.71925 | 536 | 1.000       |
| Small      | Control   | Helpers       | 24         | - Large    | Control   | Breeding Female | 4          | -10.3819   | 5.20 | -1.99768 | 536 | 1.000       |
| Small      | Control   | Helpers       | 24         | - Large    | Control   | Breeding Male   | -0.1       | -12.2153   | 5.20 | -2.35045 | 536 | 1.000       |
| Small      | Control   | Helpers       | 24         | - Large    | Control   | Breeding Male   | 0.1        | -13.3819   | 5.20 | -2.57494 | 536 | 1.000       |
| Small      | Control   | Helpers       | 24         | - Large    | Control   | Breeding Male   | 4          | -9.7153    | 5.20 | -1.86940 | 536 | 1.000       |
| Small      | Control   | Helpers       | 24         | - Large    | Control   | Helpers         | -0.1       | -1.6108    | 5.20 | -0.30995 | 536 | 1.000       |
| Small      | Control   | Helpers       | 24         | - Large    | Control   | Helpers         | 0.1        | -0.6266    | 5.20 | -0.12057 | 536 | 1.000       |

Post Hoc Comparisons - Group Size \* Treatment \* Subject \* Time Point

| Comparison |           |         |            |            |           |           |                 | Difference | SE       | t    | df       | Pbonferroni |       |
|------------|-----------|---------|------------|------------|-----------|-----------|-----------------|------------|----------|------|----------|-------------|-------|
| Group Size | Treatment | Subject | Time Point | Group Size | Treatment | Subject   | Time Point      |            |          |      |          |             |       |
| Small      | Control   | Helpers | 24         | -          | Large     | Control   | Helpers         | 24         | -1.7873  | 5.20 | -0.34391 | 536         | 1.000 |
| Small      | Control   | Helpers | 24         | -          | Large     | Control   | Helpers         | 4          | -1.8668  | 5.20 | -0.35920 | 536         | 1.000 |
| Small      | Control   | Helpers | 24         | -          | Large     | Treatment | Breeding Female | -0.1       | -12.9576 | 4.86 | -2.66414 | 538         | 1.000 |
| Small      | Control   | Helpers | 24         | -          | Large     | Treatment | Breeding Female | 0.1        | -12.7089 | 4.86 | -2.61337 | 538         | 1.000 |
| Small      | Control   | Helpers | 24         | -          | Large     | Treatment | Breeding Female | 4          | 3.1036   | 4.86 | 0.63820  | 538         | 1.000 |
| Small      | Control   | Helpers | 24         | -          | Large     | Treatment | Breeding Male   | -0.1       | -18.5201 | 4.86 | -3.80782 | 538         | 0.176 |
| Small      | Control   | Helpers | 24         | -          | Large     | Treatment | Breeding Male   | 0.1        | -21.9589 | 4.86 | -4.51547 | 538         | 0.009 |
| Small      | Control   | Helpers | 24         | -          | Large     | Treatment | Breeding Male   | 4          | -42.2089 | 4.86 | -8.67953 | 538         | <.001 |
| Small      | Control   | Helpers | 24         | -          | Large     | Treatment | Helpers         | -0.1       | -0.5803  | 4.86 | -0.11932 | 538         | 1.000 |
| Small      | Control   | Helpers | 24         | -          | Large     | Treatment | Helpers         | 0.1        | -0.0831  | 4.86 | -0.01710 | 538         | 1.000 |
| Small      | Control   | Helpers | 24         | -          | Large     | Treatment | Helpers         | 4          | 0.4280   | 4.86 | 0.08801  | 538         | 1.000 |
| Small      | Control   | Helpers | 24         | -          | Small     | Control   | Breeding Female | -0.1       | -4.6319  | 5.19 | -0.89231 | 549         | 1.000 |
| Small      | Control   | Helpers | 24         | -          | Small     | Control   | Breeding Female | 0.1        | -7.2986  | 5.19 | -1.40603 | 549         | 1.000 |
| Small      | Control   | Helpers | 24         | -          | Small     | Control   | Breeding Female | 4          | -5.4653  | 5.19 | -1.05285 | 549         | 1.000 |
| Small      | Control   | Helpers | 24         | -          | Small     | Control   | Breeding Male   | -0.1       | -14.4653 | 5.19 | -2.78663 | 549         | 1.000 |
| Small      | Control   | Helpers | 24         | -          | Small     | Control   | Breeding Male   | 0.1        | -21.0486 | 5.19 | -4.05487 | 549         | 0.065 |
| Small      | Control   | Helpers | 24         | -          | Small     | Control   | Breeding Male   | 4          | -14.2986 | 5.19 | -2.75453 | 549         | 1.000 |
| Small      | Control   | Helpers | 24         | -          | Small     | Control   | Helpers         | -0.1       | -0.5625  | 5.19 | -0.10836 | 549         | 1.000 |
| Small      | Control   | Helpers | 24         | -          | Small     | Control   | Helpers         | 0.1        | 1.9306   | 5.19 | 0.37191  | 549         | 1.000 |
| Small      | Control   | Helpers | 24         | -          | Small     | Control   | Helpers         | 4          | -0.3750  | 5.19 | -0.07224 | 549         | 1.000 |
| Small      | Control   | Helpers | 24         | -          | Small     | Treatment | Breeding Female | -0.1       | -4.0589  | 5.20 | -0.78043 | 539         | 1.000 |
| Small      | Control   | Helpers | 24         | -          | Small     | Treatment | Breeding Female | 0.1        | 7.6929   | 5.20 | 1.47945  | 539         | 1.000 |
| Small      | Control   | Helpers | 24         | -          | Small     | Treatment | Breeding Female | 4          | 0.4429   | 5.20 | 0.08517  | 539         | 1.000 |
| Small      | Control   | Helpers | 24         | -          | Small     | Treatment | Breeding Male   | -0.1       | -10.4756 | 5.20 | -2.01419 | 539         | 1.000 |
| Small      | Control   | Helpers | 24         | -          | Small     | Treatment | Breeding Male   | 0.1        | -44.3905 | 5.20 | -8.53694 | 539         | <.001 |
| Small      | Control   | Helpers | 24         | -          | Small     | Treatment | Breeding Male   | 4          | -21.4738 | 5.20 | -4.12973 | 539         | 0.047 |
| Small      | Control   | Helpers | 24         | -          | Small     | Treatment | Helpers         | -0.1       | -1.4547  | 5.20 | -0.27971 | 539         | 1.000 |
| Small      | Control   | Helpers | 24         | -          | Small     | Treatment | Helpers         | 0.1        | 5.4012   | 5.20 | 1.03873  | 539         | 1.000 |
| Small      | Control   | Helpers | 24         | -          | Small     | Treatment | Helpers         | 4          | 1.0887   | 5.20 | 0.20937  | 539         | 1.000 |
| Small      | Control   | Helpers | 4          | -          | Large     | Control   | Breeding Female | -0.1       | -8.7569  | 5.20 | -1.68500 | 536         | 1.000 |
| Small      | Control   | Helpers | 4          | -          | Large     | Control   | Breeding Female | 0.1        | -13.7569 | 5.20 | -2.64709 | 536         | 1.000 |
| Small      | Control   | Helpers | 4          | -          | Large     | Control   | Breeding Male   | -0.1       | -11.8403 | 5.20 | -2.27829 | 536         | 1.000 |
| Small      | Control   | Helpers | 4          | -          | Large     | Control   | Breeding Male   | 0.1        | -13.0069 | 5.20 | -2.50278 | 536         | 1.000 |
| Small      | Control   | Helpers | 4          | -          | Large     | Control   | Helpers         | -0.1       | -1.2358  | 5.20 | -0.23779 | 536         | 1.000 |
| Small      | Control   | Helpers | 4          | -          | Large     | Control   | Helpers         | 0.1        | -0.2516  | 5.20 | -0.04841 | 536         | 1.000 |
| Small      | Control   | Helpers | 4          | -          | Large     | Control   | Helpers         | 4          | -1.4918  | 5.20 | -0.28704 | 536         | 1.000 |
| Small      | Control   | Helpers | 4          | -          | Large     | Treatment | Breeding Female | -0.1       | -12.5826 | 4.86 | -2.58704 | 538         | 1.000 |

Post Hoc Comparisons - Group Size \* Treatment \* Subject \* Time Point

|            |           |                 |            | Comparison |           |           |                 | Difference | SE       | t    | df       | Pbonferroni |       |
|------------|-----------|-----------------|------------|------------|-----------|-----------|-----------------|------------|----------|------|----------|-------------|-------|
| Group Size | Treatment | Subject         | Time Point | Group Size | Treatment | Subject   | Time Point      |            |          |      |          |             |       |
| Small      | Control   | Helpers         | 4          | -          | Large     | Treatment | Breeding Female | 0.1        | -12.3339 | 4.86 | -2.53625 | 538         | 1.000 |
| Small      | Control   | Helpers         | 4          | -          | Large     | Treatment | Breeding Male   | -0.1       | -18.1451 | 4.86 | -3.73072 | 538         | 0.238 |
| Small      | Control   | Helpers         | 4          | -          | Large     | Treatment | Breeding Male   | 0.1        | -21.5839 | 4.86 | -4.43836 | 538         | 0.012 |
| Small      | Control   | Helpers         | 4          | -          | Large     | Treatment | Helpers         | -0.1       | -0.2053  | 4.86 | -0.04221 | 538         | 1.000 |
| Small      | Control   | Helpers         | 4          | -          | Large     | Treatment | Helpers         | 0.1        | 0.2919   | 4.86 | 0.06001  | 538         | 1.000 |
| Small      | Control   | Helpers         | 4          | -          | Small     | Control   | Breeding Female | -0.1       | -4.2569  | 5.19 | -0.82007 | 549         | 1.000 |
| Small      | Control   | Helpers         | 4          | -          | Small     | Control   | Breeding Female | 0.1        | -6.9236  | 5.19 | -1.33379 | 549         | 1.000 |
| Small      | Control   | Helpers         | 4          | -          | Small     | Control   | Breeding Male   | -0.1       | -14.0903 | 5.19 | -2.71439 | 549         | 1.000 |
| Small      | Control   | Helpers         | 4          | -          | Small     | Control   | Breeding Male   | 0.1        | -20.6736 | 5.19 | -3.98263 | 549         | 0.087 |
| Small      | Control   | Helpers         | 4          | -          | Small     | Control   | Helpers         | -0.1       | -0.1875  | 5.19 | -0.03612 | 549         | 1.000 |
| Small      | Control   | Helpers         | 4          | -          | Small     | Control   | Helpers         | 0.1        | 2.3056   | 5.19 | 0.44415  | 549         | 1.000 |
| Small      | Control   | Helpers         | 4          | -          | Small     | Treatment | Breeding Female | -0.1       | -3.6839  | 5.20 | -0.70832 | 539         | 1.000 |
| Small      | Control   | Helpers         | 4          | -          | Small     | Treatment | Breeding Female | 0.1        | 8.0679   | 5.20 | 1.55157  | 539         | 1.000 |
| Small      | Control   | Helpers         | 4          | -          | Small     | Treatment | Breeding Male   | -0.1       | -10.1006 | 5.20 | -1.94208 | 539         | 1.000 |
| Small      | Control   | Helpers         | 4          | -          | Small     | Treatment | Breeding Male   | 0.1        | -44.0155 | 5.20 | -8.46482 | 539         | <.001 |
| Small      | Control   | Helpers         | 4          | -          | Small     | Treatment | Helpers         | -0.1       | -1.0797  | 5.20 | -0.20761 | 539         | 1.000 |
| Small      | Control   | Helpers         | 4          | -          | Small     | Treatment | Helpers         | 0.1        | 5.7762   | 5.20 | 1.11085  | 539         | 1.000 |
| Small      | Treatment | Breeding Female | -0.1       | -          | Large     | Control   | Breeding Female | -0.1       | -5.0730  | 5.20 | -0.97542 | 539         | 1.000 |
| Small      | Treatment | Breeding Female | -0.1       | -          | Large     | Control   | Breeding Male   | -0.1       | -8.1564  | 5.20 | -1.56826 | 539         | 1.000 |
| Small      | Treatment | Breeding Female | -0.1       | -          | Large     | Control   | Helpers         | -0.1       | 2.4481   | 5.20 | 0.47071  | 539         | 1.000 |
| Small      | Treatment | Breeding Female | -0.1       | -          | Large     | Treatment | Breeding Female | -0.1       | -8.8986  | 4.87 | -1.82570 | 543         | 1.000 |
| Small      | Treatment | Breeding Female | -0.1       | -          | Large     | Treatment | Breeding Male   | -0.1       | -14.4611 | 4.87 | -2.96694 | 543         | 1.000 |
| Small      | Treatment | Breeding Female | -0.1       | -          | Large     | Treatment | Helpers         | -0.1       | 3.4786   | 4.87 | 0.71369  | 543         | 1.000 |
| Small      | Treatment | Breeding Female | -0.1       | -          | Small     | Control   | Breeding Female | -0.1       | -0.5730  | 5.20 | -0.11018 | 539         | 1.000 |
| Small      | Treatment | Breeding Female | -0.1       | -          | Small     | Control   | Breeding Male   | -0.1       | -10.4064 | 5.20 | -2.00088 | 539         | 1.000 |
| Small      | Treatment | Breeding Female | -0.1       | -          | Small     | Control   | Helpers         | -0.1       | 3.4964   | 5.20 | 0.67227  | 539         | 1.000 |
| Small      | Treatment | Breeding Female | -0.1       | -          | Small     | Treatment | Breeding Male   | -0.1       | -6.4167  | 5.19 | -1.23613 | 549         | 1.000 |
| Small      | Treatment | Breeding Female | -0.1       | -          | Small     | Treatment | Helpers         | -0.1       | 2.6042   | 5.19 | 0.50167  | 549         | 1.000 |
| Small      | Treatment | Breeding Female | 0.1        | -          | Large     | Control   | Breeding Female | -0.1       | -16.8248 | 5.20 | -3.23566 | 539         | 1.000 |
| Small      | Treatment | Breeding Female | 0.1        | -          | Large     | Control   | Breeding Female | 0.1        | -21.8248 | 5.20 | -4.19724 | 539         | 0.036 |
| Small      | Treatment | Breeding Female | 0.1        | -          | Large     | Control   | Breeding Male   | -0.1       | -19.9082 | 5.20 | -3.82863 | 539         | 0.162 |
| Small      | Treatment | Breeding Female | 0.1        | -          | Large     | Control   | Breeding Male   | 0.1        | -21.0748 | 5.20 | -4.05300 | 539         | 0.065 |
| Small      | Treatment | Breeding Female | 0.1        | -          | Large     | Control   | Helpers         | -0.1       | -9.3037  | 5.20 | -1.78924 | 539         | 1.000 |
| Small      | Treatment | Breeding Female | 0.1        | -          | Large     | Control   | Helpers         | 0.1        | -8.3195  | 5.20 | -1.59996 | 539         | 1.000 |
| Small      | Treatment | Breeding Female | 0.1        | -          | Large     | Treatment | Breeding Female | -0.1       | -20.6504 | 4.87 | -4.24048 | 544         | 0.030 |
| Small      | Treatment | Breeding Female | 0.1        | -          | Large     | Treatment | Breeding Female | 0.1        | -20.4018 | 4.87 | -4.18881 | 543         | 0.037 |
| Small      | Treatment | Breeding Female | 0.1        | -          | Large     | Treatment | Breeding Male   | -0.1       | -26.2129 | 4.87 | -5.38272 | 544         | <.001 |



Post Hoc Comparisons - Group Size \* Treatment \* Subject \* Time Point

| Comparison |           |                 |            |            |           |                 |            |            |      |           |     |             |
|------------|-----------|-----------------|------------|------------|-----------|-----------------|------------|------------|------|-----------|-----|-------------|
| Group Size | Treatment | Subject         | Time Point | Group Size | Treatment | Subject         | Time Point | Difference | SE   | t         | df  | Pbonferroni |
| Small      | Treatment | Breeding Female | 0.1        | - Large    | Treatment | Breeding Male   | 0.1        | -29.6518   | 4.87 | -6.08798  | 543 | <.001       |
| Small      | Treatment | Breeding Female | 0.1        | - Large    | Treatment | Helpers         | -0.1       | -8.2732    | 4.87 | -1.69887  | 544 | 1.000       |
| Small      | Treatment | Breeding Female | 0.1        | - Large    | Treatment | Helpers         | 0.1        | -7.7760    | 4.87 | -1.59654  | 543 | 1.000       |
| Small      | Treatment | Breeding Female | 0.1        | - Small    | Control   | Breeding Female | -0.1       | -12.3248   | 5.20 | -2.37024  | 539 | 1.000       |
| Small      | Treatment | Breeding Female | 0.1        | - Small    | Control   | Breeding Female | 0.1        | -14.9915   | 5.20 | -2.88308  | 539 | 1.000       |
| Small      | Treatment | Breeding Female | 0.1        | - Small    | Control   | Breeding Male   | -0.1       | -22.1582   | 5.20 | -4.26134  | 539 | 0.027       |
| Small      | Treatment | Breeding Female | 0.1        | - Small    | Control   | Breeding Male   | 0.1        | -28.7415   | 5.20 | -5.52741  | 539 | <.001       |
| Small      | Treatment | Breeding Female | 0.1        | - Small    | Control   | Helpers         | -0.1       | -8.2554    | 5.20 | -1.58763  | 539 | 1.000       |
| Small      | Treatment | Breeding Female | 0.1        | - Small    | Control   | Helpers         | 0.1        | -5.7623    | 5.20 | -1.10818  | 539 | 1.000       |
| Small      | Treatment | Breeding Female | 0.1        | - Small    | Treatment | Breeding Female | -0.1       | -11.7518   | 5.19 | -2.26268  | 551 | 1.000       |
| Small      | Treatment | Breeding Female | 0.1        | - Small    | Treatment | Breeding Male   | -0.1       | -18.1685   | 5.19 | -3.49814  | 551 | 0.571       |
| Small      | Treatment | Breeding Female | 0.1        | - Small    | Treatment | Breeding Male   | 0.1        | -52.0833   | 5.19 | -10.03349 | 549 | <.001       |
| Small      | Treatment | Breeding Female | 0.1        | - Small    | Treatment | Helpers         | -0.1       | -9.1476    | 5.19 | -1.76128  | 551 | 1.000       |
| Small      | Treatment | Breeding Female | 0.1        | - Small    | Treatment | Helpers         | 0.1        | -2.2917    | 5.19 | -0.44147  | 549 | 1.000       |
| Small      | Treatment | Breeding Female | 24         | - Large    | Control   | Breeding Female | -0.1       | -7.9082    | 5.20 | -1.52085  | 539 | 1.000       |
| Small      | Treatment | Breeding Female | 24         | - Large    | Control   | Breeding Female | 0.1        | -12.9082   | 5.20 | -2.48243  | 539 | 1.000       |
| Small      | Treatment | Breeding Female | 24         | - Large    | Control   | Breeding Female | 24         | -9.9915    | 5.20 | -1.92151  | 539 | 1.000       |
| Small      | Treatment | Breeding Female | 24         | - Large    | Control   | Breeding Female | 4          | -9.1582    | 5.20 | -1.76125  | 539 | 1.000       |
| Small      | Treatment | Breeding Female | 24         | - Large    | Control   | Breeding Male   | -0.1       | -10.9915   | 5.20 | -2.11383  | 539 | 1.000       |
| Small      | Treatment | Breeding Female | 24         | - Large    | Control   | Breeding Male   | 0.1        | -12.1582   | 5.20 | -2.33819  | 539 | 1.000       |
| Small      | Treatment | Breeding Female | 24         | - Large    | Control   | Breeding Male   | 24         | -8.4082    | 5.20 | -1.61701  | 539 | 1.000       |
| Small      | Treatment | Breeding Female | 24         | - Large    | Control   | Breeding Male   | 4          | -8.4915    | 5.20 | -1.63304  | 539 | 1.000       |
| Small      | Treatment | Breeding Female | 24         | - Large    | Control   | Helpers         | -0.1       | -0.3870    | 5.20 | -0.07443  | 539 | 1.000       |
| Small      | Treatment | Breeding Female | 24         | - Large    | Control   | Helpers         | 0.1        | 0.5972     | 5.20 | 0.11485   | 539 | 1.000       |
| Small      | Treatment | Breeding Female | 24         | - Large    | Control   | Helpers         | 24         | -0.5635    | 5.20 | -0.10837  | 539 | 1.000       |
| Small      | Treatment | Breeding Female | 24         | - Large    | Control   | Helpers         | 4          | -0.6430    | 5.20 | -0.12365  | 539 | 1.000       |
| Small      | Treatment | Breeding Female | 24         | - Large    | Treatment | Breeding Female | -0.1       | -11.7338   | 4.87 | -2.40948  | 544 | 1.000       |
| Small      | Treatment | Breeding Female | 24         | - Large    | Treatment | Breeding Female | 0.1        | -11.4851   | 4.87 | -2.35808  | 543 | 1.000       |
| Small      | Treatment | Breeding Female | 24         | - Large    | Treatment | Breeding Female | 24         | -8.7351    | 4.87 | -1.79346  | 543 | 1.000       |
| Small      | Treatment | Breeding Female | 24         | - Large    | Treatment | Breeding Female | 4          | 4.3274     | 4.87 | 0.88849   | 543 | 1.000       |
| Small      | Treatment | Breeding Female | 24         | - Large    | Treatment | Breeding Male   | -0.1       | -17.2963   | 4.87 | -3.55172  | 544 | 0.469       |
| Small      | Treatment | Breeding Female | 24         | - Large    | Treatment | Breeding Male   | 0.1        | -20.7351   | 4.87 | -4.25725  | 543 | 0.028       |
| Small      | Treatment | Breeding Female | 24         | - Large    | Treatment | Breeding Male   | 24         | -36.7976   | 4.87 | -7.55514  | 543 | <.001       |
| Small      | Treatment | Breeding Female | 24         | - Large    | Treatment | Breeding Male   | 4          | -40.9851   | 4.87 | -8.41490  | 543 | <.001       |

Post Hoc Comparisons - Group Size \* Treatment \* Subject \* Time Point

|            |           |                 |            | Comparison |           |           |                 | Difference | SE       | t    | df       | Pbonferroni |       |
|------------|-----------|-----------------|------------|------------|-----------|-----------|-----------------|------------|----------|------|----------|-------------|-------|
| Group Size | Treatment | Subject         | Time Point | Group Size | Treatment | Subject   | Time Point      |            |          |      |          |             |       |
| Small      | Treatment | Breeding Female | 24         | -          | Large     | Treatment | Helpers         | -0.1       | 0.6435   | 4.87 | 0.13213  | 544         | 1.000 |
| Small      | Treatment | Breeding Female | 24         | -          | Large     | Treatment | Helpers         | 0.1        | 1.1406   | 4.87 | 0.23419  | 543         | 1.000 |
| Small      | Treatment | Breeding Female | 24         | -          | Large     | Treatment | Helpers         | 24         | 2.7363   | 4.87 | 0.56180  | 543         | 1.000 |
| Small      | Treatment | Breeding Female | 24         | -          | Large     | Treatment | Helpers         | 4          | 1.6518   | 4.87 | 0.33914  | 543         | 1.000 |
| Small      | Treatment | Breeding Female | 24         | -          | Small     | Control   | Breeding Female | -0.1       | -3.4082  | 5.20 | -0.65544 | 539         | 1.000 |
| Small      | Treatment | Breeding Female | 24         | -          | Small     | Control   | Breeding Female | 0.1        | -6.0748  | 5.20 | -1.16828 | 539         | 1.000 |
| Small      | Treatment | Breeding Female | 24         | -          | Small     | Control   | Breeding Female | 24         | -4.1582  | 5.20 | -0.79967 | 539         | 1.000 |
| Small      | Treatment | Breeding Female | 24         | -          | Small     | Control   | Breeding Female | 4          | -4.2415  | 5.20 | -0.81570 | 539         | 1.000 |
| Small      | Treatment | Breeding Female | 24         | -          | Small     | Control   | Breeding Male   | -0.1       | -13.2415 | 5.20 | -2.54653 | 539         | 1.000 |
| Small      | Treatment | Breeding Female | 24         | -          | Small     | Control   | Breeding Male   | 0.1        | -19.8248 | 5.20 | -3.81261 | 539         | 0.173 |
| Small      | Treatment | Breeding Female | 24         | -          | Small     | Control   | Breeding Male   | 24         | -14.5748 | 5.20 | -2.80295 | 539         | 1.000 |
| Small      | Treatment | Breeding Female | 24         | -          | Small     | Control   | Breeding Male   | 4          | -13.0748 | 5.20 | -2.51448 | 539         | 1.000 |
| Small      | Treatment | Breeding Female | 24         | -          | Small     | Control   | Helpers         | -0.1       | 0.6613   | 5.20 | 0.12718  | 539         | 1.000 |
| Small      | Treatment | Breeding Female | 24         | -          | Small     | Control   | Helpers         | 0.1        | 3.1543   | 5.20 | 0.60663  | 539         | 1.000 |
| Small      | Treatment | Breeding Female | 24         | -          | Small     | Control   | Helpers         | 24         | 1.2238   | 5.20 | 0.23535  | 539         | 1.000 |
| Small      | Treatment | Breeding Female | 24         | -          | Small     | Control   | Helpers         | 4          | 0.8488   | 5.20 | 0.16324  | 539         | 1.000 |
| Small      | Treatment | Breeding Female | 24         | -          | Small     | Treatment | Breeding Female | -0.1       | -2.8351  | 5.19 | -0.54587 | 551         | 1.000 |
| Small      | Treatment | Breeding Female | 24         | -          | Small     | Treatment | Breeding Female | 0.1        | 8.9167   | 5.19 | 1.71773  | 549         | 1.000 |
| Small      | Treatment | Breeding Female | 24         | -          | Small     | Treatment | Breeding Female | 4          | 1.6667   | 5.19 | 0.32107  | 549         | 1.000 |
| Small      | Treatment | Breeding Female | 24         | -          | Small     | Treatment | Breeding Male   | -0.1       | -9.2518  | 5.19 | -1.78133 | 551         | 1.000 |
| Small      | Treatment | Breeding Female | 24         | -          | Small     | Treatment | Breeding Male   | 0.1        | -43.1667 | 5.19 | -8.31576 | 549         | <.001 |
| Small      | Treatment | Breeding Female | 24         | -          | Small     | Treatment | Breeding Male   | 24         | -22.4167 | 5.19 | -4.31841 | 549         | 0.021 |
| Small      | Treatment | Breeding Female | 24         | -          | Small     | Treatment | Breeding Male   | 4          | -20.2500 | 5.19 | -3.90102 | 549         | 0.121 |
| Small      | Treatment | Breeding Female | 24         | -          | Small     | Treatment | Helpers         | -0.1       | -0.2310  | 5.19 | -0.04447 | 551         | 1.000 |
| Small      | Treatment | Breeding Female | 24         | -          | Small     | Treatment | Helpers         | 0.1        | 6.6250   | 5.19 | 1.27626  | 549         | 1.000 |
| Small      | Treatment | Breeding Female | 24         | -          | Small     | Treatment | Helpers         | 24         | 4.0000   | 5.19 | 0.77057  | 549         | 1.000 |
| Small      | Treatment | Breeding Female | 24         | -          | Small     | Treatment | Helpers         | 4          | 2.3125   | 5.19 | 0.44549  | 549         | 1.000 |
| Small      | Treatment | Breeding Female | 4          | -          | Large     | Control   | Breeding Female | -0.1       | -9.5748  | 5.20 | -1.84138 | 539         | 1.000 |
| Small      | Treatment | Breeding Female | 4          | -          | Large     | Control   | Breeding Female | 0.1        | -14.5748 | 5.20 | -2.80295 | 539         | 1.000 |
| Small      | Treatment | Breeding Female | 4          | -          | Large     | Control   | Breeding Female | 4          | -10.8248 | 5.20 | -2.08177 | 539         | 1.000 |
| Small      | Treatment | Breeding Female | 4          | -          | Large     | Control   | Breeding Male   | -0.1       | -12.6582 | 5.20 | -2.43435 | 539         | 1.000 |
| Small      | Treatment | Breeding Female | 4          | -          | Large     | Control   | Breeding Male   | 0.1        | -13.8248 | 5.20 | -2.65872 | 539         | 1.000 |
| Small      | Treatment | Breeding Female | 4          | -          | Large     | Control   | Breeding Male   | 4          | -10.1582 | 5.20 | -1.95356 | 539         | 1.000 |
| Small      | Treatment | Breeding Female | 4          | -          | Large     | Control   | Helpers         | -0.1       | -2.0537  | 5.20 | -0.39495 | 539         | 1.000 |

Post Hoc Comparisons - Group Size \* Treatment \* Subject \* Time Point

| Comparison |           |                 |            |            |           |                 |            |            |      |          |     |             |
|------------|-----------|-----------------|------------|------------|-----------|-----------------|------------|------------|------|----------|-----|-------------|
| Group Size | Treatment | Subject         | Time Point | Group Size | Treatment | Subject         | Time Point | Difference | SE   | t        | df  | Pbonferroni |
| Small      | Treatment | Breeding Female | 4          | - Large    | Control   | Helpers         | 0.1        | -1.0695    | 5.20 | -0.20567 | 539 | 1.000       |
| Small      | Treatment | Breeding Female | 4          | - Large    | Control   | Helpers         | 4          | -2.3096    | 5.20 | -0.44418 | 539 | 1.000       |
| Small      | Treatment | Breeding Female | 4          | - Large    | Treatment | Breeding Female | -0.1       | -13.4004   | 4.87 | -2.75172 | 544 | 1.000       |
| Small      | Treatment | Breeding Female | 4          | - Large    | Treatment | Breeding Female | 0.1        | -13.1518   | 4.87 | -2.70027 | 543 | 1.000       |
| Small      | Treatment | Breeding Female | 4          | - Large    | Treatment | Breeding Female | 4          | 2.6607     | 4.87 | 0.54629  | 543 | 1.000       |
| Small      | Treatment | Breeding Female | 4          | - Large    | Treatment | Breeding Male   | -0.1       | -18.9629   | 4.87 | -3.89396 | 544 | 0.125       |
| Small      | Treatment | Breeding Female | 4          | - Large    | Treatment | Breeding Male   | 0.1        | -22.4018   | 4.87 | -4.59944 | 543 | 0.006       |
| Small      | Treatment | Breeding Female | 4          | - Large    | Treatment | Breeding Male   | 4          | -42.6518   | 4.87 | -8.75709 | 543 | <.001       |
| Small      | Treatment | Breeding Female | 4          | - Large    | Treatment | Helpers         | -0.1       | -1.0232    | 4.87 | -0.21011 | 544 | 1.000       |
| Small      | Treatment | Breeding Female | 4          | - Large    | Treatment | Helpers         | 0.1        | -0.5260    | 4.87 | -0.10800 | 543 | 1.000       |
| Small      | Treatment | Breeding Female | 4          | - Large    | Treatment | Helpers         | 4          | -0.0149    | 4.87 | -0.00305 | 543 | 1.000       |
| Small      | Treatment | Breeding Female | 4          | - Small    | Control   | Breeding Female | -0.1       | -5.0748    | 5.20 | -0.97596 | 539 | 1.000       |
| Small      | Treatment | Breeding Female | 4          | - Small    | Control   | Breeding Female | 0.1        | -7.7415    | 5.20 | -1.48880 | 539 | 1.000       |
| Small      | Treatment | Breeding Female | 4          | - Small    | Control   | Breeding Female | 4          | -5.9082    | 5.20 | -1.13622 | 539 | 1.000       |
| Small      | Treatment | Breeding Female | 4          | - Small    | Control   | Breeding Male   | -0.1       | -14.9082   | 5.20 | -2.86706 | 539 | 1.000       |
| Small      | Treatment | Breeding Female | 4          | - Small    | Control   | Breeding Male   | 0.1        | -21.4915   | 5.20 | -4.13313 | 539 | 0.047       |
| Small      | Treatment | Breeding Female | 4          | - Small    | Control   | Breeding Male   | 4          | -14.7415   | 5.20 | -2.83501 | 539 | 1.000       |
| Small      | Treatment | Breeding Female | 4          | - Small    | Control   | Helpers         | -0.1       | -1.0054    | 5.20 | -0.19335 | 539 | 1.000       |
| Small      | Treatment | Breeding Female | 4          | - Small    | Control   | Helpers         | 0.1        | 1.4877     | 5.20 | 0.28610  | 539 | 1.000       |
| Small      | Treatment | Breeding Female | 4          | - Small    | Control   | Helpers         | 4          | -0.8179    | 5.20 | -0.15729 | 539 | 1.000       |
| Small      | Treatment | Breeding Female | 4          | - Small    | Treatment | Breeding Female | -0.1       | -4.5018    | 5.19 | -0.86677 | 551 | 1.000       |
| Small      | Treatment | Breeding Female | 4          | - Small    | Treatment | Breeding Female | 0.1        | 7.2500     | 5.19 | 1.39666  | 549 | 1.000       |
| Small      | Treatment | Breeding Female | 4          | - Small    | Treatment | Breeding Male   | -0.1       | -10.9185   | 5.19 | -2.10223 | 551 | 1.000       |
| Small      | Treatment | Breeding Female | 4          | - Small    | Treatment | Breeding Male   | 0.1        | -44.8333   | 5.19 | -8.63683 | 549 | <.001       |
| Small      | Treatment | Breeding Female | 4          | - Small    | Treatment | Breeding Male   | 4          | -21.9167   | 5.19 | -4.22209 | 549 | 0.032       |
| Small      | Treatment | Breeding Female | 4          | - Small    | Treatment | Helpers         | -0.1       | -1.8976    | 5.19 | -0.36537 | 551 | 1.000       |
| Small      | Treatment | Breeding Female | 4          | - Small    | Treatment | Helpers         | 0.1        | 4.9583     | 5.19 | 0.95519  | 549 | 1.000       |
| Small      | Treatment | Breeding Female | 4          | - Small    | Treatment | Helpers         | 4          | 0.6458     | 5.19 | 0.12442  | 549 | 1.000       |
| Small      | Treatment | Breeding Male   | -0.1       | - Large    | Control   | Breeding Male   | -0.1       | -1.7397    | 5.20 | -0.33450 | 539 | 1.000       |
| Small      | Treatment | Breeding Male   | -0.1       | - Large    | Control   | Helpers         | -0.1       | 8.8648     | 5.20 | 1.70447  | 539 | 1.000       |
| Small      | Treatment | Breeding Male   | -0.1       | - Large    | Treatment | Breeding Male   | -0.1       | -8.0445    | 4.87 | -1.65045 | 543 | 1.000       |
| Small      | Treatment | Breeding Male   | -0.1       | - Large    | Treatment | Helpers         | -0.1       | 9.8953     | 4.87 | 2.03017  | 543 | 1.000       |
| Small      | Treatment | Breeding Male   | -0.1       | - Small    | Control   | Breeding Male   | -0.1       | -3.9897    | 5.20 | -0.76712 | 539 | 1.000       |
| Small      | Treatment | Breeding Male   | -0.1       | - Small    | Control   | Helpers         | -0.1       | 9.9131     | 5.20 | 1.90603  | 539 | 1.000       |

Post Hoc Comparisons - Group Size \* Treatment \* Subject \* Time Point

|            |           | Comparison    |            |            |           |           |                 |      | Difference | SE   | t       | df  | Pbonferroni |
|------------|-----------|---------------|------------|------------|-----------|-----------|-----------------|------|------------|------|---------|-----|-------------|
| Group Size | Treatment | Subject       | Time Point | Group Size | Treatment | Subject   | Time Point      |      |            |      |         |     |             |
| Small      | Treatment | Breeding Male | -0.1       | -          | Small     | Treatment | Helpers         | -0.1 | 9.0208     | 5.19 | 1.73780 | 549 | 1.000       |
| Small      | Treatment | Breeding Male | 0.1        | -          | Large     | Control   | Breeding Female | -0.1 | 35.2585    | 5.20 | 6.78073 | 539 | <.001       |
| Small      | Treatment | Breeding Male | 0.1        | -          | Large     | Control   | Breeding Male   | -0.1 | 32.1752    | 5.20 | 6.18776 | 539 | <.001       |
| Small      | Treatment | Breeding Male | 0.1        | -          | Large     | Control   | Breeding Male   | 0.1  | 31.0085    | 5.20 | 5.96340 | 539 | <.001       |
| Small      | Treatment | Breeding Male | 0.1        | -          | Large     | Control   | Helpers         | -0.1 | 42.7796    | 5.20 | 8.22716 | 539 | <.001       |
| Small      | Treatment | Breeding Male | 0.1        | -          | Large     | Control   | Helpers         | 0.1  | 43.7639    | 5.20 | 8.41644 | 539 | <.001       |
| Small      | Treatment | Breeding Male | 0.1        | -          | Large     | Treatment | Breeding Female | -0.1 | 31.4329    | 4.87 | 6.45462 | 544 | <.001       |
| Small      | Treatment | Breeding Male | 0.1        | -          | Large     | Treatment | Breeding Male   | -0.1 | 25.8704    | 4.87 | 5.31238 | 544 | <.001       |
| Small      | Treatment | Breeding Male | 0.1        | -          | Large     | Treatment | Breeding Male   | 0.1  | 22.4316    | 4.87 | 4.60556 | 543 | 0.006       |
| Small      | Treatment | Breeding Male | 0.1        | -          | Large     | Treatment | Helpers         | -0.1 | 43.8101    | 4.87 | 8.99624 | 544 | <.001       |
| Small      | Treatment | Breeding Male | 0.1        | -          | Large     | Treatment | Helpers         | 0.1  | 44.3073    | 4.87 | 9.09700 | 543 | <.001       |
| Small      | Treatment | Breeding Male | 0.1        | -          | Small     | Control   | Breeding Female | -0.1 | 39.7585    | 5.20 | 7.64615 | 539 | <.001       |
| Small      | Treatment | Breeding Male | 0.1        | -          | Small     | Control   | Breeding Male   | -0.1 | 29.9252    | 5.20 | 5.75506 | 539 | <.001       |
| Small      | Treatment | Breeding Male | 0.1        | -          | Small     | Control   | Breeding Male   | 0.1  | 23.3418    | 5.20 | 4.48898 | 539 | 0.010       |
| Small      | Treatment | Breeding Male | 0.1        | -          | Small     | Control   | Helpers         | -0.1 | 43.8280    | 5.20 | 8.42877 | 539 | <.001       |
| Small      | Treatment | Breeding Male | 0.1        | -          | Small     | Control   | Helpers         | 0.1  | 46.3210    | 5.20 | 8.90822 | 539 | <.001       |
| Small      | Treatment | Breeding Male | 0.1        | -          | Small     | Treatment | Breeding Female | -0.1 | 40.3315    | 5.19 | 7.76541 | 551 | <.001       |
| Small      | Treatment | Breeding Male | 0.1        | -          | Small     | Treatment | Breeding Male   | -0.1 | 33.9149    | 5.19 | 6.52995 | 551 | <.001       |
| Small      | Treatment | Breeding Male | 0.1        | -          | Small     | Treatment | Helpers         | -0.1 | 42.9357    | 5.19 | 8.26681 | 551 | <.001       |
| Small      | Treatment | Breeding Male | 0.1        | -          | Small     | Treatment | Helpers         | 0.1  | 49.7917    | 5.19 | 9.59202 | 549 | <.001       |
| Small      | Treatment | Breeding Male | 24         | -          | Large     | Control   | Breeding Female | -0.1 | 14.5085    | 5.20 | 2.79020 | 539 | 1.000       |
| Small      | Treatment | Breeding Male | 24         | -          | Large     | Control   | Breeding Female | 0.1  | 9.5085     | 5.20 | 1.82863 | 539 | 1.000       |
| Small      | Treatment | Breeding Male | 24         | -          | Large     | Control   | Breeding Female | 4    | 13.2585    | 5.20 | 2.54981 | 539 | 1.000       |
| Small      | Treatment | Breeding Male | 24         | -          | Large     | Control   | Breeding Male   | -0.1 | 11.4252    | 5.20 | 2.19723 | 539 | 1.000       |
| Small      | Treatment | Breeding Male | 24         | -          | Large     | Control   | Breeding Male   | 0.1  | 10.2585    | 5.20 | 1.97286 | 539 | 1.000       |
| Small      | Treatment | Breeding Male | 24         | -          | Large     | Control   | Breeding Male   | 24   | 14.0085    | 5.20 | 2.69404 | 539 | 1.000       |
| Small      | Treatment | Breeding Male | 24         | -          | Large     | Control   | Breeding Male   | 4    | 13.9252    | 5.20 | 2.67802 | 539 | 1.000       |
| Small      | Treatment | Breeding Male | 24         | -          | Large     | Control   | Helpers         | -0.1 | 22.0296    | 5.20 | 4.23663 | 539 | 0.030       |
| Small      | Treatment | Breeding Male | 24         | -          | Large     | Control   | Helpers         | 0.1  | 23.0139    | 5.20 | 4.42591 | 539 | 0.013       |
| Small      | Treatment | Breeding Male | 24         | -          | Large     | Control   | Helpers         | 24   | 21.8532    | 5.20 | 4.20269 | 539 | 0.035       |
| Small      | Treatment | Breeding Male | 24         | -          | Large     | Control   | Helpers         | 4    | 21.7737    | 5.20 | 4.18740 | 539 | 0.037       |
| Small      | Treatment | Breeding Male | 24         | -          | Large     | Treatment | Breeding Female | -0.1 | 10.6829    | 4.87 | 2.19369 | 544 | 1.000       |
| Small      | Treatment | Breeding Male | 24         | -          | Large     | Treatment | Breeding Female | 0.1  | 10.9316    | 4.87 | 2.24443 | 543 | 1.000       |
| Small      | Treatment | Breeding Male | 24         | -          | Large     | Treatment | Breeding Female | 4    | 26.7441    | 4.87 | 5.49099 | 543 | <.001       |

Post Hoc Comparisons - Group Size \* Treatment \* Subject \* Time Point

| Comparison |           |               |            |            |           |           |                 |            |          |      |          |             |       |
|------------|-----------|---------------|------------|------------|-----------|-----------|-----------------|------------|----------|------|----------|-------------|-------|
| Group Size | Treatment | Subject       | Time Point | Group Size | Treatment | Subject   | Time Point      | Difference | SE       | t    | df       | Pbonferroni |       |
| Small      | Treatment | Breeding Male | 24         | -          | Large     | Treatment | Breeding Male   | -0.1       | 5.1204   | 4.87 | 1.05146  | 544         | 1.000 |
| Small      | Treatment | Breeding Male | 24         | -          | Large     | Treatment | Breeding Male   | 0.1        | 1.6816   | 4.87 | 0.34525  | 543         | 1.000 |
| Small      | Treatment | Breeding Male | 24         | -          | Large     | Treatment | Breeding Male   | 24         | -14.3809 | 4.87 | -2.95264 | 543         | 1.000 |
| Small      | Treatment | Breeding Male | 24         | -          | Large     | Treatment | Breeding Male   | 4          | -18.5684 | 4.87 | -3.81240 | 543         | 0.173 |
| Small      | Treatment | Breeding Male | 24         | -          | Large     | Treatment | Helpers         | -0.1       | 23.0601  | 4.87 | 4.73531  | 544         | 0.003 |
| Small      | Treatment | Breeding Male | 24         | -          | Large     | Treatment | Helpers         | 0.1        | 23.5573  | 4.87 | 4.83670  | 543         | 0.002 |
| Small      | Treatment | Breeding Male | 24         | -          | Large     | Treatment | Helpers         | 24         | 25.1529  | 4.87 | 5.16430  | 543         | <.001 |
| Small      | Treatment | Breeding Male | 24         | -          | Large     | Treatment | Helpers         | 4          | 24.0685  | 4.87 | 4.94164  | 543         | 0.001 |
| Small      | Treatment | Breeding Male | 24         | -          | Small     | Control   | Breeding Female | -0.1       | 19.0085  | 5.20 | 3.65562  | 539         | 0.318 |
| Small      | Treatment | Breeding Male | 24         | -          | Small     | Control   | Breeding Female | 0.1        | 16.3418  | 5.20 | 3.14278  | 539         | 1.000 |
| Small      | Treatment | Breeding Male | 24         | -          | Small     | Control   | Breeding Female | 4          | 18.1752  | 5.20 | 3.49536  | 539         | 0.578 |
| Small      | Treatment | Breeding Male | 24         | -          | Small     | Control   | Breeding Male   | -0.1       | 9.1752   | 5.20 | 1.76452  | 539         | 1.000 |
| Small      | Treatment | Breeding Male | 24         | -          | Small     | Control   | Breeding Male   | 0.1        | 2.5918   | 5.20 | 0.49845  | 539         | 1.000 |
| Small      | Treatment | Breeding Male | 24         | -          | Small     | Control   | Breeding Male   | 24         | 7.8418   | 5.20 | 1.50810  | 539         | 1.000 |
| Small      | Treatment | Breeding Male | 24         | -          | Small     | Control   | Breeding Male   | 4          | 9.3418   | 5.20 | 1.79658  | 539         | 1.000 |
| Small      | Treatment | Breeding Male | 24         | -          | Small     | Control   | Helpers         | -0.1       | 23.0780  | 5.20 | 4.43823  | 539         | 0.012 |
| Small      | Treatment | Breeding Male | 24         | -          | Small     | Control   | Helpers         | 0.1        | 25.5710  | 5.20 | 4.91768  | 539         | 0.001 |
| Small      | Treatment | Breeding Male | 24         | -          | Small     | Control   | Helpers         | 24         | 23.6405  | 5.20 | 4.54641  | 539         | 0.008 |
| Small      | Treatment | Breeding Male | 24         | -          | Small     | Control   | Helpers         | 4          | 23.2655  | 5.20 | 4.47429  | 539         | 0.011 |
| Small      | Treatment | Breeding Male | 24         | -          | Small     | Treatment | Breeding Female | -0.1       | 19.5815  | 5.19 | 3.77022  | 551         | 0.204 |
| Small      | Treatment | Breeding Male | 24         | -          | Small     | Treatment | Breeding Female | 0.1        | 31.3333  | 5.19 | 6.03615  | 549         | <.001 |
| Small      | Treatment | Breeding Male | 24         | -          | Small     | Treatment | Breeding Female | 4          | 24.0833  | 5.19 | 4.63949  | 549         | 0.005 |
| Small      | Treatment | Breeding Male | 24         | -          | Small     | Treatment | Breeding Male   | -0.1       | 13.1649  | 5.19 | 2.53476  | 551         | 1.000 |
| Small      | Treatment | Breeding Male | 24         | -          | Small     | Treatment | Breeding Male   | 0.1        | -20.7500 | 5.19 | -3.99734 | 549         | 0.082 |
| Small      | Treatment | Breeding Male | 24         | -          | Small     | Treatment | Breeding Male   | 4          | 2.1667   | 5.19 | 0.41739  | 549         | 1.000 |
| Small      | Treatment | Breeding Male | 24         | -          | Small     | Treatment | Helpers         | -0.1       | 22.1857  | 5.19 | 4.27162  | 551         | 0.026 |
| Small      | Treatment | Breeding Male | 24         | -          | Small     | Treatment | Helpers         | 0.1        | 29.0417  | 5.19 | 5.59467  | 549         | <.001 |
| Small      | Treatment | Breeding Male | 24         | -          | Small     | Treatment | Helpers         | 24         | 26.4167  | 5.19 | 5.08899  | 549         | <.001 |
| Small      | Treatment | Breeding Male | 24         | -          | Small     | Treatment | Helpers         | 4          | 24.7292  | 5.19 | 4.76390  | 549         | 0.003 |
| Small      | Treatment | Breeding Male | 4          | -          | Large     | Control   | Breeding Female | -0.1       | 12.3418  | 5.20 | 2.37352  | 539         | 1.000 |
| Small      | Treatment | Breeding Male | 4          | -          | Large     | Control   | Breeding Female | 0.1        | 7.3418   | 5.20 | 1.41195  | 539         | 1.000 |
| Small      | Treatment | Breeding Male | 4          | -          | Large     | Control   | Breeding Male   | -0.1       | 9.2585   | 5.20 | 1.78055  | 539         | 1.000 |
| Small      | Treatment | Breeding Male | 4          | -          | Large     | Control   | Breeding Male   | 0.1        | 8.0918   | 5.20 | 1.55618  | 539         | 1.000 |
| Small      | Treatment | Breeding Male | 4          | -          | Large     | Control   | Breeding Male   | 4          | 11.7585  | 5.20 | 2.26134  | 539         | 1.000 |

Post Hoc Comparisons - Group Size \* Treatment \* Subject \* Time Point

| Comparison |           |               |            |            |           |                 |            |            |      |          |     |             |
|------------|-----------|---------------|------------|------------|-----------|-----------------|------------|------------|------|----------|-----|-------------|
| Group Size | Treatment | Subject       | Time Point | Group Size | Treatment | Subject         | Time Point | Difference | SE   | t        | df  | Pbonferroni |
| Small      | Treatment | Breeding Male | 4          | - Large    | Control   | Helpers         | -0.1       | 19.8630    | 5.20 | 3.81994  | 539 | 0.168       |
| Small      | Treatment | Breeding Male | 4          | - Large    | Control   | Helpers         | 0.1        | 20.8472    | 5.20 | 4.00923  | 539 | 0.078       |
| Small      | Treatment | Breeding Male | 4          | - Large    | Control   | Helpers         | 4          | 19.6070    | 5.20 | 3.77072  | 539 | 0.204       |
| Small      | Treatment | Breeding Male | 4          | - Large    | Treatment | Breeding Female | -0.1       | 8.5162     | 4.87 | 1.74878  | 544 | 1.000       |
| Small      | Treatment | Breeding Male | 4          | - Large    | Treatment | Breeding Female | 0.1        | 8.7649     | 4.87 | 1.79958  | 543 | 1.000       |
| Small      | Treatment | Breeding Male | 4          | - Large    | Treatment | Breeding Male   | -0.1       | 2.9537     | 4.87 | 0.60654  | 544 | 1.000       |
| Small      | Treatment | Breeding Male | 4          | - Large    | Treatment | Breeding Male   | 0.1        | -0.4851    | 4.87 | -0.09960 | 543 | 1.000       |
| Small      | Treatment | Breeding Male | 4          | - Large    | Treatment | Breeding Male   | 4          | -20.7351   | 4.87 | -4.25725 | 543 | 0.028       |
| Small      | Treatment | Breeding Male | 4          | - Large    | Treatment | Helpers         | -0.1       | 20.8935    | 4.87 | 4.29039  | 544 | 0.024       |
| Small      | Treatment | Breeding Male | 4          | - Large    | Treatment | Helpers         | 0.1        | 21.3906    | 4.87 | 4.39184  | 543 | 0.015       |
| Small      | Treatment | Breeding Male | 4          | - Large    | Treatment | Helpers         | 4          | 21.9018    | 4.87 | 4.49679  | 543 | 0.010       |
| Small      | Treatment | Breeding Male | 4          | - Small    | Control   | Breeding Female | -0.1       | 16.8418    | 5.20 | 3.23894  | 539 | 1.000       |
| Small      | Treatment | Breeding Male | 4          | - Small    | Control   | Breeding Female | 0.1        | 14.1752    | 5.20 | 2.72610  | 539 | 1.000       |
| Small      | Treatment | Breeding Male | 4          | - Small    | Control   | Breeding Male   | -0.1       | 7.0085     | 5.20 | 1.34784  | 539 | 1.000       |
| Small      | Treatment | Breeding Male | 4          | - Small    | Control   | Breeding Male   | 0.1        | 0.4252     | 5.20 | 0.08177  | 539 | 1.000       |
| Small      | Treatment | Breeding Male | 4          | - Small    | Control   | Breeding Male   | 4          | 7.1752     | 5.20 | 1.37989  | 539 | 1.000       |
| Small      | Treatment | Breeding Male | 4          | - Small    | Control   | Helpers         | -0.1       | 20.9113    | 5.20 | 4.02155  | 539 | 0.075       |
| Small      | Treatment | Breeding Male | 4          | - Small    | Control   | Helpers         | 0.1        | 23.4043    | 5.20 | 4.50100  | 539 | 0.009       |
| Small      | Treatment | Breeding Male | 4          | - Small    | Control   | Helpers         | 4          | 21.0988    | 5.20 | 4.05761  | 539 | 0.064       |
| Small      | Treatment | Breeding Male | 4          | - Small    | Treatment | Breeding Female | -0.1       | 17.4149    | 5.19 | 3.35305  | 551 | 0.964       |
| Small      | Treatment | Breeding Male | 4          | - Small    | Treatment | Breeding Female | 0.1        | 29.1667    | 5.19 | 5.61875  | 549 | <.001       |
| Small      | Treatment | Breeding Male | 4          | - Small    | Treatment | Breeding Male   | -0.1       | 10.9982    | 5.19 | 2.11759  | 551 | 1.000       |
| Small      | Treatment | Breeding Male | 4          | - Small    | Treatment | Breeding Male   | 0.1        | -22.9167   | 5.19 | -4.41474 | 549 | 0.014       |
| Small      | Treatment | Breeding Male | 4          | - Small    | Treatment | Helpers         | -0.1       | 20.0190    | 5.19 | 3.85445  | 551 | 0.146       |
| Small      | Treatment | Breeding Male | 4          | - Small    | Treatment | Helpers         | 0.1        | 26.8750    | 5.19 | 5.17728  | 549 | <.001       |
| Small      | Treatment | Breeding Male | 4          | - Small    | Treatment | Helpers         | 4          | 22.5625    | 5.19 | 4.34651  | 549 | 0.019       |
| Small      | Treatment | Helpers       | -0.1       | - Large    | Control   | Helpers         | -0.1       | -0.1561    | 5.20 | -0.03001 | 539 | 1.000       |
| Small      | Treatment | Helpers       | -0.1       | - Large    | Treatment | Helpers         | -0.1       | 0.8744     | 4.87 | 0.17940  | 543 | 1.000       |
| Small      | Treatment | Helpers       | -0.1       | - Small    | Control   | Helpers         | -0.1       | 0.8922     | 5.20 | 0.17156  | 539 | 1.000       |
| Small      | Treatment | Helpers       | 0.1        | - Large    | Control   | Breeding Female | -0.1       | -14.5332   | 5.20 | -2.79494 | 539 | 1.000       |
| Small      | Treatment | Helpers       | 0.1        | - Large    | Control   | Breeding Male   | -0.1       | -17.6165   | 5.20 | -3.38791 | 539 | 0.852       |
| Small      | Treatment | Helpers       | 0.1        | - Large    | Control   | Helpers         | -0.1       | -7.0120    | 5.20 | -1.34852 | 539 | 1.000       |
| Small      | Treatment | Helpers       | 0.1        | - Large    | Control   | Helpers         | 0.1        | -6.0278    | 5.20 | -1.15923 | 539 | 1.000       |
| Small      | Treatment | Helpers       | 0.1        | - Large    | Treatment | Breeding Female | -0.1       | -18.3588   | 4.87 | -3.76990 | 544 | 0.204       |
| Small      | Treatment | Helpers       | 0.1        | - Large    | Treatment | Breeding Male   | -0.1       | -23.9213   | 4.87 | -4.91213 | 544 | 0.001       |
| Small      | Treatment | Helpers       | 0.1        | - Large    | Treatment | Helpers         | -0.1       | -5.9815    | 4.87 | -1.22828 | 544 | 1.000       |
| Small      | Treatment | Helpers       | 0.1        | - Large    | Treatment | Helpers         | 0.1        | -5.4844    | 4.87 | -1.12603 | 543 | 1.000       |

Post Hoc Comparisons - Group Size \* Treatment \* Subject \* Time Point

| Comparison |           |         |            |            |           |           |                 | Difference | SE       | t    | df       | Pbonferroni |       |
|------------|-----------|---------|------------|------------|-----------|-----------|-----------------|------------|----------|------|----------|-------------|-------|
| Group Size | Treatment | Subject | Time Point | Group Size | Treatment | Subject   | Time Point      |            |          |      |          |             |       |
| Small      | Treatment | Helpers | 0.1        | -          | Small     | Control   | Breeding Female | -0.1       | -10.0332 | 5.20 | -1.92952 | 539         | 1.000 |
| Small      | Treatment | Helpers | 0.1        | -          | Small     | Control   | Breeding Male   | -0.1       | -19.8665 | 5.20 | -3.82062 | 539         | 0.168 |
| Small      | Treatment | Helpers | 0.1        | -          | Small     | Control   | Helpers         | -0.1       | -5.9637  | 5.20 | -1.14691 | 539         | 1.000 |
| Small      | Treatment | Helpers | 0.1        | -          | Small     | Control   | Helpers         | 0.1        | -3.4707  | 5.20 | -0.66746 | 539         | 1.000 |
| Small      | Treatment | Helpers | 0.1        | -          | Small     | Treatment | Breeding Female | -0.1       | -9.4601  | 5.19 | -1.82144 | 551         | 1.000 |
| Small      | Treatment | Helpers | 0.1        | -          | Small     | Treatment | Breeding Male   | -0.1       | -15.8768 | 5.19 | -3.05691 | 551         | 1.000 |
| Small      | Treatment | Helpers | 0.1        | -          | Small     | Treatment | Helpers         | -0.1       | -6.8560  | 5.19 | -1.32004 | 551         | 1.000 |
| Small      | Treatment | Helpers | 24         | -          | Large     | Control   | Breeding Female | -0.1       | -11.9082 | 5.20 | -2.29011 | 539         | 1.000 |
| Small      | Treatment | Helpers | 24         | -          | Large     | Control   | Breeding Female | 0.1        | -16.9082 | 5.20 | -3.25169 | 539         | 1.000 |
| Small      | Treatment | Helpers | 24         | -          | Large     | Control   | Breeding Female | 4          | -13.1582 | 5.20 | -2.53051 | 539         | 1.000 |
| Small      | Treatment | Helpers | 24         | -          | Large     | Control   | Breeding Male   | -0.1       | -14.9915 | 5.20 | -2.88308 | 539         | 1.000 |
| Small      | Treatment | Helpers | 24         | -          | Large     | Control   | Breeding Male   | 0.1        | -16.1582 | 5.20 | -3.10745 | 539         | 1.000 |
| Small      | Treatment | Helpers | 24         | -          | Large     | Control   | Breeding Male   | 4          | -12.4915 | 5.20 | -2.40230 | 539         | 1.000 |
| Small      | Treatment | Helpers | 24         | -          | Large     | Control   | Helpers         | -0.1       | -4.3870  | 5.20 | -0.84369 | 539         | 1.000 |
| Small      | Treatment | Helpers | 24         | -          | Large     | Control   | Helpers         | 0.1        | -3.4028  | 5.20 | -0.65441 | 539         | 1.000 |
| Small      | Treatment | Helpers | 24         | -          | Large     | Control   | Helpers         | 24         | -4.5635  | 5.20 | -0.87763 | 539         | 1.000 |
| Small      | Treatment | Helpers | 24         | -          | Large     | Control   | Helpers         | 4          | -4.6430  | 5.20 | -0.89291 | 539         | 1.000 |
| Small      | Treatment | Helpers | 24         | -          | Large     | Treatment | Breeding Female | -0.1       | -15.7338 | 4.87 | -3.23086 | 544         | 1.000 |
| Small      | Treatment | Helpers | 24         | -          | Large     | Treatment | Breeding Female | 0.1        | -15.4851 | 4.87 | -3.17934 | 543         | 1.000 |
| Small      | Treatment | Helpers | 24         | -          | Large     | Treatment | Breeding Female | 4          | 0.3274   | 4.87 | 0.06722  | 543         | 1.000 |
| Small      | Treatment | Helpers | 24         | -          | Large     | Treatment | Breeding Male   | -0.1       | -21.2963 | 4.87 | -4.37310 | 544         | 0.017 |
| Small      | Treatment | Helpers | 24         | -          | Large     | Treatment | Breeding Male   | 0.1        | -24.7351 | 4.87 | -5.07851 | 543         | <.001 |
| Small      | Treatment | Helpers | 24         | -          | Large     | Treatment | Breeding Male   | 4          | -44.9851 | 4.87 | -9.23616 | 543         | <.001 |
| Small      | Treatment | Helpers | 24         | -          | Large     | Treatment | Helpers         | -0.1       | -3.3565  | 4.87 | -0.68925 | 544         | 1.000 |
| Small      | Treatment | Helpers | 24         | -          | Large     | Treatment | Helpers         | 0.1        | -2.8594  | 4.87 | -0.58707 | 543         | 1.000 |
| Small      | Treatment | Helpers | 24         | -          | Large     | Treatment | Helpers         | 24         | -1.2637  | 4.87 | -0.25947 | 543         | 1.000 |
| Small      | Treatment | Helpers | 24         | -          | Large     | Treatment | Helpers         | 4          | -2.3482  | 4.87 | -0.48212 | 543         | 1.000 |
| Small      | Treatment | Helpers | 24         | -          | Small     | Control   | Breeding Female | -0.1       | -7.4082  | 5.20 | -1.42470 | 539         | 1.000 |
| Small      | Treatment | Helpers | 24         | -          | Small     | Control   | Breeding Female | 0.1        | -10.0748 | 5.20 | -1.93754 | 539         | 1.000 |
| Small      | Treatment | Helpers | 24         | -          | Small     | Control   | Breeding Female | 4          | -8.2415  | 5.20 | -1.58496 | 539         | 1.000 |
| Small      | Treatment | Helpers | 24         | -          | Small     | Control   | Breeding Male   | -0.1       | -17.2415 | 5.20 | -3.31579 | 539         | 1.000 |
| Small      | Treatment | Helpers | 24         | -          | Small     | Control   | Breeding Male   | 0.1        | -23.8248 | 5.20 | -4.58187 | 539         | 0.006 |
| Small      | Treatment | Helpers | 24         | -          | Small     | Control   | Breeding Male   | 4          | -17.0748 | 5.20 | -3.28374 | 539         | 1.000 |
| Small      | Treatment | Helpers | 24         | -          | Small     | Control   | Helpers         | -0.1       | -3.3387  | 5.20 | -0.64208 | 539         | 1.000 |
| Small      | Treatment | Helpers | 24         | -          | Small     | Control   | Helpers         | 0.1        | -0.8457  | 5.20 | -0.16263 | 539         | 1.000 |
| Small      | Treatment | Helpers | 24         | -          | Small     | Control   | Helpers         | 24         | -2.7762  | 5.20 | -0.53391 | 539         | 1.000 |
| Small      | Treatment | Helpers | 24         | -          | Small     | Control   | Helpers         | 4          | -3.1512  | 5.20 | -0.60602 | 539         | 1.000 |
| Small      | Treatment | Helpers | 24         | -          | Small     | Treatment | Breeding Female | -0.1       | -6.8351  | 5.19 | -1.31603 | 551         | 1.000 |
| Small      | Treatment | Helpers | 24         | -          | Small     | Treatment | Breeding Female | 0.1        | 4.9167   | 5.19 | 0.94716  | 549         | 1.000 |
| Small      | Treatment | Helpers | 24         | -          | Small     | Treatment | Breeding Female | 4          | -2.3333  | 5.19 | -0.44950 | 549         | 1.000 |
| Small      | Treatment | Helpers | 24         | -          | Small     | Treatment | Breeding Male   | -0.1       | -13.2518 | 5.19 | -2.55149 | 551         | 1.000 |

Post Hoc Comparisons - Group Size \* Treatment \* Subject \* Time Point

|            |           |         |            | Comparison |           |           |                 | Difference | SE       | t    | df       | Pbonferroni |       |
|------------|-----------|---------|------------|------------|-----------|-----------|-----------------|------------|----------|------|----------|-------------|-------|
| Group Size | Treatment | Subject | Time Point | Group Size | Treatment | Subject   | Time Point      |            |          |      |          |             |       |
| Small      | Treatment | Helpers | 24         | -          | Small     | Treatment | Breeding Male   | 0.1        | -47.1667 | 5.19 | -9.08633 | 549         | <.001 |
| Small      | Treatment | Helpers | 24         | -          | Small     | Treatment | Breeding Male   | 4          | -24.2500 | 5.19 | -4.67159 | 549         | 0.004 |
| Small      | Treatment | Helpers | 24         | -          | Small     | Treatment | Helpers         | -0.1       | -4.2310  | 5.19 | -0.81462 | 551         | 1.000 |
| Small      | Treatment | Helpers | 24         | -          | Small     | Treatment | Helpers         | 0.1        | 2.6250   | 5.19 | 0.50569  | 549         | 1.000 |
| Small      | Treatment | Helpers | 24         | -          | Small     | Treatment | Helpers         | 4          | -1.6875  | 5.19 | -0.32509 | 549         | 1.000 |
| Small      | Treatment | Helpers | 4          | -          | Large     | Control   | Breeding Female | -0.1       | -10.2207 | 5.20 | -1.96558 | 539         | 1.000 |
| Small      | Treatment | Helpers | 4          | -          | Large     | Control   | Breeding Female | 0.1        | -15.2207 | 5.20 | -2.92716 | 539         | 1.000 |
| Small      | Treatment | Helpers | 4          | -          | Large     | Control   | Breeding Male   | -0.1       | -13.3040 | 5.20 | -2.55855 | 539         | 1.000 |
| Small      | Treatment | Helpers | 4          | -          | Large     | Control   | Breeding Male   | 0.1        | -14.4707 | 5.20 | -2.78292 | 539         | 1.000 |
| Small      | Treatment | Helpers | 4          | -          | Large     | Control   | Helpers         | -0.1       | -2.6995  | 5.20 | -0.51916 | 539         | 1.000 |
| Small      | Treatment | Helpers | 4          | -          | Large     | Control   | Helpers         | 0.1        | -1.7153  | 5.20 | -0.32988 | 539         | 1.000 |
| Small      | Treatment | Helpers | 4          | -          | Large     | Control   | Helpers         | 4          | -2.9555  | 5.20 | -0.56838 | 539         | 1.000 |
| Small      | Treatment | Helpers | 4          | -          | Large     | Treatment | Breeding Female | -0.1       | -14.0463 | 4.87 | -2.88434 | 544         | 1.000 |
| Small      | Treatment | Helpers | 4          | -          | Large     | Treatment | Breeding Female | 0.1        | -13.7976 | 4.87 | -2.83287 | 543         | 1.000 |
| Small      | Treatment | Helpers | 4          | -          | Large     | Treatment | Breeding Male   | -0.1       | -19.6088 | 4.87 | -4.02658 | 544         | 0.073 |
| Small      | Treatment | Helpers | 4          | -          | Large     | Treatment | Breeding Male   | 0.1        | -23.0476 | 4.87 | -4.73204 | 543         | 0.003 |
| Small      | Treatment | Helpers | 4          | -          | Large     | Treatment | Helpers         | -0.1       | -1.6690  | 4.87 | -0.34273 | 544         | 1.000 |
| Small      | Treatment | Helpers | 4          | -          | Large     | Treatment | Helpers         | 0.1        | -1.1719  | 4.87 | -0.24060 | 543         | 1.000 |
| Small      | Treatment | Helpers | 4          | -          | Large     | Treatment | Helpers         | 4          | -0.6607  | 4.87 | -0.13565 | 543         | 1.000 |
| Small      | Treatment | Helpers | 4          | -          | Small     | Control   | Breeding Female | -0.1       | -5.7207  | 5.20 | -1.10017 | 539         | 1.000 |
| Small      | Treatment | Helpers | 4          | -          | Small     | Control   | Breeding Female | 0.1        | -8.3873  | 5.20 | -1.61301 | 539         | 1.000 |
| Small      | Treatment | Helpers | 4          | -          | Small     | Control   | Breeding Male   | -0.1       | -15.5540 | 5.20 | -2.99126 | 539         | 1.000 |
| Small      | Treatment | Helpers | 4          | -          | Small     | Control   | Breeding Male   | 0.1        | -22.1373 | 5.20 | -4.25733 | 539         | 0.028 |
| Small      | Treatment | Helpers | 4          | -          | Small     | Control   | Helpers         | -0.1       | -1.6512  | 5.20 | -0.31755 | 539         | 1.000 |
| Small      | Treatment | Helpers | 4          | -          | Small     | Control   | Helpers         | 0.1        | 0.8418   | 5.20 | 0.16190  | 539         | 1.000 |
| Small      | Treatment | Helpers | 4          | -          | Small     | Control   | Helpers         | 4          | -1.4637  | 5.20 | -0.28149 | 539         | 1.000 |
| Small      | Treatment | Helpers | 4          | -          | Small     | Treatment | Breeding Female | -0.1       | -5.1476  | 5.19 | -0.99112 | 551         | 1.000 |
| Small      | Treatment | Helpers | 4          | -          | Small     | Treatment | Breeding Female | 0.1        | 6.6042   | 5.19 | 1.27225  | 549         | 1.000 |
| Small      | Treatment | Helpers | 4          | -          | Small     | Treatment | Breeding Male   | -0.1       | -11.5643 | 5.19 | -2.22658 | 551         | 1.000 |
| Small      | Treatment | Helpers | 4          | -          | Small     | Treatment | Breeding Male   | 0.1        | -45.4792 | 5.19 | -8.76124 | 549         | <.001 |
| Small      | Treatment | Helpers | 4          | -          | Small     | Treatment | Helpers         | -0.1       | -2.5435  | 5.19 | -0.48971 | 551         | 1.000 |
| Small      | Treatment | Helpers | 4          | -          | Small     | Treatment | Helpers         | 0.1        | 4.3125   | 5.19 | 0.83077  | 549         | 1.000 |



**Table S2.** Post-hoc Comparisons for Affiliation Index Analysis - Treatment × Group Size × Timepoint

|            |           | Comparison |            |           |            |      | Difference | SE     | t       | df    | Pbonferroni |
|------------|-----------|------------|------------|-----------|------------|------|------------|--------|---------|-------|-------------|
| Group Size | Treatment | Time Point | Group Size | Treatment | Time Point |      |            |        |         |       |             |
| Large      | Control   | 0.1        | -          | Large     | Control    | -0.1 | -0.05066   | 0.0385 | -1.3144 | 579.0 | 1.000       |
| Large      | Control   | 0.1        | -          | Large     | Treatment  | -0.1 | -0.00903   | 0.0471 | -0.1918 | 68.4  | 1.000       |
| Large      | Control   | 0.1        | -          | Small     | Control    | -0.1 | -0.05228   | 0.0504 | -1.0380 | 68.4  | 1.000       |
| Large      | Control   | 0.1        | -          | Small     | Treatment  | -0.1 | -0.11253   | 0.0504 | -2.2344 | 68.4  | 1.000       |
| Large      | Control   | 24         | -          | Large     | Control    | -0.1 | -0.02452   | 0.0385 | -0.6362 | 579.0 | 1.000       |
| Large      | Control   | 24         | -          | Large     | Control    | 0.1  | 0.02614    | 0.0385 | 0.6781  | 579.0 | 1.000       |
| Large      | Control   | 24         | -          | Large     | Control    | 4    | -0.02786   | 0.0385 | -0.7227 | 579.0 | 1.000       |
| Large      | Control   | 24         | -          | Large     | Treatment  | -0.1 | 0.01710    | 0.0471 | 0.3631  | 68.4  | 1.000       |
| Large      | Control   | 24         | -          | Large     | Treatment  | 0.1  | -0.11565   | 0.0471 | -2.4548 | 68.4  | 1.000       |
| Large      | Control   | 24         | -          | Large     | Treatment  | 4    | -0.09375   | 0.0471 | -1.9900 | 68.4  | 1.000       |
| Large      | Control   | 24         | -          | Small     | Control    | -0.1 | -0.02614   | 0.0504 | -0.5189 | 68.4  | 1.000       |
| Large      | Control   | 24         | -          | Small     | Control    | 0.1  | -0.04477   | 0.0504 | -0.8890 | 68.4  | 1.000       |
| Large      | Control   | 24         | -          | Small     | Control    | 4    | -0.07661   | 0.0504 | -1.5211 | 68.4  | 1.000       |
| Large      | Control   | 24         | -          | Small     | Treatment  | -0.1 | -0.08639   | 0.0504 | -1.7154 | 68.4  | 1.000       |
| Large      | Control   | 24         | -          | Small     | Treatment  | 0.1  | 0.02998    | 0.0504 | 0.5952  | 68.4  | 1.000       |
| Large      | Control   | 24         | -          | Small     | Treatment  | 4    | -0.07475   | 0.0504 | -1.4842 | 68.4  | 1.000       |
| Large      | Control   | 4          | -          | Large     | Control    | -0.1 | 0.00333    | 0.0385 | 0.0865  | 579.0 | 1.000       |
| Large      | Control   | 4          | -          | Large     | Control    | 0.1  | 0.05400    | 0.0385 | 1.4009  | 579.0 | 1.000       |
| Large      | Control   | 4          | -          | Large     | Treatment  | -0.1 | 0.04496    | 0.0471 | 0.9544  | 68.4  | 1.000       |
| Large      | Control   | 4          | -          | Large     | Treatment  | 0.1  | -0.08779   | 0.0471 | -1.8634 | 68.4  | 1.000       |
| Large      | Control   | 4          | -          | Small     | Control    | -0.1 | 0.00172    | 0.0504 | 0.0342  | 68.4  | 1.000       |
| Large      | Control   | 4          | -          | Small     | Control    | 0.1  | -0.01691   | 0.0504 | -0.3358 | 68.4  | 1.000       |
| Large      | Control   | 4          | -          | Small     | Treatment  | -0.1 | -0.05853   | 0.0504 | -1.1622 | 68.4  | 1.000       |
| Large      | Control   | 4          | -          | Small     | Treatment  | 0.1  | 0.05784    | 0.0504 | 1.1484  | 68.4  | 1.000       |
| Large      | Treatment | -0.1       | -          | Large     | Control    | -0.1 | -0.04163   | 0.0471 | -0.8837 | 68.4  | 1.000       |
| Large      | Treatment | -0.1       | -          | Small     | Control    | -0.1 | -0.04324   | 0.0471 | -0.9178 | 68.4  | 1.000       |
| Large      | Treatment | 0.1        | -          | Large     | Control    | -0.1 | 0.09112    | 0.0471 | 1.9342  | 68.4  | 1.000       |
| Large      | Treatment | 0.1        | -          | Large     | Control    | 0.1  | 0.14179    | 0.0471 | 3.0096  | 68.4  | 0.439       |
| Large      | Treatment | 0.1        | -          | Large     | Treatment  | -0.1 | 0.13275    | 0.0334 | 3.9767  | 579.0 | 0.009       |
| Large      | Treatment | 0.1        | -          | Small     | Control    | -0.1 | 0.08951    | 0.0471 | 1.9000  | 68.4  | 1.000       |
| Large      | Treatment | 0.1        | -          | Small     | Control    | 0.1  | 0.07087    | 0.0471 | 1.5044  | 68.4  | 1.000       |
| Large      | Treatment | 0.1        | -          | Small     | Treatment  | -0.1 | 0.02925    | 0.0471 | 0.6210  | 68.4  | 1.000       |
| Large      | Treatment | 24         | -          | Large     | Control    | -0.1 | 0.06344    | 0.0471 | 1.3466  | 68.4  | 1.000       |
| Large      | Treatment | 24         | -          | Large     | Control    | 0.1  | 0.11411    | 0.0471 | 2.4221  | 68.4  | 1.000       |
| Large      | Treatment | 24         | -          | Large     | Control    | 24   | 0.08797    | 0.0471 | 1.8672  | 68.4  | 1.000       |
| Large      | Treatment | 24         | -          | Large     | Control    | 4    | 0.06011    | 0.0471 | 1.2759  | 68.4  | 1.000       |
| Large      | Treatment | 24         | -          | Large     | Treatment  | -0.1 | 0.10507    | 0.0334 | 3.1475  | 579.0 | 0.208       |
| Large      | Treatment | 24         | -          | Large     | Treatment  | 0.1  | -0.02768   | 0.0334 | -0.8292 | 579.0 | 1.000       |
| Large      | Treatment | 24         | -          | Large     | Treatment  | 4    | -0.00579   | 0.0334 | -0.1733 | 579.0 | 1.000       |
| Large      | Treatment | 24         | -          | Small     | Control    | -0.1 | 0.06183    | 0.0471 | 1.3124  | 68.4  | 1.000       |
| Large      | Treatment | 24         | -          | Small     | Control    | 0.1  | 0.04319    | 0.0471 | 0.9168  | 68.4  | 1.000       |
| Large      | Treatment | 24         | -          | Small     | Control    | 24   | 0.03498    | 0.0471 | 0.7425  | 68.4  | 1.000       |
| Large      | Treatment | 24         | -          | Small     | Control    | 4    | 0.01136    | 0.0471 | 0.2411  | 68.4  | 1.000       |
| Large      | Treatment | 24         | -          | Small     | Treatment  | -0.1 | 0.00157    | 0.0471 | 0.0334  | 68.4  | 1.000       |
| Large      | Treatment | 24         | -          | Small     | Treatment  | 0.1  | 0.11794    | 0.0471 | 2.5035  | 68.4  | 1.000       |
| Large      | Treatment | 24         | -          | Small     | Treatment  | 4    | 0.01322    | 0.0471 | 0.2805  | 68.4  | 1.000       |
| Large      | Treatment | 4          | -          | Large     | Control    | -0.1 | 0.06923    | 0.0471 | 1.4694  | 68.4  | 1.000       |
| Large      | Treatment | 4          | -          | Large     | Control    | 0.1  | 0.11989    | 0.0471 | 2.5449  | 68.4  | 1.000       |
| Large      | Treatment | 4          | -          | Large     | Control    | 4    | 0.06589    | 0.0471 | 1.3987  | 68.4  | 1.000       |
| Large      | Treatment | 4          | -          | Large     | Treatment  | -0.1 | 0.11086    | 0.0334 | 3.3208  | 579.0 | 0.114       |
| Large      | Treatment | 4          | -          | Large     | Treatment  | 0.1  | -0.02190   | 0.0334 | -0.6559 | 579.0 | 1.000       |
| Large      | Treatment | 4          | -          | Small     | Control    | -0.1 | 0.06762    | 0.0471 | 1.4352  | 68.4  | 1.000       |

Post Hoc Comparisons - Group Size \* Treatment \* Time Point

| Comparison |           |            |            |           |            | Difference | SE       | t      | df      | Pbonferroni |       |
|------------|-----------|------------|------------|-----------|------------|------------|----------|--------|---------|-------------|-------|
| Group Size | Treatment | Time Point | Group Size | Treatment | Time Point |            |          |        |         |             |       |
| Large      | Treatment | 4          | -          | Small     | Control    | 0.1        | 0.04898  | 0.0471 | 1.0396  | 68.4        | 1.000 |
| Large      | Treatment | 4          | -          | Small     | Control    | 4          | 0.01714  | 0.0471 | 0.3639  | 68.4        | 1.000 |
| Large      | Treatment | 4          | -          | Small     | Treatment  | -0.1       | 0.00736  | 0.0471 | 0.1562  | 68.4        | 1.000 |
| Large      | Treatment | 4          | -          | Small     | Treatment  | 0.1        | 0.12373  | 0.0471 | 2.6263  | 68.4        | 1.000 |
| Small      | Control   | -0.1       | -          | Large     | Control    | -0.1       | 0.00161  | 0.0504 | 0.0320  | 68.4        | 1.000 |
| Small      | Control   | 0.1        | -          | Large     | Control    | -0.1       | 0.02025  | 0.0504 | 0.4020  | 68.4        | 1.000 |
| Small      | Control   | 0.1        | -          | Large     | Control    | 0.1        | 0.07091  | 0.0504 | 1.4080  | 68.4        | 1.000 |
| Small      | Control   | 0.1        | -          | Large     | Treatment  | -0.1       | 0.06188  | 0.0471 | 1.3134  | 68.4        | 1.000 |
| Small      | Control   | 0.1        | -          | Small     | Control    | -0.1       | 0.01864  | 0.0385 | 0.4835  | 579.0       | 1.000 |
| Small      | Control   | 0.1        | -          | Small     | Treatment  | -0.1       | -0.04162 | 0.0504 | -0.8264 | 68.4        | 1.000 |
| Small      | Control   | 24         | -          | Large     | Control    | -0.1       | 0.02846  | 0.0504 | 0.5651  | 68.4        | 1.000 |
| Small      | Control   | 24         | -          | Large     | Control    | 0.1        | 0.07912  | 0.0504 | 1.5711  | 68.4        | 1.000 |
| Small      | Control   | 24         | -          | Large     | Control    | 24         | 0.05298  | 0.0504 | 1.0520  | 68.4        | 1.000 |
| Small      | Control   | 24         | -          | Large     | Control    | 4          | 0.02513  | 0.0504 | 0.4989  | 68.4        | 1.000 |
| Small      | Control   | 24         | -          | Large     | Treatment  | -0.1       | 0.07009  | 0.0471 | 1.4878  | 68.4        | 1.000 |
| Small      | Control   | 24         | -          | Large     | Treatment  | 0.1        | -0.06266 | 0.0471 | -1.3301 | 68.4        | 1.000 |
| Small      | Control   | 24         | -          | Large     | Treatment  | 4          | -0.04077 | 0.0471 | -0.8653 | 68.4        | 1.000 |
| Small      | Control   | 24         | -          | Small     | Control    | -0.1       | 0.02685  | 0.0385 | 0.6965  | 579.0       | 1.000 |
| Small      | Control   | 24         | -          | Small     | Control    | 0.1        | 0.00821  | 0.0385 | 0.2130  | 579.0       | 1.000 |
| Small      | Control   | 24         | -          | Small     | Control    | 4          | -0.02362 | 0.0385 | -0.6129 | 579.0       | 1.000 |
| Small      | Control   | 24         | -          | Small     | Treatment  | -0.1       | -0.03341 | 0.0504 | -0.6633 | 68.4        | 1.000 |
| Small      | Control   | 24         | -          | Small     | Treatment  | 0.1        | 0.08296  | 0.0504 | 1.6473  | 68.4        | 1.000 |
| Small      | Control   | 24         | -          | Small     | Treatment  | 4          | -0.02177 | 0.0504 | -0.4322 | 68.4        | 1.000 |
| Small      | Control   | 4          | -          | Large     | Control    | -0.1       | 0.05209  | 0.0504 | 1.0342  | 68.4        | 1.000 |
| Small      | Control   | 4          | -          | Large     | Control    | 0.1        | 0.10275  | 0.0504 | 2.0401  | 68.4        | 1.000 |
| Small      | Control   | 4          | -          | Large     | Control    | 4          | 0.04875  | 0.0504 | 0.9680  | 68.4        | 1.000 |
| Small      | Control   | 4          | -          | Large     | Treatment  | -0.1       | 0.09371  | 0.0471 | 1.9892  | 68.4        | 1.000 |
| Small      | Control   | 4          | -          | Large     | Treatment  | 0.1        | -0.03904 | 0.0471 | -0.8286 | 68.4        | 1.000 |
| Small      | Control   | 4          | -          | Small     | Control    | -0.1       | 0.05047  | 0.0385 | 1.3094  | 579.0       | 1.000 |
| Small      | Control   | 4          | -          | Small     | Control    | 0.1        | 0.03184  | 0.0385 | 0.8259  | 579.0       | 1.000 |
| Small      | Control   | 4          | -          | Small     | Treatment  | -0.1       | -0.00978 | 0.0504 | -0.1942 | 68.4        | 1.000 |
| Small      | Control   | 4          | -          | Small     | Treatment  | 0.1        | 0.10659  | 0.0504 | 2.1164  | 68.4        | 1.000 |
| Small      | Treatment | -0.1       | -          | Large     | Control    | -0.1       | 0.06187  | 0.0504 | 1.2284  | 68.4        | 1.000 |
| Small      | Treatment | -0.1       | -          | Large     | Treatment  | -0.1       | 0.10350  | 0.0471 | 2.1969  | 68.4        | 1.000 |
| Small      | Treatment | -0.1       | -          | Small     | Control    | -0.1       | 0.06026  | 0.0504 | 1.1964  | 68.4        | 1.000 |
| Small      | Treatment | 0.1        | -          | Large     | Control    | -0.1       | -0.05450 | 0.0504 | -1.0822 | 68.4        | 1.000 |
| Small      | Treatment | 0.1        | -          | Large     | Control    | 0.1        | -0.00384 | 0.0504 | -0.0762 | 68.4        | 1.000 |
| Small      | Treatment | 0.1        | -          | Large     | Treatment  | -0.1       | -0.01287 | 0.0471 | -0.2732 | 68.4        | 1.000 |
| Small      | Treatment | 0.1        | -          | Large     | Treatment  | 0.1        | -0.14562 | 0.0471 | -3.0911 | 68.4        | 0.346 |
| Small      | Treatment | 0.1        | -          | Small     | Control    | -0.1       | -0.05611 | 0.0504 | -1.1142 | 68.4        | 1.000 |
| Small      | Treatment | 0.1        | -          | Small     | Control    | 0.1        | -0.07475 | 0.0504 | -1.4842 | 68.4        | 1.000 |
| Small      | Treatment | 0.1        | -          | Small     | Treatment  | -0.1       | -0.11637 | 0.0385 | -3.0190 | 579.0       | 0.318 |
| Small      | Treatment | 24         | -          | Large     | Control    | -0.1       | 0.07404  | 0.0504 | 1.4701  | 68.4        | 1.000 |
| Small      | Treatment | 24         | -          | Large     | Control    | 0.1        | 0.12470  | 0.0504 | 2.4761  | 68.4        | 1.000 |
| Small      | Treatment | 24         | -          | Large     | Control    | 24         | 0.09856  | 0.0504 | 1.9571  | 68.4        | 1.000 |
| Small      | Treatment | 24         | -          | Large     | Control    | 4          | 0.07071  | 0.0504 | 1.4039  | 68.4        | 1.000 |
| Small      | Treatment | 24         | -          | Large     | Treatment  | -0.1       | 0.11567  | 0.0471 | 2.4553  | 68.4        | 1.000 |
| Small      | Treatment | 24         | -          | Large     | Treatment  | 0.1        | -0.01708 | 0.0471 | -0.3626 | 68.4        | 1.000 |
| Small      | Treatment | 24         | -          | Large     | Treatment  | 24         | 0.01060  | 0.0471 | 0.2250  | 68.4        | 1.000 |
| Small      | Treatment | 24         | -          | Large     | Treatment  | 4          | 0.00481  | 0.0471 | 0.1022  | 68.4        | 1.000 |
| Small      | Treatment | 24         | -          | Small     | Control    | -0.1       | 0.07243  | 0.0504 | 1.4381  | 68.4        | 1.000 |
| Small      | Treatment | 24         | -          | Small     | Control    | 0.1        | 0.05379  | 0.0504 | 1.0681  | 68.4        | 1.000 |
| Small      | Treatment | 24         | -          | Small     | Control    | 24         | 0.04558  | 0.0504 | 0.9050  | 68.4        | 1.000 |

Post Hoc Comparisons - Group Size \* Treatment \* Time Point

| Comparison |           |            |   |            |           |            |            |        |         |       |             |
|------------|-----------|------------|---|------------|-----------|------------|------------|--------|---------|-------|-------------|
| Group Size | Treatment | Time Point |   | Group Size | Treatment | Time Point | Difference | SE     | t       | df    | Pbonferroni |
| Small      | Treatment | 24         | - | Small      | Control   | 4          | 0.02196    | 0.0504 | 0.4359  | 68.4  | 1.000       |
| Small      | Treatment | 24         | - | Small      | Treatment | -0.1       | 0.01217    | 0.0385 | 0.3158  | 579.0 | 1.000       |
| Small      | Treatment | 24         | - | Small      | Treatment | 0.1        | 0.12854    | 0.0385 | 3.3348  | 579.0 | 0.109       |
| Small      | Treatment | 24         | - | Small      | Treatment | 4          | 0.02381    | 0.0385 | 0.6178  | 579.0 | 1.000       |
| Small      | Treatment | 4          | - | Large      | Control   | -0.1       | 0.05023    | 0.0504 | 0.9973  | 68.4  | 1.000       |
| Small      | Treatment | 4          | - | Large      | Control   | 0.1        | 0.10089    | 0.0504 | 2.0032  | 68.4  | 1.000       |
| Small      | Treatment | 4          | - | Large      | Control   | 4          | 0.04689    | 0.0504 | 0.9311  | 68.4  | 1.000       |
| Small      | Treatment | 4          | - | Large      | Treatment | -0.1       | 0.09185    | 0.0471 | 1.9498  | 68.4  | 1.000       |
| Small      | Treatment | 4          | - | Large      | Treatment | 0.1        | -0.04090   | 0.0471 | -0.8681 | 68.4  | 1.000       |
| Small      | Treatment | 4          | - | Large      | Treatment | 4          | -0.01900   | 0.0471 | -0.4033 | 68.4  | 1.000       |
| Small      | Treatment | 4          | - | Small      | Control   | -0.1       | 0.04861    | 0.0504 | 0.9653  | 68.4  | 1.000       |
| Small      | Treatment | 4          | - | Small      | Control   | 0.1        | 0.02998    | 0.0504 | 0.5952  | 68.4  | 1.000       |
| Small      | Treatment | 4          | - | Small      | Control   | 4          | -0.00186   | 0.0504 | -0.0369 | 68.4  | 1.000       |
| Small      | Treatment | 4          | - | Small      | Treatment | -0.1       | -0.01164   | 0.0385 | -0.3020 | 579.0 | 1.000       |
| Small      | Treatment | 4          | - | Small      | Treatment | 0.1        | 0.10473    | 0.0385 | 2.7169  | 579.0 | 0.814       |

**Table S3.** Readme file. Behavioral data was collected in McMaster University's Animal Behaviour Ecology Laboratory (ABEL) from February 29, 2019 to March 2, 2020. Video recordings were scored from March 13, 2019 to June 6, 2019. Tissue samples were collected March 3, 2019 and assays were conducted from June 11, 2019 to June 20. All the data for this paper was analyzed from June 27, 2019 to September 16, 2019.

The dataset (Dataset 1) is contained in an Excel worksheet organized by columns. The column labels (variables of interest) and how this data was scored are as follows:

| Labels           | Factor Values                                                                                  | Meaning                                                                                                                                                                                                                                                                                                                                                                                                                                                                                                                                                                                                                                                                                                                                         |
|------------------|------------------------------------------------------------------------------------------------|-------------------------------------------------------------------------------------------------------------------------------------------------------------------------------------------------------------------------------------------------------------------------------------------------------------------------------------------------------------------------------------------------------------------------------------------------------------------------------------------------------------------------------------------------------------------------------------------------------------------------------------------------------------------------------------------------------------------------------------------------|
| Tank Number_n    | 1-2, 4-13, 15-16, 18-19, 22, 24-31, 34                                                         | Tank ID                                                                                                                                                                                                                                                                                                                                                                                                                                                                                                                                                                                                                                                                                                                                         |
| Group Size       | Small, Large                                                                                   | Binary categorization of group size, with groups either being Small (containing 4 or fewer Helper Fish) or Large (containing 5 or greater Helper Fish).                                                                                                                                                                                                                                                                                                                                                                                                                                                                                                                                                                                         |
| Treatment        | Treatment, Control                                                                             | Binary categorization of treatment type.                                                                                                                                                                                                                                                                                                                                                                                                                                                                                                                                                                                                                                                                                                        |
| Subject          | Breeding Male, Breeding Female, Helpers                                                        | Fish class, being Breeding Male (the dominant male of the group), Breeding Female (the dominant female of the group) or Helpers (all of the remaining fish, collectively).                                                                                                                                                                                                                                                                                                                                                                                                                                                                                                                                                                      |
| Observation Type | Pre 1, Pre 2, Post 1, Post 2, 4 Hours Post 1, 4 Hours Post 2, 24 Hours Post 1, 24 Hours Post 2 | The time step of the observation. The time steps listed are: Pre 1 (recording occurred immediately before the first social perturbation), Pre 2 (recording occurred immediately before the second social perturbation), Post 1 (recording occurred immediately after the first social perturbation), Post 2 (recording occurred immediately after the second social perturbation), 4 Hours Post 1 (recording occurred 4 hours following the first social perturbation), 4 Hours Post 2 (recording occurred 4 hours following the second social perturbation), 24 Hours Post 1 (recording occurred 24 hours following the first social perturbation) and 24 Hours Post 2 (recording occurred 24 hours following the second social perturbation). |
| Male_ID          | A letter/integer combination                                                                   | A unique combination of a letter and number that identifies each male. The                                                                                                                                                                                                                                                                                                                                                                                                                                                                                                                                                                                                                                                                      |

|                           |                    |                                                                                                                                                                                                                                                               |
|---------------------------|--------------------|---------------------------------------------------------------------------------------------------------------------------------------------------------------------------------------------------------------------------------------------------------------|
|                           |                    | number indicates the tank the male started in at the beginning of the experiment.                                                                                                                                                                             |
| Helper #_n                | Range: 1-8         | The number of helpers within the group during experimental treatments.                                                                                                                                                                                        |
| Trial #_n                 | 1, 2               | The observation block, being either 1 (associated with the first social perturbation) or 2 (associated with the second social perturbation).                                                                                                                  |
| Hours                     | -0.1, 0.1, 4, 24   | The number of hours before or after the social perturbation the observation occurred, being -0.1 (immediately before the perturbation), 0.1 (immediately after the perturbation), 4 (4 hours after the perturbation) or 24 (24 hours after the perturbation). |
| Agg_dirac                 | Continuous integer | Aggressive acts by the focal fish toward another subject, including both other fish in the social group and its own reflection. Was not used in the calculation of Dominance Index.                                                                           |
| Agg_dirac_nomirror        | Continuous integer | Aggressive acts by the focal fish toward another fish. Excludes aggressive acts toward reflections. Was used in the calculation of Dominance Index.                                                                                                           |
| Social_dirac              | Continuous integer | Affiliative acts performed by the focal fish to another fish.                                                                                                                                                                                                 |
| Sub_dirac                 | Continuous integer | Submissive acts by the focal fish toward another subject, including both other fish and reflections.                                                                                                                                                          |
| Agg_rec                   | Continuous integer | Aggressive acts received by the focal fish from another fish.                                                                                                                                                                                                 |
| Social_rec                | Continuous integer | Affiliative acts received by the focal fish from another fish.                                                                                                                                                                                                |
| Sub_rec                   | Continuous integer | Submissive acts received by the focal fish from another fish.                                                                                                                                                                                                 |
| Self_Maintenance          | Continuous integer | Personal maintenance behaviors performed by the fish, including the initiation of swimming, remaining still, yawning etc. Not used in any of the analysis.                                                                                                    |
| Territorial Maintenance_n | Continuous integer | Behaviors performed by the focal fish in the maintenance of the group's territory.                                                                                                                                                                            |
| Still Duration (s)        | Continuous         | The duration of time (in seconds) that the focal fish was still (no active locomotion). Does not include time when the fish was not visible to the observer. Was not recorded for helpers.                                                                    |

|                                    |                    |                                                                                                                                                                                                                                            |
|------------------------------------|--------------------|--------------------------------------------------------------------------------------------------------------------------------------------------------------------------------------------------------------------------------------------|
| Swim Duration (s)                  | Continuous         | The duration of time (in seconds) that the focal fish was actively swimming. Does not include time when the fish was not visible to the observer. Was not recorded for helpers.                                                            |
| Activity                           | Continuous         | Calculated by dividing the total time the focal fish was observed swimming in an observation over the total time the fish was observed swimming or still:<br>Swim Duration / (Swim Duration + Still Duration)<br>Not relevant for helpers. |
| Dominance_Index                    | Continuous Integer | (Sum of aggressive acts given + sum of submissive acts received) – (sum of aggressive acts received + sum of submissive acts given) (Aubin-Horth et al., 2007)<br>Does not include acts toward reflections.                                |
| Dominance per capita for helpers   | Continuous         | Only relevant for helpers. The dominance index divided by the number of helpers in the group.                                                                                                                                              |
| Co-op per capita for helpers       |                    | Only relevant for helpers. The territorial maintenance actions divided by the number of helpers in the group.                                                                                                                              |
| Affiliation per capita for helpers |                    | Only relevant for helpers. The affiliation index divided by the number of helpers in the group.                                                                                                                                            |
