# Supplementary material for: Behavioral and physiological evidence that increasing group size ameliorates the impacts of social disturbance
Source: Oxford University Press journal article supplement (doi:10.1242/jeb.217075), 2020-06-12
Supplement: jeb217075supp.pdf [file jeb217075supp.pdf]

## Dataset 1

[Click here to Download Dataset 1](#)

Table S1. Post Hoc Comparisons - Treatment \* Hours \* Group Size \* Subject

| Comparison |       |            |         |           |           |            |         |            |          |      |          |             |        |
|------------|-------|------------|---------|-----------|-----------|------------|---------|------------|----------|------|----------|-------------|--------|
| Treatment  | Hours | Group Size | Subject | Treatment | Hours     | Group Size | Subject | Difference | SE       | t    | df       | Pbonferroni |        |
| Control    | -0.1  | Large      | Female  | -         | Control   | -0.1       | Large   | Male       | -3.0833  | 5.19 | -0.59395 | 554         | 1.000  |
| Control    | -0.1  | Large      | Female  | -         | Control   | -0.1       | Small   | Female     | 4.5000   | 5.20 | 0.86593  | 543         | 1.000  |
| Control    | -0.1  | Large      | Female  | -         | Control   | -0.1       | Small   | Male       | -5.3333  | 5.20 | -1.02629 | 543         | 1.000  |
| Control    | -0.1  | Large      | Female  | -         | Control   | 0.1        | Large   | Female     | -5.0000  | 5.19 | -0.96316 | 554         | 1.000  |
| Control    | -0.1  | Large      | Female  | -         | Control   | 0.1        | Large   | Male       | -4.2500  | 5.19 | -0.81869 | 554         | 1.000  |
| Control    | -0.1  | Large      | Female  | -         | Control   | 0.1        | Small   | Female     | 1.8333   | 5.20 | 0.35279  | 543         | 1.000  |
| Control    | -0.1  | Large      | Female  | -         | Control   | 0.1        | Small   | Male       | -11.9167 | 5.20 | -2.29312 | 543         | 1.000  |
| Control    | -0.1  | Large      | Female  | -         | Control   | 24         | Large   | Female     | -2.0833  | 5.19 | -0.40132 | 554         | 1.000  |
| Control    | -0.1  | Large      | Female  | -         | Control   | 24         | Large   | Male       | -0.5000  | 5.19 | -0.09632 | 554         | 1.000  |
| Control    | -0.1  | Large      | Female  | -         | Control   | 24         | Small   | Female     | 3.7500   | 5.20 | 0.72161  | 543         | 1.000  |
| Control    | -0.1  | Large      | Female  | -         | Control   | 24         | Small   | Male       | -6.6667  | 5.20 | -1.28287 | 543         | 1.000  |
| Control    | -0.1  | Large      | Female  | -         | Control   | 4          | Large   | Female     | -1.2500  | 5.19 | -0.24079 | 554         | 1.000  |
| Control    | -0.1  | Large      | Female  | -         | Control   | 4          | Large   | Male       | -0.5833  | 5.19 | -0.11237 | 554         | 1.000  |
| Control    | -0.1  | Large      | Female  | -         | Control   | 4          | Small   | Female     | 3.6667   | 5.20 | 0.70558  | 543         | 1.000  |
| Control    | -0.1  | Large      | Female  | -         | Control   | 4          | Small   | Male       | -5.1667  | 5.20 | -0.99422 | 543         | 1.000  |
| Control    | -0.1  | Large      | Female  | -         | Treatment | -0.1       | Large   | Female     | -3.8333  | 4.86 | -0.78858 | 543         | 1.000  |
| Control    | -0.1  | Large      | Female  | -         | Treatment | -0.1       | Large   | Male       | -9.3958  | 4.86 | -1.93287 | 543         | 1.000  |
| Control    | -0.1  | Large      | Female  | -         | Treatment | -0.1       | Small   | Female     | 5.0833   | 5.20 | 0.97818  | 543         | 1.000  |
| Control    | -0.1  | Large      | Female  | -         | Treatment | -0.1       | Small   | Male       | -1.3333  | 5.20 | -0.25657 | 543         | 1.000  |
| Control    | -0.1  | Large      | Female  | -         | Treatment | 0.1        | Large   | Female     | -3.5833  | 4.86 | -0.73715 | 543         | 1.000  |
| Control    | -0.1  | Large      | Female  | -         | Treatment | 0.1        | Large   | Male       | -12.8333 | 4.86 | -2.64002 | 543         | 1.000  |
| Control    | -0.1  | Large      | Female  | -         | Treatment | 0.1        | Small   | Female     | 16.8333  | 5.20 | 3.23924  | 543         | 1.000  |
| Control    | -0.1  | Large      | Female  | -         | Treatment | 0.1        | Small   | Male       | -35.2500 | 5.20 | -6.78315 | 543         | < .001 |
| Control    | -0.1  | Large      | Female  | -         | Treatment | 24         | Large   | Female     | -0.8333  | 4.86 | -0.17143 | 543         | 1.000  |
| Control    | -0.1  | Large      | Female  | -         | Treatment | 24         | Large   | Male       | -28.8958 | 4.86 | -5.94434 | 543         | < .001 |
| Control    | -0.1  | Large      | Female  | -         | Treatment | 24         | Small   | Female     | 7.9167   | 5.20 | 1.52340  | 543         | 1.000  |
| Control    | -0.1  | Large      | Female  | -         | Treatment | 24         | Small   | Male       | -14.5000 | 5.20 | -2.79023 | 543         | 1.000  |
| Control    | -0.1  | Large      | Female  | -         | Treatment | 4          | Large   | Female     | 12.2292  | 4.86 | 2.51574  | 543         | 1.000  |
| Control    | -0.1  | Large      | Female  | -         | Treatment | 4          | Large   | Male       | -33.0833 | 4.86 | -6.80578 | 543         | < .001 |
| Control    | -0.1  | Large      | Female  | -         | Treatment | 4          | Small   | Female     | 9.5833   | 5.20 | 1.84412  | 543         | 1.000  |
| Control    | -0.1  | Large      | Female  | -         | Treatment | 4          | Small   | Male       | -12.3333 | 5.20 | -2.37330 | 543         | 1.000  |
| Control    | -0.1  | Large      | Helpers | -         | Control   | -0.1       | Large   | Female     | -7.5211  | 5.19 | -1.44881 | 554         | 1.000  |
| Control    | -0.1  | Large      | Helpers | -         | Control   | -0.1       | Large   | Male       | -10.6045 | 5.19 | -2.04276 | 554         | 1.000  |
| Control    | -0.1  | Large      | Helpers | -         | Control   | -0.1       | Small   | Female     | -3.0211  | 5.20 | -0.58136 | 543         | 1.000  |
| Control    | -0.1  | Large      | Helpers | -         | Control   | -0.1       | Small   | Helpers    | 1.0483   | 5.20 | 0.20173  | 543         | 1.000  |
| Control    | -0.1  | Large      | Helpers | -         | Control   | -0.1       | Small   | Male       | -12.8545 | 5.20 | -2.47358 | 543         | 1.000  |
| Control    | -0.1  | Large      | Helpers | -         | Control   | 0.1        | Large   | Female     | -12.5211 | 5.19 | -2.41198 | 554         | 1.000  |
| Control    | -0.1  | Large      | Helpers | -         | Control   | 0.1        | Large   | Helpers    | 0.9842   | 5.19 | 0.18959  | 554         | 1.000  |
| Control    | -0.1  | Large      | Helpers | -         | Control   | 0.1        | Large   | Male       | -11.7711 | 5.19 | -2.26750 | 554         | 1.000  |
| Control    | -0.1  | Large      | Helpers | -         | Control   | 0.1        | Small   | Female     | -5.6878  | 5.20 | -1.09450 | 543         | 1.000  |
| Control    | -0.1  | Large      | Helpers | -         | Control   | 0.1        | Small   | Helpers    | 3.5414   | 5.20 | 0.68147  | 543         | 1.000  |
| Control    | -0.1  | Large      | Helpers | -         | Control   | 0.1        | Small   | Male       | -19.4378 | 5.20 | -3.74041 | 543         | 0.229  |
| Control    | -0.1  | Large      | Helpers | -         | Control   | 24         | Large   | Female     | -9.6045  | 5.19 | -1.85013 | 554         | 1.000  |
| Control    | -0.1  | Large      | Helpers | -         | Control   | 24         | Large   | Helpers    | -0.1765  | 5.19 | -0.03400 | 554         | 1.000  |
| Control    | -0.1  | Large      | Helpers | -         | Control   | 24         | Large   | Male       | -8.0211  | 5.19 | -1.54513 | 554         | 1.000  |
| Control    | -0.1  | Large      | Helpers | -         | Control   | 24         | Small   | Female     | -3.7711  | 5.20 | -0.72568 | 543         | 1.000  |
| Control    | -0.1  | Large      | Helpers | -         | Control   | 24         | Small   | Helpers    | 1.6108   | 5.20 | 0.30997  | 543         | 1.000  |
| Control    | -0.1  | Large      | Helpers | -         | Control   | 24         | Small   | Male       | -14.1878 | 5.20 | -2.73016 | 543         | 1.000  |
| Control    | -0.1  | Large      | Helpers | -         | Control   | 4          | Large   | Female     | -8.7711  | 5.19 | -1.68960 | 554         | 1.000  |
| Control    | -0.1  | Large      | Helpers | -         | Control   | 4          | Large   | Helpers    | -0.2560  | 5.19 | -0.04930 | 554         | 1.000  |
| Control    | -0.1  | Large      | Helpers | -         | Control   | 4          | Large   | Male       | -8.1045  | 5.19 | -1.56118 | 554         | 1.000  |
| Control    | -0.1  | Large      | Helpers | -         | Control   | 4          | Small   | Female     | -3.8545  | 5.20 | -0.74171 | 543         | 1.000  |
| Control    | -0.1  | Large      | Helpers | -         | Control   | 4          | Small   | Helpers    | 1.2358   | 5.20 | 0.23781  | 543         | 1.000  |
| Control    | -0.1  | Large      | Helpers | -         | Control   | 4          | Small   | Male       | -12.6878 | 5.20 | -2.44151 | 543         | 1.000  |
| Control    | -0.1  | Large      | Helpers | -         | Treatment | -0.1       | Large   | Female     | -11.3545 | 4.86 | -2.33580 | 543         | 1.000  |
| Control    | -0.1  | Large      | Helpers | -         | Treatment | -0.1       | Large   | Helpers    | 1.0228   | 4.86 | 0.21040  | 543         | 1.000  |
| Control    | -0.1  | Large      | Helpers | -         | Treatment | -0.1       | Large   | Male       | -16.9170 | 4.86 | -3.48009 | 543         | 0.611  |
| Control    | -0.1  | Large      | Helpers | -         | Treatment | -0.1       | Small   | Female     | -2.4378  | 5.20 | -0.46910 | 543         | 1.000  |
| Control    | -0.1  | Large      | Helpers | -         | Treatment | -0.1       | Small   | Helpers    | 0.1664   | 5.20 | 0.03201  | 543         | 1.000  |

Post Hoc Comparisons - Treatment \* Hours \* Group Size \* Subject

| Comparison |       |            |         |             |       |            |         |            |      |          |     |             |
|------------|-------|------------|---------|-------------|-------|------------|---------|------------|------|----------|-----|-------------|
| Treatment  | Hours | Group Size | Subject | Treatment   | Hours | Group Size | Subject | Difference | SE   | t        | df  | Pbonferroni |
| Control    | -0.1  | Large      | Helpers | - Treatment | -0.1  | Small      | Male    | -8.8545    | 5.20 | -1.70386 | 543 | 1.000       |
| Control    | -0.1  | Large      | Helpers | - Treatment | 0.1   | Large      | Female  | -11.1045   | 4.86 | -2.28437 | 543 | 1.000       |
| Control    | -0.1  | Large      | Helpers | - Treatment | 0.1   | Large      | Helpers | 1.5213     | 4.86 | 0.31295  | 543 | 1.000       |
| Control    | -0.1  | Large      | Helpers | - Treatment | 0.1   | Large      | Male    | -20.3545   | 4.86 | -4.18724 | 543 | 0.037       |
| Control    | -0.1  | Large      | Helpers | - Treatment | 0.1   | Small      | Female  | 9.3122     | 5.20 | 1.79195  | 543 | 1.000       |
| Control    | -0.1  | Large      | Helpers | - Treatment | 0.1   | Small      | Helpers | 7.0205     | 5.20 | 1.35096  | 543 | 1.000       |
| Control    | -0.1  | Large      | Helpers | - Treatment | 0.1   | Small      | Male    | -42.7711   | 5.20 | -8.23044 | 543 | < .001      |
| Control    | -0.1  | Large      | Helpers | - Treatment | 24    | Large      | Female  | -8.3545    | 4.86 | -1.71865 | 543 | 1.000       |
| Control    | -0.1  | Large      | Helpers | - Treatment | 24    | Large      | Helpers | 3.1169     | 4.86 | 0.64119  | 543 | 1.000       |
| Control    | -0.1  | Large      | Helpers | - Treatment | 24    | Large      | Male    | -36.4170   | 4.86 | -7.49156 | 543 | < .001      |
| Control    | -0.1  | Large      | Helpers | - Treatment | 24    | Small      | Female  | 0.3955     | 5.20 | 0.07611  | 543 | 1.000       |
| Control    | -0.1  | Large      | Helpers | - Treatment | 24    | Small      | Helpers | 4.3955     | 5.20 | 0.84583  | 543 | 1.000       |
| Control    | -0.1  | Large      | Helpers | - Treatment | 24    | Small      | Male    | -22.0211   | 5.20 | -4.23752 | 543 | 0.030       |
| Control    | -0.1  | Large      | Helpers | - Treatment | 4     | Large      | Female  | 4.7080     | 4.86 | 0.96852  | 543 | 1.000       |
| Control    | -0.1  | Large      | Helpers | - Treatment | 4     | Large      | Helpers | 2.0324     | 4.86 | 0.41811  | 543 | 1.000       |
| Control    | -0.1  | Large      | Helpers | - Treatment | 4     | Large      | Male    | -40.6045   | 4.86 | -8.35299 | 543 | < .001      |
| Control    | -0.1  | Large      | Helpers | - Treatment | 4     | Small      | Female  | 2.0622     | 5.20 | 0.39683  | 543 | 1.000       |
| Control    | -0.1  | Large      | Helpers | - Treatment | 4     | Small      | Helpers | 2.7080     | 5.20 | 0.52111  | 543 | 1.000       |
| Control    | -0.1  | Large      | Helpers | - Treatment | 4     | Small      | Male    | -19.8545   | 5.20 | -3.82059 | 543 | 0.168       |
| Control    | -0.1  | Large      | Male    | - Control   | -0.1  | Small      | Male    | -2.2500    | 5.20 | -0.43297 | 543 | 1.000       |
| Control    | -0.1  | Large      | Male    | - Control   | 0.1   | Large      | Male    | -1.1667    | 5.19 | -0.22474 | 554 | 1.000       |
| Control    | -0.1  | Large      | Male    | - Control   | 0.1   | Small      | Male    | -8.8333    | 5.20 | -1.69980 | 543 | 1.000       |
| Control    | -0.1  | Large      | Male    | - Control   | 24    | Large      | Male    | 2.5833     | 5.19 | 0.49763  | 554 | 1.000       |
| Control    | -0.1  | Large      | Male    | - Control   | 24    | Small      | Male    | -3.5833    | 5.20 | -0.68954 | 543 | 1.000       |
| Control    | -0.1  | Large      | Male    | - Control   | 4     | Large      | Male    | 2.5000     | 5.19 | 0.48158  | 554 | 1.000       |
| Control    | -0.1  | Large      | Male    | - Control   | 4     | Small      | Male    | -2.0833    | 5.20 | -0.40090 | 543 | 1.000       |
| Control    | -0.1  | Large      | Male    | - Treatment | -0.1  | Large      | Male    | -6.3125    | 4.86 | -1.29858 | 543 | 1.000       |
| Control    | -0.1  | Large      | Male    | - Treatment | -0.1  | Small      | Male    | 1.7500     | 5.20 | 0.33675  | 543 | 1.000       |
| Control    | -0.1  | Large      | Male    | - Treatment | 0.1   | Large      | Male    | -9.7500    | 4.86 | -2.00573 | 543 | 1.000       |
| Control    | -0.1  | Large      | Male    | - Treatment | 0.1   | Small      | Male    | -32.1667   | 5.20 | -6.18983 | 543 | < .001      |
| Control    | -0.1  | Large      | Male    | - Treatment | 24    | Large      | Male    | -25.8125   | 4.86 | -5.31005 | 543 | < .001      |
| Control    | -0.1  | Large      | Male    | - Treatment | 24    | Small      | Male    | -11.4167   | 5.20 | -2.19691 | 543 | 1.000       |
| Control    | -0.1  | Large      | Male    | - Treatment | 4     | Large      | Male    | -30.0000   | 4.86 | -6.17148 | 543 | < .001      |
| Control    | -0.1  | Large      | Male    | - Treatment | 4     | Small      | Male    | -9.2500    | 5.20 | -1.77998 | 543 | 1.000       |
| Control    | -0.1  | Small      | Female  | - Control   | -0.1  | Large      | Male    | -7.5833    | 5.20 | -1.45926 | 543 | 1.000       |
| Control    | -0.1  | Small      | Female  | - Control   | -0.1  | Small      | Male    | -9.8333    | 5.19 | -1.89422 | 554 | 1.000       |
| Control    | -0.1  | Small      | Female  | - Control   | 0.1   | Large      | Male    | -8.7500    | 5.20 | -1.68376 | 543 | 1.000       |
| Control    | -0.1  | Small      | Female  | - Control   | 0.1   | Small      | Female  | -2.6667    | 5.19 | -0.51369 | 554 | 1.000       |
| Control    | -0.1  | Small      | Female  | - Control   | 0.1   | Small      | Male    | -16.4167   | 5.19 | -3.16238 | 554 | 1.000       |
| Control    | -0.1  | Small      | Female  | - Control   | 24    | Large      | Male    | -5.0000    | 5.20 | -0.96215 | 543 | 1.000       |
| Control    | -0.1  | Small      | Female  | - Control   | 24    | Small      | Female  | -0.7500    | 5.19 | -0.14447 | 554 | 1.000       |
| Control    | -0.1  | Small      | Female  | - Control   | 24    | Small      | Male    | -11.1667   | 5.19 | -2.15106 | 554 | 1.000       |
| Control    | -0.1  | Small      | Female  | - Control   | 4     | Large      | Male    | -5.0833    | 5.20 | -0.97818 | 543 | 1.000       |
| Control    | -0.1  | Small      | Female  | - Control   | 4     | Small      | Female  | -0.8333    | 5.19 | -0.16053 | 554 | 1.000       |
| Control    | -0.1  | Small      | Female  | - Control   | 4     | Small      | Male    | -9.6667    | 5.19 | -1.86211 | 554 | 1.000       |
| Control    | -0.1  | Small      | Female  | - Treatment | -0.1  | Large      | Male    | -13.8958   | 4.86 | -2.85860 | 543 | 1.000       |
| Control    | -0.1  | Small      | Female  | - Treatment | -0.1  | Small      | Female  | 0.5833     | 5.20 | 0.11225  | 543 | 1.000       |
| Control    | -0.1  | Small      | Female  | - Treatment | -0.1  | Small      | Male    | -5.8333    | 5.20 | -1.12251 | 543 | 1.000       |
| Control    | -0.1  | Small      | Female  | - Treatment | 0.1   | Large      | Male    | -17.3333   | 4.86 | -3.56575 | 543 | 0.445       |
| Control    | -0.1  | Small      | Female  | - Treatment | 0.1   | Small      | Female  | 12.3333    | 5.20 | 2.37330  | 543 | 1.000       |
| Control    | -0.1  | Small      | Female  | - Treatment | 0.1   | Small      | Male    | -39.7500   | 5.20 | -7.64909 | 543 | < .001      |
| Control    | -0.1  | Small      | Female  | - Treatment | 24    | Large      | Male    | -33.3958   | 4.86 | -6.87006 | 543 | < .001      |
| Control    | -0.1  | Small      | Female  | - Treatment | 24    | Small      | Female  | 3.4167     | 5.20 | 0.65747  | 543 | 1.000       |
| Control    | -0.1  | Small      | Female  | - Treatment | 24    | Small      | Male    | -19.0000   | 5.20 | -3.65617 | 543 | 0.317       |
| Control    | -0.1  | Small      | Female  | - Treatment | 4     | Large      | Male    | -37.5833   | 4.86 | -7.73150 | 543 | < .001      |
| Control    | -0.1  | Small      | Female  | - Treatment | 4     | Small      | Female  | 5.0833     | 5.20 | 0.97818  | 543 | 1.000       |
| Control    | -0.1  | Small      | Female  | - Treatment | 4     | Small      | Male    | -16.8333   | 5.20 | -3.23924 | 543 | 1.000       |
| Control    | -0.1  | Small      | Helpers | - Control   | -0.1  | Large      | Female  | -8.5694    | 5.20 | -1.64902 | 543 | 1.000       |
| Control    | -0.1  | Small      | Helpers | - Control   | -0.1  | Large      | Male    | -11.6528   | 5.20 | -2.24234 | 543 | 1.000       |
| Control    | -0.1  | Small      | Helpers | - Control   | -0.1  | Small      | Female  | -4.0694    | 5.19 | -0.78391 | 554 | 1.000       |

## Post Hoc Comparisons - Treatment \* Hours \* Group Size \* Subject

| Comparison |       |            |         |             |       |            |         |            |      |          |     |             |
|------------|-------|------------|---------|-------------|-------|------------|---------|------------|------|----------|-----|-------------|
| Treatment  | Hours | Group Size | Subject | Treatment   | Hours | Group Size | Subject | Difference | SE   | t        | df  | Pbonferroni |
| Control    | -0.1  | Small      | Helpers | - Control   | -0.1  | Small      | Male    | -13.9028   | 5.19 | -2.67813 | 554 | 1.000       |
| Control    | -0.1  | Small      | Helpers | - Control   | 0.1   | Large      | Female  | -13.5694   | 5.20 | -2.61117 | 543 | 1.000       |
| Control    | -0.1  | Small      | Helpers | - Control   | 0.1   | Large      | Male    | -12.8194   | 5.20 | -2.46684 | 543 | 1.000       |
| Control    | -0.1  | Small      | Helpers | - Control   | 0.1   | Small      | Female  | -6.7361    | 5.19 | -1.29759 | 554 | 1.000       |
| Control    | -0.1  | Small      | Helpers | - Control   | 0.1   | Small      | Helpers | 2.4931     | 5.19 | 0.48024  | 554 | 1.000       |
| Control    | -0.1  | Small      | Helpers | - Control   | 0.1   | Small      | Male    | -20.4861   | 5.19 | -3.94629 | 554 | 0.101       |
| Control    | -0.1  | Small      | Helpers | - Control   | 24    | Large      | Female  | -10.6528   | 5.20 | -2.04991 | 543 | 1.000       |
| Control    | -0.1  | Small      | Helpers | - Control   | 24    | Large      | Male    | -9.0694    | 5.20 | -1.74523 | 543 | 1.000       |
| Control    | -0.1  | Small      | Helpers | - Control   | 24    | Small      | Female  | -4.8194    | 5.19 | -0.92838 | 554 | 1.000       |
| Control    | -0.1  | Small      | Helpers | - Control   | 24    | Small      | Helpers | 0.5625     | 5.19 | 0.10836  | 554 | 1.000       |
| Control    | -0.1  | Small      | Helpers | - Control   | 24    | Small      | Male    | -15.2361   | 5.19 | -2.93497 | 554 | 1.000       |
| Control    | -0.1  | Small      | Helpers | - Control   | 4     | Large      | Female  | -9.8194    | 5.20 | -1.88955 | 543 | 1.000       |
| Control    | -0.1  | Small      | Helpers | - Control   | 4     | Large      | Male    | -9.1528    | 5.20 | -1.76127 | 543 | 1.000       |
| Control    | -0.1  | Small      | Helpers | - Control   | 4     | Small      | Female  | -4.9028    | 5.19 | -0.94443 | 554 | 1.000       |
| Control    | -0.1  | Small      | Helpers | - Control   | 4     | Small      | Helpers | 0.1875     | 5.19 | 0.03612  | 554 | 1.000       |
| Control    | -0.1  | Small      | Helpers | - Control   | 4     | Small      | Male    | -13.7361   | 5.19 | -2.64602 | 554 | 1.000       |
| Control    | -0.1  | Small      | Helpers | - Treatment | -0.1  | Large      | Female  | -12.4028   | 4.86 | -2.55145 | 543 | 1.000       |
| Control    | -0.1  | Small      | Helpers | - Treatment | -0.1  | Large      | Male    | -17.9653   | 4.86 | -3.69575 | 543 | 0.272       |
| Control    | -0.1  | Small      | Helpers | - Treatment | -0.1  | Small      | Female  | -3.4861    | 5.20 | -0.67083 | 543 | 1.000       |
| Control    | -0.1  | Small      | Helpers | - Treatment | -0.1  | Small      | Helpers | -0.8819    | 5.20 | -0.16971 | 543 | 1.000       |
| Control    | -0.1  | Small      | Helpers | - Treatment | -0.1  | Small      | Male    | -9.9028    | 5.20 | -1.90559 | 543 | 1.000       |
| Control    | -0.1  | Small      | Helpers | - Treatment | 0.1   | Large      | Female  | -12.1528   | 4.86 | -2.50002 | 543 | 1.000       |
| Control    | -0.1  | Small      | Helpers | - Treatment | 0.1   | Large      | Male    | -21.4028   | 4.86 | -4.40290 | 543 | 0.015       |
| Control    | -0.1  | Small      | Helpers | - Treatment | 0.1   | Small      | Female  | 8.2639     | 5.20 | 1.59022  | 543 | 1.000       |
| Control    | -0.1  | Small      | Helpers | - Treatment | 0.1   | Small      | Helpers | 5.9722     | 5.20 | 1.14923  | 543 | 1.000       |
| Control    | -0.1  | Small      | Helpers | - Treatment | 0.1   | Small      | Male    | -43.8194   | 5.20 | -8.43217 | 543 | < .001      |
| Control    | -0.1  | Small      | Helpers | - Treatment | 24    | Large      | Female  | -9.4028    | 4.86 | -1.93430 | 543 | 1.000       |
| Control    | -0.1  | Small      | Helpers | - Treatment | 24    | Large      | Male    | -37.4653   | 4.86 | -7.70721 | 543 | < .001      |
| Control    | -0.1  | Small      | Helpers | - Treatment | 24    | Small      | Female  | -0.6528    | 5.20 | -0.12561 | 543 | 1.000       |
| Control    | -0.1  | Small      | Helpers | - Treatment | 24    | Small      | Helpers | 3.3472     | 5.20 | 0.64411  | 543 | 1.000       |
| Control    | -0.1  | Small      | Helpers | - Treatment | 24    | Small      | Male    | -23.0694   | 5.20 | -4.43925 | 543 | 0.012       |
| Control    | -0.1  | Small      | Helpers | - Treatment | 4     | Large      | Female  | 3.6597     | 4.86 | 0.75286  | 543 | 1.000       |
| Control    | -0.1  | Small      | Helpers | - Treatment | 4     | Large      | Male    | -41.6528   | 4.86 | -8.56865 | 543 | < .001      |
| Control    | -0.1  | Small      | Helpers | - Treatment | 4     | Small      | Female  | 1.0139     | 5.20 | 0.19510  | 543 | 1.000       |
| Control    | -0.1  | Small      | Helpers | - Treatment | 4     | Small      | Helpers | 1.6597     | 5.20 | 0.31938  | 543 | 1.000       |
| Control    | -0.1  | Small      | Helpers | - Treatment | 4     | Small      | Male    | -20.9028   | 5.20 | -4.02232 | 543 | 0.074       |
| Control    | -0.1  | Small      | Male    | - Control   | 0.1   | Small      | Male    | -6.5833    | 5.19 | -1.26816 | 554 | 1.000       |
| Control    | -0.1  | Small      | Male    | - Control   | 24    | Small      | Male    | -1.3333    | 5.19 | -0.25684 | 554 | 1.000       |
| Control    | -0.1  | Small      | Male    | - Control   | 4     | Small      | Male    | 0.1667     | 5.19 | 0.03211  | 554 | 1.000       |
| Control    | -0.1  | Small      | Male    | - Treatment | -0.1  | Small      | Male    | 4.0000     | 5.20 | 0.76972  | 543 | 1.000       |
| Control    | -0.1  | Small      | Male    | - Treatment | 0.1   | Small      | Male    | -29.9167   | 5.20 | -5.75686 | 543 | < .001      |
| Control    | -0.1  | Small      | Male    | - Treatment | 24    | Small      | Male    | -9.1667    | 5.20 | -1.76394 | 543 | 1.000       |
| Control    | -0.1  | Small      | Male    | - Treatment | 4     | Small      | Male    | -7.0000    | 5.20 | -1.34701 | 543 | 1.000       |
| Control    | 0.1   | Large      | Female  | - Control   | -0.1  | Large      | Male    | 1.9167     | 5.19 | 0.36921  | 554 | 1.000       |
| Control    | 0.1   | Large      | Female  | - Control   | -0.1  | Small      | Female  | 9.5000     | 5.20 | 1.82808  | 543 | 1.000       |
| Control    | 0.1   | Large      | Female  | - Control   | -0.1  | Small      | Male    | -0.3333    | 5.20 | -0.06414 | 543 | 1.000       |
| Control    | 0.1   | Large      | Female  | - Control   | 0.1   | Large      | Male    | 0.7500     | 5.19 | 0.14447  | 554 | 1.000       |
| Control    | 0.1   | Large      | Female  | - Control   | 0.1   | Small      | Female  | 6.8333     | 5.20 | 1.31494  | 543 | 1.000       |
| Control    | 0.1   | Large      | Female  | - Control   | 0.1   | Small      | Male    | -6.9167    | 5.20 | -1.33097 | 543 | 1.000       |
| Control    | 0.1   | Large      | Female  | - Control   | 24    | Large      | Female  | 2.9167     | 5.19 | 0.56184  | 554 | 1.000       |
| Control    | 0.1   | Large      | Female  | - Control   | 24    | Large      | Male    | 4.5000     | 5.19 | 0.86685  | 554 | 1.000       |
| Control    | 0.1   | Large      | Female  | - Control   | 24    | Small      | Female  | 8.7500     | 5.20 | 1.68376  | 543 | 1.000       |
| Control    | 0.1   | Large      | Female  | - Control   | 24    | Small      | Male    | -1.6667    | 5.20 | -0.32072 | 543 | 1.000       |
| Control    | 0.1   | Large      | Female  | - Control   | 4     | Large      | Female  | 3.7500     | 5.19 | 0.72237  | 554 | 1.000       |
| Control    | 0.1   | Large      | Female  | - Control   | 4     | Large      | Male    | 4.4167     | 5.19 | 0.85079  | 554 | 1.000       |
| Control    | 0.1   | Large      | Female  | - Control   | 4     | Small      | Female  | 8.6667     | 5.20 | 1.66773  | 543 | 1.000       |
| Control    | 0.1   | Large      | Female  | - Control   | 4     | Small      | Male    | -0.1667    | 5.20 | -0.03207 | 543 | 1.000       |
| Control    | 0.1   | Large      | Female  | - Treatment | -0.1  | Large      | Male    | -4.3958    | 4.86 | -0.90429 | 543 | 1.000       |
| Control    | 0.1   | Large      | Female  | - Treatment | -0.1  | Small      | Female  | 10.0833    | 5.20 | 1.94033  | 543 | 1.000       |
| Control    | 0.1   | Large      | Female  | - Treatment | -0.1  | Small      | Male    | 3.6667     | 5.20 | 0.70558  | 543 | 1.000       |

Post Hoc Comparisons - Treatment \* Hours \* Group Size \* Subject

| Comparison |       |            |         |             |       |            |         |            |      |          |     |             |
|------------|-------|------------|---------|-------------|-------|------------|---------|------------|------|----------|-----|-------------|
| Treatment  | Hours | Group Size | Subject | Treatment   | Hours | Group Size | Subject | Difference | SE   | t        | df  | Pbonferroni |
| Control    | 0.1   | Large      | Female  | - Treatment | 0.1   | Large      | Female  | 1.4167     | 4.86 | 0.29143  | 543 | 1.000       |
| Control    | 0.1   | Large      | Female  | - Treatment | 0.1   | Large      | Male    | -7.8333    | 4.86 | -1.61144 | 543 | 1.000       |
| Control    | 0.1   | Large      | Female  | - Treatment | 0.1   | Small      | Female  | 21.8333    | 5.20 | 4.20138  | 543 | 0.035       |
| Control    | 0.1   | Large      | Female  | - Treatment | 0.1   | Small      | Male    | -30.2500   | 5.20 | -5.82100 | 543 | < .001      |
| Control    | 0.1   | Large      | Female  | - Treatment | 24    | Large      | Female  | 4.1667     | 4.86 | 0.85715  | 543 | 1.000       |
| Control    | 0.1   | Large      | Female  | - Treatment | 24    | Large      | Male    | -23.8958   | 4.86 | -4.91576 | 543 | 0.001       |
| Control    | 0.1   | Large      | Female  | - Treatment | 24    | Small      | Female  | 12.9167    | 5.20 | 2.48555  | 543 | 1.000       |
| Control    | 0.1   | Large      | Female  | - Treatment | 24    | Small      | Male    | -9.5000    | 5.20 | -1.82808 | 543 | 1.000       |
| Control    | 0.1   | Large      | Female  | - Treatment | 4     | Large      | Female  | 17.2292    | 4.86 | 3.54432  | 543 | 0.482       |
| Control    | 0.1   | Large      | Female  | - Treatment | 4     | Large      | Male    | -28.0833   | 4.86 | -5.77719 | 543 | < .001      |
| Control    | 0.1   | Large      | Female  | - Treatment | 4     | Small      | Female  | 14.5833    | 5.20 | 2.80627  | 543 | 1.000       |
| Control    | 0.1   | Large      | Female  | - Treatment | 4     | Small      | Male    | -7.3333    | 5.20 | -1.41115 | 543 | 1.000       |
| Control    | 0.1   | Large      | Helpers | - Control   | -0.1  | Large      | Female  | -8.5054    | 5.19 | -1.63841 | 554 | 1.000       |
| Control    | 0.1   | Large      | Helpers | - Control   | -0.1  | Large      | Male    | -11.5887   | 5.19 | -2.23236 | 554 | 1.000       |
| Control    | 0.1   | Large      | Helpers | - Control   | -0.1  | Small      | Female  | -4.0054    | 5.20 | -0.77075 | 543 | 1.000       |
| Control    | 0.1   | Large      | Helpers | - Control   | -0.1  | Small      | Helpers | 0.0641     | 5.20 | 0.01233  | 543 | 1.000       |
| Control    | 0.1   | Large      | Helpers | - Control   | -0.1  | Small      | Male    | -13.8387   | 5.20 | -2.66298 | 543 | 1.000       |
| Control    | 0.1   | Large      | Helpers | - Control   | 0.1   | Large      | Female  | -13.5054   | 5.19 | -2.60157 | 554 | 1.000       |
| Control    | 0.1   | Large      | Helpers | - Control   | 0.1   | Large      | Male    | -12.7554   | 5.19 | -2.45709 | 554 | 1.000       |
| Control    | 0.1   | Large      | Helpers | - Control   | 0.1   | Small      | Female  | -6.6720    | 5.20 | -1.28390 | 543 | 1.000       |
| Control    | 0.1   | Large      | Helpers | - Control   | 0.1   | Small      | Helpers | 2.5571     | 5.20 | 0.49207  | 543 | 1.000       |
| Control    | 0.1   | Large      | Helpers | - Control   | 0.1   | Small      | Male    | -20.4220   | 5.20 | -3.92981 | 543 | 0.108       |
| Control    | 0.1   | Large      | Helpers | - Control   | 24    | Large      | Female  | -10.5887   | 5.19 | -2.03972 | 554 | 1.000       |
| Control    | 0.1   | Large      | Helpers | - Control   | 24    | Large      | Helpers | -1.1607    | 5.19 | -0.22359 | 554 | 1.000       |
| Control    | 0.1   | Large      | Helpers | - Control   | 24    | Large      | Male    | -9.0054    | 5.19 | -1.73472 | 554 | 1.000       |
| Control    | 0.1   | Large      | Helpers | - Control   | 24    | Small      | Female  | -4.7554    | 5.20 | -0.91507 | 543 | 1.000       |
| Control    | 0.1   | Large      | Helpers | - Control   | 24    | Small      | Helpers | 0.6266     | 5.20 | 0.12057  | 543 | 1.000       |
| Control    | 0.1   | Large      | Helpers | - Control   | 24    | Small      | Male    | -15.1720   | 5.20 | -2.91955 | 543 | 1.000       |
| Control    | 0.1   | Large      | Helpers | - Control   | 4     | Large      | Female  | -9.7554    | 5.19 | -1.87920 | 554 | 1.000       |
| Control    | 0.1   | Large      | Helpers | - Control   | 4     | Large      | Helpers | -1.2402    | 5.19 | -0.23890 | 554 | 1.000       |
| Control    | 0.1   | Large      | Helpers | - Control   | 4     | Large      | Male    | -9.0887    | 5.19 | -1.75078 | 554 | 1.000       |
| Control    | 0.1   | Large      | Helpers | - Control   | 4     | Small      | Female  | -4.8387    | 5.20 | -0.93111 | 543 | 1.000       |
| Control    | 0.1   | Large      | Helpers | - Control   | 4     | Small      | Helpers | 0.2516     | 5.20 | 0.04841  | 543 | 1.000       |
| Control    | 0.1   | Large      | Helpers | - Control   | 4     | Small      | Male    | -13.6720   | 5.20 | -2.63091 | 543 | 1.000       |
| Control    | 0.1   | Large      | Helpers | - Treatment | -0.1  | Large      | Female  | -12.3387   | 4.86 | -2.53827 | 543 | 1.000       |
| Control    | 0.1   | Large      | Helpers | - Treatment | -0.1  | Large      | Male    | -17.9012   | 4.86 | -3.68256 | 543 | 0.286       |
| Control    | 0.1   | Large      | Helpers | - Treatment | -0.1  | Small      | Female  | -3.4220    | 5.20 | -0.65850 | 543 | 1.000       |
| Control    | 0.1   | Large      | Helpers | - Treatment | -0.1  | Small      | Helpers | -0.8179    | 5.20 | -0.15738 | 543 | 1.000       |
| Control    | 0.1   | Large      | Helpers | - Treatment | -0.1  | Small      | Male    | -9.8387    | 5.20 | -1.89326 | 543 | 1.000       |
| Control    | 0.1   | Large      | Helpers | - Treatment | 0.1   | Large      | Female  | -12.0887   | 4.86 | -2.48684 | 543 | 1.000       |
| Control    | 0.1   | Large      | Helpers | - Treatment | 0.1   | Large      | Helpers | 0.5371     | 4.86 | 0.11048  | 543 | 1.000       |
| Control    | 0.1   | Large      | Helpers | - Treatment | 0.1   | Large      | Male    | -21.3387   | 4.86 | -4.38971 | 543 | 0.015       |
| Control    | 0.1   | Large      | Helpers | - Treatment | 0.1   | Small      | Female  | 8.3280     | 5.20 | 1.60255  | 543 | 1.000       |
| Control    | 0.1   | Large      | Helpers | - Treatment | 0.1   | Small      | Helpers | 6.0363     | 5.20 | 1.16157  | 543 | 1.000       |
| Control    | 0.1   | Large      | Helpers | - Treatment | 0.1   | Small      | Male    | -43.7554   | 5.20 | -8.41984 | 543 | < .001      |
| Control    | 0.1   | Large      | Helpers | - Treatment | 24    | Large      | Female  | -9.3387    | 4.86 | -1.92112 | 543 | 1.000       |
| Control    | 0.1   | Large      | Helpers | - Treatment | 24    | Large      | Helpers | 2.1327     | 4.86 | 0.43872  | 543 | 1.000       |
| Control    | 0.1   | Large      | Helpers | - Treatment | 24    | Large      | Male    | -37.4012   | 4.86 | -7.69403 | 543 | < .001      |
| Control    | 0.1   | Large      | Helpers | - Treatment | 24    | Small      | Female  | -0.5887    | 5.20 | -0.11328 | 543 | 1.000       |
| Control    | 0.1   | Large      | Helpers | - Treatment | 24    | Small      | Helpers | 3.4113     | 5.20 | 0.65644  | 543 | 1.000       |
| Control    | 0.1   | Large      | Helpers | - Treatment | 24    | Small      | Male    | -23.0054   | 5.20 | -4.42692 | 543 | 0.013       |
| Control    | 0.1   | Large      | Helpers | - Treatment | 4     | Large      | Female  | 3.7238     | 4.86 | 0.76605  | 543 | 1.000       |
| Control    | 0.1   | Large      | Helpers | - Treatment | 4     | Large      | Helpers | 1.0482     | 4.86 | 0.21563  | 543 | 1.000       |
| Control    | 0.1   | Large      | Helpers | - Treatment | 4     | Large      | Male    | -41.5887   | 4.86 | -8.55546 | 543 | < .001      |
| Control    | 0.1   | Large      | Helpers | - Treatment | 4     | Small      | Female  | 1.0780     | 5.20 | 0.20743  | 543 | 1.000       |
| Control    | 0.1   | Large      | Helpers | - Treatment | 4     | Small      | Helpers | 1.7238     | 5.20 | 0.33171  | 543 | 1.000       |
| Control    | 0.1   | Large      | Helpers | - Treatment | 4     | Small      | Male    | -20.8387   | 5.20 | -4.00999 | 543 | 0.078       |
| Control    | 0.1   | Large      | Male    | - Control   | -0.1  | Small      | Male    | -1.0833    | 5.20 | -0.20847 | 543 | 1.000       |
| Control    | 0.1   | Large      | Male    | - Control   | 0.1   | Small      | Male    | -7.6667    | 5.20 | -1.47530 | 543 | 1.000       |
| Control    | 0.1   | Large      | Male    | - Control   | 24    | Large      | Male    | 3.7500     | 5.19 | 0.72237  | 554 | 1.000       |

Post Hoc Comparisons - Treatment \* Hours \* Group Size \* Subject

| Comparison |       |            |         |             |       |            |         |            |      |          |     |             |
|------------|-------|------------|---------|-------------|-------|------------|---------|------------|------|----------|-----|-------------|
| Treatment  | Hours | Group Size | Subject | Treatment   | Hours | Group Size | Subject | Difference | SE   | t        | df  | Pbonferroni |
| Control    | 0.1   | Large      | Male    | - Control   | 24    | Small      | Male    | -2.4167    | 5.20 | -0.46504 | 543 | 1.000       |
| Control    | 0.1   | Large      | Male    | - Control   | 4     | Large      | Male    | 3.6667     | 5.19 | 0.70632  | 554 | 1.000       |
| Control    | 0.1   | Large      | Male    | - Control   | 4     | Small      | Male    | -0.9167    | 5.20 | -0.17639 | 543 | 1.000       |
| Control    | 0.1   | Large      | Male    | - Treatment | -0.1  | Small      | Male    | 2.9167     | 5.20 | 0.56125  | 543 | 1.000       |
| Control    | 0.1   | Large      | Male    | - Treatment | 0.1   | Large      | Male    | -8.5833    | 4.86 | -1.76573 | 543 | 1.000       |
| Control    | 0.1   | Large      | Male    | - Treatment | 0.1   | Small      | Male    | -31.0000   | 5.20 | -5.96532 | 543 | < .001      |
| Control    | 0.1   | Large      | Male    | - Treatment | 24    | Large      | Male    | -24.6458   | 4.86 | -5.07005 | 543 | < .001      |
| Control    | 0.1   | Large      | Male    | - Treatment | 24    | Small      | Male    | -10.2500   | 5.20 | -1.97241 | 543 | 1.000       |
| Control    | 0.1   | Large      | Male    | - Treatment | 4     | Large      | Male    | -28.8333   | 4.86 | -5.93148 | 543 | < .001      |
| Control    | 0.1   | Large      | Male    | - Treatment | 4     | Small      | Male    | -8.0833    | 5.20 | -1.55547 | 543 | 1.000       |
| Control    | 0.1   | Small      | Female  | - Control   | -0.1  | Large      | Male    | -4.9167    | 5.20 | -0.94611 | 543 | 1.000       |
| Control    | 0.1   | Small      | Female  | - Control   | -0.1  | Small      | Male    | -7.1667    | 5.19 | -1.38053 | 554 | 1.000       |
| Control    | 0.1   | Small      | Female  | - Control   | 0.1   | Large      | Male    | -6.0833    | 5.20 | -1.17061 | 543 | 1.000       |
| Control    | 0.1   | Small      | Female  | - Control   | 0.1   | Small      | Male    | -13.7500   | 5.19 | -2.64870 | 554 | 1.000       |
| Control    | 0.1   | Small      | Female  | - Control   | 24    | Large      | Male    | -2.3333    | 5.20 | -0.44900 | 543 | 1.000       |
| Control    | 0.1   | Small      | Female  | - Control   | 24    | Small      | Female  | 1.9167     | 5.19 | 0.36921  | 554 | 1.000       |
| Control    | 0.1   | Small      | Female  | - Control   | 24    | Small      | Male    | -8.5000    | 5.19 | -1.63738 | 554 | 1.000       |
| Control    | 0.1   | Small      | Female  | - Control   | 4     | Large      | Male    | -2.4167    | 5.20 | -0.46504 | 543 | 1.000       |
| Control    | 0.1   | Small      | Female  | - Control   | 4     | Small      | Female  | 1.8333     | 5.19 | 0.35316  | 554 | 1.000       |
| Control    | 0.1   | Small      | Female  | - Control   | 4     | Small      | Male    | -7.0000    | 5.19 | -1.34843 | 554 | 1.000       |
| Control    | 0.1   | Small      | Female  | - Treatment | -0.1  | Large      | Male    | -11.2292   | 4.86 | -2.31002 | 543 | 1.000       |
| Control    | 0.1   | Small      | Female  | - Treatment | -0.1  | Small      | Male    | -3.1667    | 5.20 | -0.60936 | 543 | 1.000       |
| Control    | 0.1   | Small      | Female  | - Treatment | 0.1   | Large      | Male    | -14.6667   | 4.86 | -3.01717 | 543 | 1.000       |
| Control    | 0.1   | Small      | Female  | - Treatment | 0.1   | Small      | Female  | 15.0000    | 5.20 | 2.88645  | 543 | 1.000       |
| Control    | 0.1   | Small      | Female  | - Treatment | 0.1   | Small      | Male    | -37.0833   | 5.20 | -7.13594 | 543 | < .001      |
| Control    | 0.1   | Small      | Female  | - Treatment | 24    | Large      | Male    | -30.7292   | 4.86 | -6.32149 | 543 | < .001      |
| Control    | 0.1   | Small      | Female  | - Treatment | 24    | Small      | Female  | 6.0833     | 5.20 | 1.17061  | 543 | 1.000       |
| Control    | 0.1   | Small      | Female  | - Treatment | 24    | Small      | Male    | -16.3333   | 5.20 | -3.14302 | 543 | 1.000       |
| Control    | 0.1   | Small      | Female  | - Treatment | 4     | Large      | Male    | -34.9167   | 4.86 | -7.18292 | 543 | < .001      |
| Control    | 0.1   | Small      | Female  | - Treatment | 4     | Small      | Female  | 7.7500     | 5.20 | 1.49133  | 543 | 1.000       |
| Control    | 0.1   | Small      | Female  | - Treatment | 4     | Small      | Male    | -14.1667   | 5.20 | -2.72609 | 543 | 1.000       |
| Control    | 0.1   | Small      | Helpers | - Control   | -0.1  | Large      | Female  | -11.0625   | 5.20 | -2.12875 | 543 | 1.000       |
| Control    | 0.1   | Small      | Helpers | - Control   | -0.1  | Large      | Male    | -14.1458   | 5.20 | -2.72208 | 543 | 1.000       |
| Control    | 0.1   | Small      | Helpers | - Control   | -0.1  | Small      | Female  | -6.5625    | 5.19 | -1.26415 | 554 | 1.000       |
| Control    | 0.1   | Small      | Helpers | - Control   | -0.1  | Small      | Male    | -16.3958   | 5.19 | -3.15837 | 554 | 1.000       |
| Control    | 0.1   | Small      | Helpers | - Control   | 0.1   | Large      | Female  | -16.0625   | 5.20 | -3.09090 | 543 | 1.000       |
| Control    | 0.1   | Small      | Helpers | - Control   | 0.1   | Large      | Male    | -15.3125   | 5.20 | -2.94658 | 543 | 1.000       |
| Control    | 0.1   | Small      | Helpers | - Control   | 0.1   | Small      | Female  | -9.2292    | 5.19 | -1.77784 | 554 | 1.000       |
| Control    | 0.1   | Small      | Helpers | - Control   | 0.1   | Small      | Male    | -22.9792   | 5.19 | -4.42653 | 554 | 0.013       |
| Control    | 0.1   | Small      | Helpers | - Control   | 24    | Large      | Female  | -13.1458   | 5.20 | -2.52965 | 543 | 1.000       |
| Control    | 0.1   | Small      | Helpers | - Control   | 24    | Large      | Male    | -11.5625   | 5.20 | -2.22497 | 543 | 1.000       |
| Control    | 0.1   | Small      | Helpers | - Control   | 24    | Small      | Female  | -7.3125    | 5.19 | -1.40862 | 554 | 1.000       |
| Control    | 0.1   | Small      | Helpers | - Control   | 24    | Small      | Helpers | -1.9306    | 5.19 | -0.37189 | 554 | 1.000       |
| Control    | 0.1   | Small      | Helpers | - Control   | 24    | Small      | Male    | -17.7292   | 5.19 | -3.41521 | 554 | 0.772       |
| Control    | 0.1   | Small      | Helpers | - Control   | 4     | Large      | Female  | -12.3125   | 5.20 | -2.36929 | 543 | 1.000       |
| Control    | 0.1   | Small      | Helpers | - Control   | 4     | Large      | Male    | -11.6458   | 5.20 | -2.24101 | 543 | 1.000       |
| Control    | 0.1   | Small      | Helpers | - Control   | 4     | Small      | Female  | -7.3958    | 5.19 | -1.42468 | 554 | 1.000       |
| Control    | 0.1   | Small      | Helpers | - Control   | 4     | Small      | Helpers | -2.3056    | 5.19 | -0.44412 | 554 | 1.000       |
| Control    | 0.1   | Small      | Helpers | - Control   | 4     | Small      | Male    | -16.2292   | 5.19 | -3.12626 | 554 | 1.000       |
| Control    | 0.1   | Small      | Helpers | - Treatment | -0.1  | Large      | Female  | -14.8958   | 4.86 | -3.06431 | 543 | 1.000       |
| Control    | 0.1   | Small      | Helpers | - Treatment | -0.1  | Large      | Male    | -20.4583   | 4.86 | -4.20861 | 543 | 0.034       |
| Control    | 0.1   | Small      | Helpers | - Treatment | -0.1  | Small      | Female  | -5.9792    | 5.20 | -1.15057 | 543 | 1.000       |
| Control    | 0.1   | Small      | Helpers | - Treatment | -0.1  | Small      | Male    | -12.3958   | 5.20 | -2.38533 | 543 | 1.000       |
| Control    | 0.1   | Small      | Helpers | - Treatment | 0.1   | Large      | Female  | -14.6458   | 4.86 | -3.01288 | 543 | 1.000       |
| Control    | 0.1   | Small      | Helpers | - Treatment | 0.1   | Large      | Male    | -23.8958   | 4.86 | -4.91576 | 543 | 0.001       |
| Control    | 0.1   | Small      | Helpers | - Treatment | 0.1   | Small      | Female  | 5.7708     | 5.20 | 1.11048  | 543 | 1.000       |
| Control    | 0.1   | Small      | Helpers | - Treatment | 0.1   | Small      | Helpers | 3.4792     | 5.20 | 0.66950  | 543 | 1.000       |
| Control    | 0.1   | Small      | Helpers | - Treatment | 0.1   | Small      | Male    | -46.3125   | 5.20 | -8.91191 | 543 | < .001      |
| Control    | 0.1   | Small      | Helpers | - Treatment | 24    | Large      | Female  | -11.8958   | 4.86 | -2.44716 | 543 | 1.000       |
| Control    | 0.1   | Small      | Helpers | - Treatment | 24    | Large      | Male    | -39.9583   | 4.86 | -8.22007 | 543 | < .001      |

Post Hoc Comparisons - Treatment \* Hours \* Group Size \* Subject

| Comparison |       |            |         |             |       |            |         |            |      |          |     |             |
|------------|-------|------------|---------|-------------|-------|------------|---------|------------|------|----------|-----|-------------|
| Treatment  | Hours | Group Size | Subject | Treatment   | Hours | Group Size | Subject | Difference | SE   | t        | df  | Pbonferroni |
| Control    | 0.1   | Small      | Helpers | - Treatment | 24    | Small      | Female  | -3.1458    | 5.20 | -0.60535 | 543 | 1.000       |
| Control    | 0.1   | Small      | Helpers | - Treatment | 24    | Small      | Helpers | 0.8542     | 5.20 | 0.16437  | 543 | 1.000       |
| Control    | 0.1   | Small      | Helpers | - Treatment | 24    | Small      | Male    | -25.5625   | 5.20 | -4.91899 | 543 | 0.001       |
| Control    | 0.1   | Small      | Helpers | - Treatment | 4     | Large      | Female  | 1.1667     | 4.86 | 0.24000  | 543 | 1.000       |
| Control    | 0.1   | Small      | Helpers | - Treatment | 4     | Large      | Male    | -44.1458   | 4.86 | -9.08151 | 543 | < .001      |
| Control    | 0.1   | Small      | Helpers | - Treatment | 4     | Small      | Female  | -1.4792    | 5.20 | -0.28464 | 543 | 1.000       |
| Control    | 0.1   | Small      | Helpers | - Treatment | 4     | Small      | Helpers | -0.8333    | 5.20 | -0.16036 | 543 | 1.000       |
| Control    | 0.1   | Small      | Helpers | - Treatment | 4     | Small      | Male    | -23.3958   | 5.20 | -4.50206 | 543 | 0.009       |
| Control    | 0.1   | Small      | Male    | - Control   | 24    | Small      | Male    | 5.2500     | 5.19 | 1.01132  | 554 | 1.000       |
| Control    | 0.1   | Small      | Male    | - Control   | 4     | Small      | Male    | 6.7500     | 5.19 | 1.30027  | 554 | 1.000       |
| Control    | 0.1   | Small      | Male    | - Treatment | 0.1   | Small      | Male    | -23.3333   | 5.20 | -4.49003 | 543 | 0.010       |
| Control    | 0.1   | Small      | Male    | - Treatment | 24    | Small      | Male    | -2.5833    | 5.20 | -0.49711 | 543 | 1.000       |
| Control    | 0.1   | Small      | Male    | - Treatment | 4     | Small      | Male    | -0.4167    | 5.20 | -0.08018 | 543 | 1.000       |
| Control    | 24    | Large      | Female  | - Control   | -0.1  | Large      | Male    | -1.0000    | 5.19 | -0.19263 | 554 | 1.000       |
| Control    | 24    | Large      | Female  | - Control   | -0.1  | Small      | Female  | 6.5833     | 5.20 | 1.26683  | 543 | 1.000       |
| Control    | 24    | Large      | Female  | - Control   | -0.1  | Small      | Male    | -3.2500    | 5.20 | -0.62540 | 543 | 1.000       |
| Control    | 24    | Large      | Female  | - Control   | 0.1   | Large      | Male    | -2.1667    | 5.19 | -0.41737 | 554 | 1.000       |
| Control    | 24    | Large      | Female  | - Control   | 0.1   | Small      | Female  | 3.9167     | 5.20 | 0.75368  | 543 | 1.000       |
| Control    | 24    | Large      | Female  | - Control   | 0.1   | Small      | Male    | -9.8333    | 5.20 | -1.89223 | 543 | 1.000       |
| Control    | 24    | Large      | Female  | - Control   | 24    | Large      | Male    | 1.5833     | 5.19 | 0.30500  | 554 | 1.000       |
| Control    | 24    | Large      | Female  | - Control   | 24    | Small      | Female  | 5.8333     | 5.20 | 1.12251  | 543 | 1.000       |
| Control    | 24    | Large      | Female  | - Control   | 24    | Small      | Male    | -4.5833    | 5.20 | -0.88197 | 543 | 1.000       |
| Control    | 24    | Large      | Female  | - Control   | 4     | Large      | Male    | 1.5000     | 5.19 | 0.28895  | 554 | 1.000       |
| Control    | 24    | Large      | Female  | - Control   | 4     | Small      | Female  | 5.7500     | 5.20 | 1.10647  | 543 | 1.000       |
| Control    | 24    | Large      | Female  | - Control   | 4     | Small      | Male    | -3.0833    | 5.20 | -0.59333 | 543 | 1.000       |
| Control    | 24    | Large      | Female  | - Treatment | -0.1  | Large      | Male    | -7.3125    | 4.86 | -1.50430 | 543 | 1.000       |
| Control    | 24    | Large      | Female  | - Treatment | -0.1  | Small      | Female  | 7.1667     | 5.20 | 1.37908  | 543 | 1.000       |
| Control    | 24    | Large      | Female  | - Treatment | -0.1  | Small      | Male    | 0.7500     | 5.20 | 0.14432  | 543 | 1.000       |
| Control    | 24    | Large      | Female  | - Treatment | 0.1   | Large      | Male    | -10.7500   | 4.86 | -2.21145 | 543 | 1.000       |
| Control    | 24    | Large      | Female  | - Treatment | 0.1   | Small      | Female  | 18.9167    | 5.20 | 3.64013  | 543 | 0.337       |
| Control    | 24    | Large      | Female  | - Treatment | 0.1   | Small      | Male    | -33.1667   | 5.20 | -6.38226 | 543 | < .001      |
| Control    | 24    | Large      | Female  | - Treatment | 24    | Large      | Female  | 1.2500     | 4.86 | 0.25715  | 543 | 1.000       |
| Control    | 24    | Large      | Female  | - Treatment | 24    | Large      | Male    | -26.8125   | 4.86 | -5.51576 | 543 | < .001      |
| Control    | 24    | Large      | Female  | - Treatment | 24    | Small      | Female  | 10.0000    | 5.20 | 1.92430  | 543 | 1.000       |
| Control    | 24    | Large      | Female  | - Treatment | 24    | Small      | Male    | -12.4167   | 5.20 | -2.38934 | 543 | 1.000       |
| Control    | 24    | Large      | Female  | - Treatment | 4     | Large      | Male    | -31.0000   | 4.86 | -6.37720 | 543 | < .001      |
| Control    | 24    | Large      | Female  | - Treatment | 4     | Small      | Female  | 11.6667    | 5.20 | 2.24501  | 543 | 1.000       |
| Control    | 24    | Large      | Female  | - Treatment | 4     | Small      | Male    | -10.2500   | 5.20 | -1.97241 | 543 | 1.000       |
| Control    | 24    | Large      | Helpers | - Control   | -0.1  | Large      | Female  | -7.3446    | 5.19 | -1.41482 | 554 | 1.000       |
| Control    | 24    | Large      | Helpers | - Control   | -0.1  | Large      | Male    | -10.4280   | 5.19 | -2.00877 | 554 | 1.000       |
| Control    | 24    | Large      | Helpers | - Control   | -0.1  | Small      | Female  | -2.8446    | 5.20 | -0.54739 | 543 | 1.000       |
| Control    | 24    | Large      | Helpers | - Control   | -0.1  | Small      | Helpers | 1.2248     | 5.20 | 0.23569  | 543 | 1.000       |
| Control    | 24    | Large      | Helpers | - Control   | -0.1  | Small      | Male    | -12.6780   | 5.20 | -2.43962 | 543 | 1.000       |
| Control    | 24    | Large      | Helpers | - Control   | 0.1   | Large      | Female  | -12.3446   | 5.19 | -2.37798 | 554 | 1.000       |
| Control    | 24    | Large      | Helpers | - Control   | 0.1   | Large      | Male    | -11.5946   | 5.19 | -2.23350 | 554 | 1.000       |
| Control    | 24    | Large      | Helpers | - Control   | 0.1   | Small      | Female  | -5.5113    | 5.20 | -1.06054 | 543 | 1.000       |
| Control    | 24    | Large      | Helpers | - Control   | 0.1   | Small      | Helpers | 3.7179     | 5.20 | 0.71543  | 543 | 1.000       |
| Control    | 24    | Large      | Helpers | - Control   | 0.1   | Small      | Male    | -19.2613   | 5.20 | -3.70645 | 543 | 0.261       |
| Control    | 24    | Large      | Helpers | - Control   | 24    | Large      | Female  | -9.4280    | 5.19 | -1.81613 | 554 | 1.000       |
| Control    | 24    | Large      | Helpers | - Control   | 24    | Large      | Male    | -7.8446    | 5.19 | -1.51113 | 554 | 1.000       |
| Control    | 24    | Large      | Helpers | - Control   | 24    | Small      | Female  | -3.5946    | 5.20 | -0.69172 | 543 | 1.000       |
| Control    | 24    | Large      | Helpers | - Control   | 24    | Small      | Helpers | 1.7873     | 5.20 | 0.34393  | 543 | 1.000       |
| Control    | 24    | Large      | Helpers | - Control   | 24    | Small      | Male    | -14.0113   | 5.20 | -2.69619 | 543 | 1.000       |
| Control    | 24    | Large      | Helpers | - Control   | 4     | Large      | Female  | -8.5946    | 5.19 | -1.65561 | 554 | 1.000       |
| Control    | 24    | Large      | Helpers | - Control   | 4     | Large      | Male    | -7.9280    | 5.19 | -1.52719 | 554 | 1.000       |
| Control    | 24    | Large      | Helpers | - Control   | 4     | Small      | Female  | -3.6780    | 5.20 | -0.70775 | 543 | 1.000       |
| Control    | 24    | Large      | Helpers | - Control   | 4     | Small      | Helpers | 1.4123     | 5.20 | 0.27177  | 543 | 1.000       |
| Control    | 24    | Large      | Helpers | - Control   | 4     | Small      | Male    | -12.5113   | 5.20 | -2.40755 | 543 | 1.000       |
| Control    | 24    | Large      | Helpers | - Treatment | -0.1  | Large      | Female  | -11.1780   | 4.86 | -2.29949 | 543 | 1.000       |
| Control    | 24    | Large      | Helpers | - Treatment | -0.1  | Large      | Male    | -16.7405   | 4.86 | -3.44379 | 543 | 0.697       |

## Post Hoc Comparisons - Treatment \* Hours \* Group Size \* Subject

| Comparison |       |            |         |             |       |            |         |            |      |          |     |             |
|------------|-------|------------|---------|-------------|-------|------------|---------|------------|------|----------|-----|-------------|
| Treatment  | Hours | Group Size | Subject | Treatment   | Hours | Group Size | Subject | Difference | SE   | t        | df  | Pbonferroni |
| Control    | 24    | Large      | Helpers | - Treatment | -0.1  | Small      | Female  | -2.2613    | 5.20 | -0.43514 | 543 | 1.000       |
| Control    | 24    | Large      | Helpers | - Treatment | -0.1  | Small      | Helpers | 0.3429     | 5.20 | 0.06598  | 543 | 1.000       |
| Control    | 24    | Large      | Helpers | - Treatment | -0.1  | Small      | Male    | -8.6780    | 5.20 | -1.66990 | 543 | 1.000       |
| Control    | 24    | Large      | Helpers | - Treatment | 0.1   | Large      | Female  | -10.9280   | 4.86 | -2.24806 | 543 | 1.000       |
| Control    | 24    | Large      | Helpers | - Treatment | 0.1   | Large      | Male    | -20.1780   | 4.86 | -4.15094 | 543 | 0.043       |
| Control    | 24    | Large      | Helpers | - Treatment | 0.1   | Small      | Female  | 9.4887     | 5.20 | 1.82591  | 543 | 1.000       |
| Control    | 24    | Large      | Helpers | - Treatment | 0.1   | Small      | Helpers | 7.1970     | 5.20 | 1.38492  | 543 | 1.000       |
| Control    | 24    | Large      | Helpers | - Treatment | 0.1   | Small      | Male    | -42.5946   | 5.20 | -8.19648 | 543 | < .001      |
| Control    | 24    | Large      | Helpers | - Treatment | 24    | Large      | Female  | -8.1780    | 4.86 | -1.68234 | 543 | 1.000       |
| Control    | 24    | Large      | Helpers | - Treatment | 24    | Large      | Helpers | 3.2934     | 4.86 | 0.67750  | 543 | 1.000       |
| Control    | 24    | Large      | Helpers | - Treatment | 24    | Large      | Male    | -36.2405   | 4.86 | -7.45525 | 543 | < .001      |
| Control    | 24    | Large      | Helpers | - Treatment | 24    | Small      | Female  | 0.5720     | 5.20 | 0.11007  | 543 | 1.000       |
| Control    | 24    | Large      | Helpers | - Treatment | 24    | Small      | Helpers | 4.5720     | 5.20 | 0.87979  | 543 | 1.000       |
| Control    | 24    | Large      | Helpers | - Treatment | 24    | Small      | Male    | -21.8446   | 5.20 | -4.20356 | 543 | 0.035       |
| Control    | 24    | Large      | Helpers | - Treatment | 4     | Large      | Female  | 4.8845     | 4.86 | 1.00483  | 543 | 1.000       |
| Control    | 24    | Large      | Helpers | - Treatment | 4     | Large      | Male    | -40.4280   | 4.86 | -8.31669 | 543 | < .001      |
| Control    | 24    | Large      | Helpers | - Treatment | 4     | Small      | Female  | 2.2387     | 5.20 | 0.43079  | 543 | 1.000       |
| Control    | 24    | Large      | Helpers | - Treatment | 4     | Small      | Helpers | 2.8845     | 5.20 | 0.55507  | 543 | 1.000       |
| Control    | 24    | Large      | Helpers | - Treatment | 4     | Small      | Male    | -19.6780   | 5.20 | -3.78663 | 543 | 0.191       |
| Control    | 24    | Large      | Male    | - Control   | -0.1  | Small      | Male    | -4.8333    | 5.20 | -0.93008 | 543 | 1.000       |
| Control    | 24    | Large      | Male    | - Control   | 0.1   | Small      | Male    | -11.4167   | 5.20 | -2.19691 | 543 | 1.000       |
| Control    | 24    | Large      | Male    | - Control   | 24    | Small      | Male    | -6.1667    | 5.20 | -1.18665 | 543 | 1.000       |
| Control    | 24    | Large      | Male    | - Control   | 4     | Small      | Male    | -4.6667    | 5.20 | -0.89801 | 543 | 1.000       |
| Control    | 24    | Large      | Male    | - Treatment | -0.1  | Small      | Male    | -0.8333    | 5.20 | -0.16036 | 543 | 1.000       |
| Control    | 24    | Large      | Male    | - Treatment | 0.1   | Small      | Male    | -34.7500   | 5.20 | -6.68694 | 543 | < .001      |
| Control    | 24    | Large      | Male    | - Treatment | 24    | Large      | Male    | -28.3958   | 4.86 | -5.84148 | 543 | < .001      |
| Control    | 24    | Large      | Male    | - Treatment | 24    | Small      | Male    | -14.0000   | 5.20 | -2.69402 | 543 | 1.000       |
| Control    | 24    | Large      | Male    | - Treatment | 4     | Small      | Male    | -11.8333   | 5.20 | -2.27709 | 543 | 1.000       |
| Control    | 24    | Small      | Female  | - Control   | -0.1  | Large      | Male    | -6.8333    | 5.20 | -1.31494 | 543 | 1.000       |
| Control    | 24    | Small      | Female  | - Control   | -0.1  | Small      | Male    | -9.0833    | 5.19 | -1.74974 | 554 | 1.000       |
| Control    | 24    | Small      | Female  | - Control   | 0.1   | Large      | Male    | -8.0000    | 5.20 | -1.53944 | 543 | 1.000       |
| Control    | 24    | Small      | Female  | - Control   | 0.1   | Small      | Male    | -15.6667   | 5.19 | -3.01791 | 554 | 1.000       |
| Control    | 24    | Small      | Female  | - Control   | 24    | Large      | Male    | -4.2500    | 5.20 | -0.81783 | 543 | 1.000       |
| Control    | 24    | Small      | Female  | - Control   | 24    | Small      | Male    | -10.4167   | 5.19 | -2.00659 | 554 | 1.000       |
| Control    | 24    | Small      | Female  | - Control   | 4     | Large      | Male    | -4.3333    | 5.20 | -0.83386 | 543 | 1.000       |
| Control    | 24    | Small      | Female  | - Control   | 4     | Small      | Male    | -8.9167    | 5.19 | -1.71764 | 554 | 1.000       |
| Control    | 24    | Small      | Female  | - Treatment | -0.1  | Large      | Male    | -13.1458   | 4.86 | -2.70431 | 543 | 1.000       |
| Control    | 24    | Small      | Female  | - Treatment | -0.1  | Small      | Male    | -5.0833    | 5.20 | -0.97818 | 543 | 1.000       |
| Control    | 24    | Small      | Female  | - Treatment | 0.1   | Large      | Male    | -16.5833   | 4.86 | -3.41146 | 543 | 0.783       |
| Control    | 24    | Small      | Female  | - Treatment | 0.1   | Small      | Male    | -39.0000   | 5.20 | -7.50476 | 543 | < .001      |
| Control    | 24    | Small      | Female  | - Treatment | 24    | Large      | Male    | -32.6458   | 4.86 | -6.71577 | 543 | < .001      |
| Control    | 24    | Small      | Female  | - Treatment | 24    | Small      | Female  | 4.1667     | 5.20 | 0.80179  | 543 | 1.000       |
| Control    | 24    | Small      | Female  | - Treatment | 24    | Small      | Male    | -18.2500   | 5.20 | -3.51184 | 543 | 0.544       |
| Control    | 24    | Small      | Female  | - Treatment | 4     | Large      | Male    | -36.8333   | 4.86 | -7.57721 | 543 | < .001      |
| Control    | 24    | Small      | Female  | - Treatment | 4     | Small      | Male    | -16.0833   | 5.20 | -3.09491 | 543 | 1.000       |
| Control    | 24    | Small      | Helpers | - Control   | -0.1  | Large      | Female  | -9.1319    | 5.20 | -1.75726 | 543 | 1.000       |
| Control    | 24    | Small      | Helpers | - Control   | -0.1  | Large      | Male    | -12.2153   | 5.20 | -2.35058 | 543 | 1.000       |
| Control    | 24    | Small      | Helpers | - Control   | -0.1  | Small      | Female  | -4.6319    | 5.19 | -0.89226 | 554 | 1.000       |
| Control    | 24    | Small      | Helpers | - Control   | -0.1  | Small      | Male    | -14.4653   | 5.19 | -2.78648 | 554 | 1.000       |
| Control    | 24    | Small      | Helpers | - Control   | 0.1   | Large      | Female  | -14.1319   | 5.20 | -2.71941 | 543 | 1.000       |
| Control    | 24    | Small      | Helpers | - Control   | 0.1   | Large      | Male    | -13.3819   | 5.20 | -2.57509 | 543 | 1.000       |
| Control    | 24    | Small      | Helpers | - Control   | 0.1   | Small      | Female  | -7.2986    | 5.19 | -1.40595 | 554 | 1.000       |
| Control    | 24    | Small      | Helpers | - Control   | 0.1   | Small      | Male    | -21.0486   | 5.19 | -4.05464 | 554 | 0.065       |
| Control    | 24    | Small      | Helpers | - Control   | 24    | Large      | Female  | -11.2153   | 5.20 | -2.15815 | 543 | 1.000       |
| Control    | 24    | Small      | Helpers | - Control   | 24    | Large      | Male    | -9.6319    | 5.20 | -1.85347 | 543 | 1.000       |
| Control    | 24    | Small      | Helpers | - Control   | 24    | Small      | Female  | -5.3819    | 5.19 | -1.03674 | 554 | 1.000       |
| Control    | 24    | Small      | Helpers | - Control   | 24    | Small      | Male    | -15.7986   | 5.19 | -3.04332 | 554 | 1.000       |
| Control    | 24    | Small      | Helpers | - Control   | 4     | Large      | Female  | -10.3819   | 5.20 | -1.99780 | 543 | 1.000       |
| Control    | 24    | Small      | Helpers | - Control   | 4     | Large      | Male    | -9.7153    | 5.20 | -1.86951 | 543 | 1.000       |
| Control    | 24    | Small      | Helpers | - Control   | 4     | Small      | Female  | -5.4653    | 5.19 | -1.05279 | 554 | 1.000       |



## Post Hoc Comparisons - Treatment \* Hours \* Group Size \* Subject

| Comparison |       |            |         |             |       |            |         |            |      |          |     |             |
|------------|-------|------------|---------|-------------|-------|------------|---------|------------|------|----------|-----|-------------|
| Treatment  | Hours | Group Size | Subject | Treatment   | Hours | Group Size | Subject | Difference | SE   | t        | df  | Pbonferroni |
| Control    | 24    | Small      | Helpers | - Control   | 4     | Small      | Male    | -14.2986   | 5.19 | -2.75438 | 554 | 1.000       |
| Control    | 24    | Small      | Helpers | - Treatment | -0.1  | Large      | Female  | -12.9653   | 4.86 | -2.66717 | 543 | 1.000       |
| Control    | 24    | Small      | Helpers | - Treatment | -0.1  | Large      | Male    | -18.5278   | 4.86 | -3.81146 | 543 | 0.174       |
| Control    | 24    | Small      | Helpers | - Treatment | -0.1  | Small      | Female  | -4.0486    | 5.20 | -0.77907 | 543 | 1.000       |
| Control    | 24    | Small      | Helpers | - Treatment | -0.1  | Small      | Male    | -10.4653   | 5.20 | -2.01383 | 543 | 1.000       |
| Control    | 24    | Small      | Helpers | - Treatment | 0.1   | Large      | Female  | -12.7153   | 4.86 | -2.61574 | 543 | 1.000       |
| Control    | 24    | Small      | Helpers | - Treatment | 0.1   | Large      | Male    | -21.9653   | 4.86 | -4.51861 | 543 | 0.009       |
| Control    | 24    | Small      | Helpers | - Treatment | 0.1   | Small      | Female  | 7.7014     | 5.20 | 1.48198  | 543 | 1.000       |
| Control    | 24    | Small      | Helpers | - Treatment | 0.1   | Small      | Male    | -44.3819   | 5.20 | -8.54041 | 543 | < .001      |
| Control    | 24    | Small      | Helpers | - Treatment | 24    | Large      | Female  | -9.9653    | 4.86 | -2.05002 | 543 | 1.000       |
| Control    | 24    | Small      | Helpers | - Treatment | 24    | Large      | Male    | -38.0278   | 4.86 | -7.82293 | 543 | < .001      |
| Control    | 24    | Small      | Helpers | - Treatment | 24    | Small      | Female  | -1.2153    | 5.20 | -0.23386 | 543 | 1.000       |
| Control    | 24    | Small      | Helpers | - Treatment | 24    | Small      | Helpers | 2.7847     | 5.20 | 0.53586  | 543 | 1.000       |
| Control    | 24    | Small      | Helpers | - Treatment | 24    | Small      | Male    | -23.6319   | 5.20 | -4.54749 | 543 | 0.008       |
| Control    | 24    | Small      | Helpers | - Treatment | 4     | Large      | Female  | 3.0972     | 4.86 | 0.63715  | 543 | 1.000       |
| Control    | 24    | Small      | Helpers | - Treatment | 4     | Large      | Male    | -42.2153   | 4.86 | -8.68436 | 543 | < .001      |
| Control    | 24    | Small      | Helpers | - Treatment | 4     | Small      | Female  | 0.4514     | 5.20 | 0.08686  | 543 | 1.000       |
| Control    | 24    | Small      | Helpers | - Treatment | 4     | Small      | Male    | -21.4653   | 5.20 | -4.13056 | 543 | 0.047       |
| Control    | 24    | Small      | Male    | - Treatment | 24    | Small      | Male    | -7.8333    | 5.20 | -1.50737 | 543 | 1.000       |
| Control    | 4     | Large      | Female  | - Control   | -0.1  | Large      | Male    | -1.8333    | 5.19 | -0.35316 | 554 | 1.000       |
| Control    | 4     | Large      | Female  | - Control   | -0.1  | Small      | Female  | 5.7500     | 5.20 | 1.10647  | 543 | 1.000       |
| Control    | 4     | Large      | Female  | - Control   | -0.1  | Small      | Male    | -4.0833    | 5.20 | -0.78576 | 543 | 1.000       |
| Control    | 4     | Large      | Female  | - Control   | 0.1   | Large      | Male    | -3.0000    | 5.19 | -0.57790 | 554 | 1.000       |
| Control    | 4     | Large      | Female  | - Control   | 0.1   | Small      | Female  | 3.0833     | 5.20 | 0.59333  | 543 | 1.000       |
| Control    | 4     | Large      | Female  | - Control   | 0.1   | Small      | Male    | -10.6667   | 5.20 | -2.05258 | 543 | 1.000       |
| Control    | 4     | Large      | Female  | - Control   | 24    | Large      | Female  | -0.8333    | 5.19 | -0.16053 | 554 | 1.000       |
| Control    | 4     | Large      | Female  | - Control   | 24    | Large      | Male    | 0.7500     | 5.19 | 0.14447  | 554 | 1.000       |
| Control    | 4     | Large      | Female  | - Control   | 24    | Small      | Female  | 5.0000     | 5.20 | 0.96215  | 543 | 1.000       |
| Control    | 4     | Large      | Female  | - Control   | 24    | Small      | Male    | -5.4167    | 5.20 | -1.04233 | 543 | 1.000       |
| Control    | 4     | Large      | Female  | - Control   | 4     | Large      | Male    | 0.6667     | 5.19 | 0.12842  | 554 | 1.000       |
| Control    | 4     | Large      | Female  | - Control   | 4     | Small      | Female  | 4.9167     | 5.20 | 0.94611  | 543 | 1.000       |
| Control    | 4     | Large      | Female  | - Control   | 4     | Small      | Male    | -3.9167    | 5.20 | -0.75368 | 543 | 1.000       |
| Control    | 4     | Large      | Female  | - Treatment | -0.1  | Large      | Male    | -8.1458    | 4.86 | -1.67573 | 543 | 1.000       |
| Control    | 4     | Large      | Female  | - Treatment | -0.1  | Small      | Female  | 6.3333     | 5.20 | 1.21872  | 543 | 1.000       |
| Control    | 4     | Large      | Female  | - Treatment | -0.1  | Small      | Male    | -0.0833    | 5.20 | -0.01604 | 543 | 1.000       |
| Control    | 4     | Large      | Female  | - Treatment | 0.1   | Large      | Male    | -11.5833   | 4.86 | -2.38288 | 543 | 1.000       |
| Control    | 4     | Large      | Female  | - Treatment | 0.1   | Small      | Female  | 18.0833    | 5.20 | 3.47977  | 543 | 0.612       |
| Control    | 4     | Large      | Female  | - Treatment | 0.1   | Small      | Male    | -34.0000   | 5.20 | -6.54261 | 543 | < .001      |
| Control    | 4     | Large      | Female  | - Treatment | 24    | Large      | Female  | 0.4167     | 4.86 | 0.08572  | 543 | 1.000       |
| Control    | 4     | Large      | Female  | - Treatment | 24    | Large      | Male    | -27.6458   | 4.86 | -5.68719 | 543 | < .001      |
| Control    | 4     | Large      | Female  | - Treatment | 24    | Small      | Female  | 9.1667     | 5.20 | 1.76394  | 543 | 1.000       |
| Control    | 4     | Large      | Female  | - Treatment | 24    | Small      | Male    | -13.2500   | 5.20 | -2.54970 | 543 | 1.000       |
| Control    | 4     | Large      | Female  | - Treatment | 4     | Large      | Female  | 13.4792    | 4.86 | 2.77288  | 543 | 1.000       |
| Control    | 4     | Large      | Female  | - Treatment | 4     | Large      | Male    | -31.8333   | 4.86 | -6.54863 | 543 | < .001      |
| Control    | 4     | Large      | Female  | - Treatment | 4     | Small      | Female  | 10.8333    | 5.20 | 2.08466  | 543 | 1.000       |
| Control    | 4     | Large      | Female  | - Treatment | 4     | Small      | Male    | -11.0833   | 5.20 | -2.13276 | 543 | 1.000       |
| Control    | 4     | Large      | Helpers | - Control   | -0.1  | Large      | Female  | -7.2652    | 5.19 | -1.39951 | 554 | 1.000       |
| Control    | 4     | Large      | Helpers | - Control   | -0.1  | Large      | Male    | -10.3485   | 5.19 | -1.99346 | 554 | 1.000       |
| Control    | 4     | Large      | Helpers | - Control   | -0.1  | Small      | Female  | -2.7652    | 5.20 | -0.53210 | 543 | 1.000       |
| Control    | 4     | Large      | Helpers | - Control   | -0.1  | Small      | Helpers | 1.3043     | 5.20 | 0.25098  | 543 | 1.000       |
| Control    | 4     | Large      | Helpers | - Control   | -0.1  | Small      | Male    | -12.5985   | 5.20 | -2.42433 | 543 | 1.000       |
| Control    | 4     | Large      | Helpers | - Control   | 0.1   | Large      | Female  | -12.2652   | 5.19 | -2.36267 | 554 | 1.000       |
| Control    | 4     | Large      | Helpers | - Control   | 0.1   | Large      | Male    | -11.5152   | 5.19 | -2.21820 | 554 | 1.000       |
| Control    | 4     | Large      | Helpers | - Control   | 0.1   | Small      | Female  | -5.4318    | 5.20 | -1.04525 | 543 | 1.000       |
| Control    | 4     | Large      | Helpers | - Control   | 0.1   | Small      | Helpers | 3.7973     | 5.20 | 0.73072  | 543 | 1.000       |
| Control    | 4     | Large      | Helpers | - Control   | 0.1   | Small      | Male    | -19.1818   | 5.20 | -3.69116 | 543 | 0.277       |
| Control    | 4     | Large      | Helpers | - Control   | 24    | Large      | Female  | -9.3485    | 5.19 | -1.80083 | 554 | 1.000       |
| Control    | 4     | Large      | Helpers | - Control   | 24    | Large      | Helpers | 0.0795     | 5.19 | 0.01531  | 554 | 1.000       |
| Control    | 4     | Large      | Helpers | - Control   | 24    | Large      | Male    | -7.7652    | 5.19 | -1.49582 | 554 | 1.000       |
| Control    | 4     | Large      | Helpers | - Control   | 24    | Small      | Female  | -3.5152    | 5.20 | -0.67643 | 543 | 1.000       |

## Post Hoc Comparisons - Treatment \* Hours \* Group Size \* Subject

| Comparison |       |            |         |             |       |            |         |            |      |          |     |             |
|------------|-------|------------|---------|-------------|-------|------------|---------|------------|------|----------|-----|-------------|
| Treatment  | Hours | Group Size | Subject | Treatment   | Hours | Group Size | Subject | Difference | SE   | t        | df  | Pbonferroni |
| Control    | 4     | Large      | Helpers | - Control   | 24    | Small      | Helpers | 1.8668     | 5.20 | 0.35922  | 543 | 1.000       |
| Control    | 4     | Large      | Helpers | - Control   | 24    | Small      | Male    | -13.9318   | 5.20 | -2.68090 | 543 | 1.000       |
| Control    | 4     | Large      | Helpers | - Control   | 4     | Large      | Female  | -8.5152    | 5.19 | -1.64030 | 554 | 1.000       |
| Control    | 4     | Large      | Helpers | - Control   | 4     | Large      | Male    | -7.8485    | 5.19 | -1.51188 | 554 | 1.000       |
| Control    | 4     | Large      | Helpers | - Control   | 4     | Small      | Female  | -3.5985    | 5.20 | -0.69246 | 543 | 1.000       |
| Control    | 4     | Large      | Helpers | - Control   | 4     | Small      | Helpers | 1.4918     | 5.20 | 0.28706  | 543 | 1.000       |
| Control    | 4     | Large      | Helpers | - Control   | 4     | Small      | Male    | -12.4318   | 5.20 | -2.39226 | 543 | 1.000       |
| Control    | 4     | Large      | Helpers | - Treatment | -0.1  | Large      | Female  | -11.0985   | 4.86 | -2.28314 | 543 | 1.000       |
| Control    | 4     | Large      | Helpers | - Treatment | -0.1  | Large      | Male    | -16.6610   | 4.86 | -3.42744 | 543 | 0.739       |
| Control    | 4     | Large      | Helpers | - Treatment | -0.1  | Small      | Female  | -2.1818    | 5.20 | -0.41985 | 543 | 1.000       |
| Control    | 4     | Large      | Helpers | - Treatment | -0.1  | Small      | Helpers | 0.4223     | 5.20 | 0.08127  | 543 | 1.000       |
| Control    | 4     | Large      | Helpers | - Treatment | -0.1  | Small      | Male    | -8.5985    | 5.20 | -1.65461 | 543 | 1.000       |
| Control    | 4     | Large      | Helpers | - Treatment | 0.1   | Large      | Female  | -10.8485   | 4.86 | -2.23171 | 543 | 1.000       |
| Control    | 4     | Large      | Helpers | - Treatment | 0.1   | Large      | Male    | -20.0985   | 4.86 | -4.13459 | 543 | 0.046       |
| Control    | 4     | Large      | Helpers | - Treatment | 0.1   | Small      | Female  | 9.5682     | 5.20 | 1.84120  | 543 | 1.000       |
| Control    | 4     | Large      | Helpers | - Treatment | 0.1   | Small      | Helpers | 7.2765     | 5.20 | 1.40021  | 543 | 1.000       |
| Control    | 4     | Large      | Helpers | - Treatment | 0.1   | Small      | Male    | -42.5152   | 5.20 | -8.18119 | 543 | < .001      |
| Control    | 4     | Large      | Helpers | - Treatment | 24    | Large      | Female  | -8.0985    | 4.86 | -1.66599 | 543 | 1.000       |
| Control    | 4     | Large      | Helpers | - Treatment | 24    | Large      | Helpers | 3.3728     | 4.86 | 0.69385  | 543 | 1.000       |
| Control    | 4     | Large      | Helpers | - Treatment | 24    | Large      | Male    | -36.1610   | 4.86 | -7.43890 | 543 | < .001      |
| Control    | 4     | Large      | Helpers | - Treatment | 24    | Small      | Female  | 0.6515     | 5.20 | 0.12537  | 543 | 1.000       |
| Control    | 4     | Large      | Helpers | - Treatment | 24    | Small      | Helpers | 4.6515     | 5.20 | 0.89509  | 543 | 1.000       |
| Control    | 4     | Large      | Helpers | - Treatment | 24    | Small      | Male    | -21.7652   | 5.20 | -4.18827 | 543 | 0.037       |
| Control    | 4     | Large      | Helpers | - Treatment | 4     | Large      | Female  | 4.9640     | 4.86 | 1.02117  | 543 | 1.000       |
| Control    | 4     | Large      | Helpers | - Treatment | 4     | Large      | Helpers | 2.2884     | 4.86 | 0.47076  | 543 | 1.000       |
| Control    | 4     | Large      | Helpers | - Treatment | 4     | Large      | Male    | -40.3485   | 4.86 | -8.30034 | 543 | < .001      |
| Control    | 4     | Large      | Helpers | - Treatment | 4     | Small      | Female  | 2.3182     | 5.20 | 0.44608  | 543 | 1.000       |
| Control    | 4     | Large      | Helpers | - Treatment | 4     | Small      | Helpers | 2.9640     | 5.20 | 0.57036  | 543 | 1.000       |
| Control    | 4     | Large      | Helpers | - Treatment | 4     | Small      | Male    | -19.5985   | 5.20 | -3.77134 | 543 | 0.203       |
| Control    | 4     | Large      | Male    | - Control   | -0.1  | Small      | Male    | -4.7500    | 5.20 | -0.91404 | 543 | 1.000       |
| Control    | 4     | Large      | Male    | - Control   | 0.1   | Small      | Male    | -11.3333   | 5.20 | -2.18087 | 543 | 1.000       |
| Control    | 4     | Large      | Male    | - Control   | 24    | Large      | Male    | 0.0833     | 5.19 | 0.01605  | 554 | 1.000       |
| Control    | 4     | Large      | Male    | - Control   | 24    | Small      | Male    | -6.0833    | 5.20 | -1.17061 | 543 | 1.000       |
| Control    | 4     | Large      | Male    | - Control   | 4     | Small      | Male    | -4.5833    | 5.20 | -0.88197 | 543 | 1.000       |
| Control    | 4     | Large      | Male    | - Treatment | -0.1  | Small      | Male    | -0.7500    | 5.20 | -0.14432 | 543 | 1.000       |
| Control    | 4     | Large      | Male    | - Treatment | 0.1   | Small      | Male    | -34.6667   | 5.20 | -6.67090 | 543 | < .001      |
| Control    | 4     | Large      | Male    | - Treatment | 24    | Large      | Male    | -28.3125   | 4.86 | -5.82434 | 543 | < .001      |
| Control    | 4     | Large      | Male    | - Treatment | 24    | Small      | Male    | -13.9167   | 5.20 | -2.67798 | 543 | 1.000       |
| Control    | 4     | Large      | Male    | - Treatment | 4     | Large      | Male    | -32.5000   | 4.86 | -6.68577 | 543 | < .001      |
| Control    | 4     | Large      | Male    | - Treatment | 4     | Small      | Male    | -11.7500   | 5.20 | -2.26105 | 543 | 1.000       |
| Control    | 4     | Small      | Female  | - Control   | -0.1  | Large      | Male    | -6.7500    | 5.20 | -1.29890 | 543 | 1.000       |
| Control    | 4     | Small      | Female  | - Control   | -0.1  | Small      | Male    | -9.0000    | 5.19 | -1.73369 | 554 | 1.000       |
| Control    | 4     | Small      | Female  | - Control   | 0.1   | Large      | Male    | -7.9167    | 5.20 | -1.52340 | 543 | 1.000       |
| Control    | 4     | Small      | Female  | - Control   | 0.1   | Small      | Male    | -15.5833   | 5.19 | -3.00185 | 554 | 1.000       |
| Control    | 4     | Small      | Female  | - Control   | 24    | Large      | Male    | -4.1667    | 5.20 | -0.80179 | 543 | 1.000       |
| Control    | 4     | Small      | Female  | - Control   | 24    | Small      | Female  | 0.0833     | 5.19 | 0.01605  | 554 | 1.000       |
| Control    | 4     | Small      | Female  | - Control   | 24    | Small      | Male    | -10.3333   | 5.19 | -1.99053 | 554 | 1.000       |
| Control    | 4     | Small      | Female  | - Control   | 4     | Large      | Male    | -4.2500    | 5.20 | -0.81783 | 543 | 1.000       |
| Control    | 4     | Small      | Female  | - Control   | 4     | Small      | Male    | -8.8333    | 5.19 | -1.70159 | 554 | 1.000       |
| Control    | 4     | Small      | Female  | - Treatment | -0.1  | Large      | Male    | -13.0625   | 4.86 | -2.68717 | 543 | 1.000       |
| Control    | 4     | Small      | Female  | - Treatment | -0.1  | Small      | Male    | -5.0000    | 5.20 | -0.96215 | 543 | 1.000       |
| Control    | 4     | Small      | Female  | - Treatment | 0.1   | Large      | Male    | -16.5000   | 4.86 | -3.39432 | 543 | 0.833       |
| Control    | 4     | Small      | Female  | - Treatment | 0.1   | Small      | Male    | -38.9167   | 5.20 | -7.48873 | 543 | < .001      |
| Control    | 4     | Small      | Female  | - Treatment | 24    | Large      | Male    | -32.5625   | 4.86 | -6.69863 | 543 | < .001      |
| Control    | 4     | Small      | Female  | - Treatment | 24    | Small      | Female  | 4.2500     | 5.20 | 0.81783  | 543 | 1.000       |
| Control    | 4     | Small      | Female  | - Treatment | 24    | Small      | Male    | -18.1667   | 5.20 | -3.49581 | 543 | 0.577       |
| Control    | 4     | Small      | Female  | - Treatment | 4     | Large      | Male    | -36.7500   | 4.86 | -7.56007 | 543 | < .001      |
| Control    | 4     | Small      | Female  | - Treatment | 4     | Small      | Female  | 5.9167     | 5.20 | 1.13854  | 543 | 1.000       |
| Control    | 4     | Small      | Female  | - Treatment | 4     | Small      | Male    | -16.0000   | 5.20 | -3.07888 | 543 | 1.000       |
| Control    | 4     | Small      | Helpers | - Control   | -0.1  | Large      | Female  | -8.7569    | 5.20 | -1.68510 | 543 | 1.000       |

## Post Hoc Comparisons - Treatment \* Hours \* Group Size \* Subject

| Comparison |       |            |         |             |       |            |         |            |      |          |     |             |
|------------|-------|------------|---------|-------------|-------|------------|---------|------------|------|----------|-----|-------------|
| Treatment  | Hours | Group Size | Subject | Treatment   | Hours | Group Size | Subject | Difference | SE   | t        | df  | Pbonferroni |
| Control    | 4     | Small      | Helpers | - Control   | -0.1  | Large      | Male    | -11.8403   | 5.20 | -2.27842 | 543 | 1.000       |
| Control    | 4     | Small      | Helpers | - Control   | -0.1  | Small      | Female  | -4.2569    | 5.19 | -0.82003 | 554 | 1.000       |
| Control    | 4     | Small      | Helpers | - Control   | -0.1  | Small      | Male    | -14.0903   | 5.19 | -2.71424 | 554 | 1.000       |
| Control    | 4     | Small      | Helpers | - Control   | 0.1   | Large      | Female  | -13.7569   | 5.20 | -2.64725 | 543 | 1.000       |
| Control    | 4     | Small      | Helpers | - Control   | 0.1   | Large      | Male    | -13.0069   | 5.20 | -2.50292 | 543 | 1.000       |
| Control    | 4     | Small      | Helpers | - Control   | 0.1   | Small      | Female  | -6.9236    | 5.19 | -1.33371 | 554 | 1.000       |
| Control    | 4     | Small      | Helpers | - Control   | 0.1   | Small      | Male    | -20.6736   | 5.19 | -3.98241 | 554 | 0.087       |
| Control    | 4     | Small      | Helpers | - Control   | 24    | Large      | Female  | -10.8403   | 5.20 | -2.08599 | 543 | 1.000       |
| Control    | 4     | Small      | Helpers | - Control   | 24    | Large      | Male    | -9.2569    | 5.20 | -1.78131 | 543 | 1.000       |
| Control    | 4     | Small      | Helpers | - Control   | 24    | Small      | Female  | -5.0069    | 5.19 | -0.96450 | 554 | 1.000       |
| Control    | 4     | Small      | Helpers | - Control   | 24    | Small      | Helpers | 0.3750     | 5.19 | 0.07224  | 554 | 1.000       |
| Control    | 4     | Small      | Helpers | - Control   | 24    | Small      | Male    | -15.4236   | 5.19 | -2.97109 | 554 | 1.000       |
| Control    | 4     | Small      | Helpers | - Control   | 4     | Large      | Female  | -10.0069   | 5.20 | -1.92563 | 543 | 1.000       |
| Control    | 4     | Small      | Helpers | - Control   | 4     | Large      | Male    | -9.3403    | 5.20 | -1.79735 | 543 | 1.000       |
| Control    | 4     | Small      | Helpers | - Control   | 4     | Small      | Female  | -5.0903    | 5.19 | -0.98055 | 554 | 1.000       |
| Control    | 4     | Small      | Helpers | - Control   | 4     | Small      | Male    | -13.9236   | 5.19 | -2.68214 | 554 | 1.000       |
| Control    | 4     | Small      | Helpers | - Treatment | -0.1  | Large      | Female  | -12.5903   | 4.86 | -2.59002 | 543 | 1.000       |
| Control    | 4     | Small      | Helpers | - Treatment | -0.1  | Large      | Male    | -18.1528   | 4.86 | -3.73432 | 543 | 0.235       |
| Control    | 4     | Small      | Helpers | - Treatment | -0.1  | Small      | Female  | -3.6736    | 5.20 | -0.70691 | 543 | 1.000       |
| Control    | 4     | Small      | Helpers | - Treatment | -0.1  | Small      | Male    | -10.0903   | 5.20 | -1.94167 | 543 | 1.000       |
| Control    | 4     | Small      | Helpers | - Treatment | 0.1   | Large      | Female  | -12.3403   | 4.86 | -2.53859 | 543 | 1.000       |
| Control    | 4     | Small      | Helpers | - Treatment | 0.1   | Large      | Male    | -21.5903   | 4.86 | -4.44147 | 543 | 0.012       |
| Control    | 4     | Small      | Helpers | - Treatment | 0.1   | Small      | Female  | 8.0764     | 5.20 | 1.55414  | 543 | 1.000       |
| Control    | 4     | Small      | Helpers | - Treatment | 0.1   | Small      | Male    | -44.0069   | 5.20 | -8.46825 | 543 | < .001      |
| Control    | 4     | Small      | Helpers | - Treatment | 24    | Large      | Female  | -9.5903    | 4.86 | -1.97287 | 543 | 1.000       |
| Control    | 4     | Small      | Helpers | - Treatment | 24    | Large      | Male    | -37.6528   | 4.86 | -7.74578 | 543 | < .001      |
| Control    | 4     | Small      | Helpers | - Treatment | 24    | Small      | Female  | -0.8403    | 5.20 | -0.16169 | 543 | 1.000       |
| Control    | 4     | Small      | Helpers | - Treatment | 24    | Small      | Helpers | 3.1597     | 5.20 | 0.60802  | 543 | 1.000       |
| Control    | 4     | Small      | Helpers | - Treatment | 24    | Small      | Male    | -23.2569   | 5.20 | -4.47533 | 543 | 0.010       |
| Control    | 4     | Small      | Helpers | - Treatment | 4     | Large      | Female  | 3.4722     | 4.86 | 0.71429  | 543 | 1.000       |
| Control    | 4     | Small      | Helpers | - Treatment | 4     | Large      | Male    | -41.8403   | 4.86 | -8.60722 | 543 | < .001      |
| Control    | 4     | Small      | Helpers | - Treatment | 4     | Small      | Female  | 0.8264     | 5.20 | 0.15902  | 543 | 1.000       |
| Control    | 4     | Small      | Helpers | - Treatment | 4     | Small      | Helpers | 1.4722     | 5.20 | 0.28330  | 543 | 1.000       |
| Control    | 4     | Small      | Helpers | - Treatment | 4     | Small      | Male    | -21.0903   | 5.20 | -4.05840 | 543 | 0.064       |
| Control    | 4     | Small      | Male    | - Control   | 24    | Small      | Male    | -1.5000    | 5.19 | -0.28895 | 554 | 1.000       |
| Control    | 4     | Small      | Male    | - Treatment | 24    | Small      | Male    | -9.3333    | 5.20 | -1.79601 | 543 | 1.000       |
| Control    | 4     | Small      | Male    | - Treatment | 4     | Small      | Male    | -7.1667    | 5.20 | -1.37908 | 543 | 1.000       |
| Treatment  | -0.1  | Large      | Female  | - Control   | -0.1  | Large      | Male    | 0.7500     | 4.86 | 0.15429  | 543 | 1.000       |
| Treatment  | -0.1  | Large      | Female  | - Control   | -0.1  | Small      | Female  | 8.3333     | 4.86 | 1.71430  | 543 | 1.000       |
| Treatment  | -0.1  | Large      | Female  | - Control   | -0.1  | Small      | Male    | -1.5000    | 4.86 | -0.30857 | 543 | 1.000       |
| Treatment  | -0.1  | Large      | Female  | - Control   | 0.1   | Large      | Female  | -1.1667    | 4.86 | -0.24000 | 543 | 1.000       |
| Treatment  | -0.1  | Large      | Female  | - Control   | 0.1   | Large      | Male    | -0.4167    | 4.86 | -0.08572 | 543 | 1.000       |
| Treatment  | -0.1  | Large      | Female  | - Control   | 0.1   | Small      | Female  | 5.6667     | 4.86 | 1.16572  | 543 | 1.000       |
| Treatment  | -0.1  | Large      | Female  | - Control   | 0.1   | Small      | Male    | -8.0833    | 4.86 | -1.66287 | 543 | 1.000       |
| Treatment  | -0.1  | Large      | Female  | - Control   | 24    | Large      | Female  | 1.7500     | 4.86 | 0.36000  | 543 | 1.000       |
| Treatment  | -0.1  | Large      | Female  | - Control   | 24    | Large      | Male    | 3.3333     | 4.86 | 0.68572  | 543 | 1.000       |
| Treatment  | -0.1  | Large      | Female  | - Control   | 24    | Small      | Female  | 7.5833     | 4.86 | 1.56001  | 543 | 1.000       |
| Treatment  | -0.1  | Large      | Female  | - Control   | 24    | Small      | Male    | -2.8333    | 4.86 | -0.58286 | 543 | 1.000       |
| Treatment  | -0.1  | Large      | Female  | - Control   | 4     | Large      | Female  | 2.5833     | 4.86 | 0.53143  | 543 | 1.000       |
| Treatment  | -0.1  | Large      | Female  | - Control   | 4     | Large      | Male    | 3.2500     | 4.86 | 0.66858  | 543 | 1.000       |
| Treatment  | -0.1  | Large      | Female  | - Control   | 4     | Small      | Female  | 7.5000     | 4.86 | 1.54287  | 543 | 1.000       |
| Treatment  | -0.1  | Large      | Female  | - Control   | 4     | Small      | Male    | -1.3333    | 4.86 | -0.27429 | 543 | 1.000       |
| Treatment  | -0.1  | Large      | Female  | - Treatment | -0.1  | Large      | Male    | -5.5625    | 4.50 | -1.23728 | 554 | 1.000       |
| Treatment  | -0.1  | Large      | Female  | - Treatment | -0.1  | Small      | Female  | 8.9167     | 4.86 | 1.83430  | 543 | 1.000       |
| Treatment  | -0.1  | Large      | Female  | - Treatment | -0.1  | Small      | Male    | 2.5000     | 4.86 | 0.51429  | 543 | 1.000       |
| Treatment  | -0.1  | Large      | Female  | - Treatment | 0.1   | Large      | Female  | 0.2500     | 4.50 | 0.05561  | 554 | 1.000       |
| Treatment  | -0.1  | Large      | Female  | - Treatment | 0.1   | Large      | Male    | -9.0000    | 4.50 | -2.00189 | 554 | 1.000       |
| Treatment  | -0.1  | Large      | Female  | - Treatment | 0.1   | Small      | Female  | 20.6667    | 4.86 | 4.25147  | 543 | 0.028       |
| Treatment  | -0.1  | Large      | Female  | - Treatment | 0.1   | Small      | Male    | -31.4167   | 4.86 | -6.46292 | 543 | < .001      |
| Treatment  | -0.1  | Large      | Female  | - Treatment | 24    | Large      | Female  | 3.0000     | 4.50 | 0.66730  | 554 | 1.000       |

Post Hoc Comparisons - Treatment \* Hours \* Group Size \* Subject

| Comparison |       |            |         |           |           |            |         |            |          |      |          |             |        |
|------------|-------|------------|---------|-----------|-----------|------------|---------|------------|----------|------|----------|-------------|--------|
| Treatment  | Hours | Group Size | Subject | Treatment | Hours     | Group Size | Subject | Difference | SE       | t    | df       | Pbonferroni |        |
| Treatment  | -0.1  | Large      | Female  | -         | Treatment | 24         | Large   | Male       | -25.0625 | 4.50 | -5.57472 | 554         | < .001 |
| Treatment  | -0.1  | Large      | Female  | -         | Treatment | 24         | Small   | Female     | 11.7500  | 4.86 | 2.41716  | 543         | 1.000  |
| Treatment  | -0.1  | Large      | Female  | -         | Treatment | 24         | Small   | Male       | -10.6667 | 4.86 | -2.19431 | 543         | 1.000  |
| Treatment  | -0.1  | Large      | Female  | -         | Treatment | 4          | Large   | Female     | 16.0625  | 4.50 | 3.57283  | 554         | 0.433  |
| Treatment  | -0.1  | Large      | Female  | -         | Treatment | 4          | Large   | Male       | -29.2500 | 4.50 | -6.50616 | 554         | < .001 |
| Treatment  | -0.1  | Large      | Female  | -         | Treatment | 4          | Small   | Female     | 13.4167  | 4.86 | 2.76002  | 543         | 1.000  |
| Treatment  | -0.1  | Large      | Female  | -         | Treatment | 4          | Small   | Male       | -8.5000  | 4.86 | -1.74859 | 543         | 1.000  |
| Treatment  | -0.1  | Large      | Helpers | -         | Control   | -0.1       | Large   | Female     | -8.5439  | 4.86 | -1.75762 | 543         | 1.000  |
| Treatment  | -0.1  | Large      | Helpers | -         | Control   | -0.1       | Large   | Male       | -11.6272 | 4.86 | -2.39191 | 543         | 1.000  |
| Treatment  | -0.1  | Large      | Helpers | -         | Control   | -0.1       | Small   | Female     | -4.0439  | 4.86 | -0.83190 | 543         | 1.000  |
| Treatment  | -0.1  | Large      | Helpers | -         | Control   | -0.1       | Small   | Helpers    | 0.0255   | 4.86 | 0.00526  | 543         | 1.000  |
| Treatment  | -0.1  | Large      | Helpers | -         | Control   | -0.1       | Small   | Male       | -13.8772 | 4.86 | -2.85477 | 543         | 1.000  |
| Treatment  | -0.1  | Large      | Helpers | -         | Control   | 0.1        | Large   | Female     | -13.5439 | 4.86 | -2.78620 | 543         | 1.000  |
| Treatment  | -0.1  | Large      | Helpers | -         | Control   | 0.1        | Large   | Helpers    | -0.0385  | 4.86 | -0.00793 | 543         | 1.000  |
| Treatment  | -0.1  | Large      | Helpers | -         | Control   | 0.1        | Large   | Male       | -12.7939 | 4.86 | -2.63191 | 543         | 1.000  |
| Treatment  | -0.1  | Large      | Helpers | -         | Control   | 0.1        | Small   | Female     | -6.7106  | 4.86 | -1.38047 | 543         | 1.000  |
| Treatment  | -0.1  | Large      | Helpers | -         | Control   | 0.1        | Small   | Helpers    | 2.5186   | 4.86 | 0.51812  | 543         | 1.000  |
| Treatment  | -0.1  | Large      | Helpers | -         | Control   | 0.1        | Small   | Male       | -20.4606 | 4.86 | -4.20907 | 543         | 0.034  |
| Treatment  | -0.1  | Large      | Helpers | -         | Control   | 24         | Large   | Female     | -10.6272 | 4.86 | -2.18619 | 543         | 1.000  |
| Treatment  | -0.1  | Large      | Helpers | -         | Control   | 24         | Large   | Helpers    | -1.1993  | 4.86 | -0.24671 | 543         | 1.000  |
| Treatment  | -0.1  | Large      | Helpers | -         | Control   | 24         | Large   | Male       | -9.0439  | 4.86 | -1.86048 | 543         | 1.000  |
| Treatment  | -0.1  | Large      | Helpers | -         | Control   | 24         | Small   | Female     | -4.7939  | 4.86 | -0.98618 | 543         | 1.000  |
| Treatment  | -0.1  | Large      | Helpers | -         | Control   | 24         | Small   | Helpers    | 0.5880   | 4.86 | 0.12097  | 543         | 1.000  |
| Treatment  | -0.1  | Large      | Helpers | -         | Control   | 24         | Small   | Male       | -15.2106 | 4.86 | -3.12906 | 543         | 1.000  |
| Treatment  | -0.1  | Large      | Helpers | -         | Control   | 4          | Large   | Female     | -9.7939  | 4.86 | -2.01476 | 543         | 1.000  |
| Treatment  | -0.1  | Large      | Helpers | -         | Control   | 4          | Large   | Helpers    | -1.2787  | 4.86 | -0.26305 | 543         | 1.000  |
| Treatment  | -0.1  | Large      | Helpers | -         | Control   | 4          | Large   | Male       | -9.1272  | 4.86 | -1.87762 | 543         | 1.000  |
| Treatment  | -0.1  | Large      | Helpers | -         | Control   | 4          | Small   | Female     | -4.8772  | 4.86 | -1.00333 | 543         | 1.000  |
| Treatment  | -0.1  | Large      | Helpers | -         | Control   | 4          | Small   | Helpers    | 0.2130   | 4.86 | 0.04383  | 543         | 1.000  |
| Treatment  | -0.1  | Large      | Helpers | -         | Control   | 4          | Small   | Male       | -13.7106 | 4.86 | -2.82048 | 543         | 1.000  |
| Treatment  | -0.1  | Large      | Helpers | -         | Treatment | -0.1       | Large   | Female     | -12.3772 | 4.50 | -2.75310 | 554         | 1.000  |
| Treatment  | -0.1  | Large      | Helpers | -         | Treatment | -0.1       | Large   | Male       | -17.9397 | 4.50 | -3.99038 | 554         | 0.084  |
| Treatment  | -0.1  | Large      | Helpers | -         | Treatment | -0.1       | Small   | Female     | -3.4606  | 4.86 | -0.71189 | 543         | 1.000  |
| Treatment  | -0.1  | Large      | Helpers | -         | Treatment | -0.1       | Small   | Helpers    | -0.8564  | 4.86 | -0.17618 | 543         | 1.000  |
| Treatment  | -0.1  | Large      | Helpers | -         | Treatment | -0.1       | Small   | Male       | -9.8772  | 4.86 | -2.03191 | 543         | 1.000  |
| Treatment  | -0.1  | Large      | Helpers | -         | Treatment | 0.1        | Large   | Female     | -12.1272 | 4.50 | -2.69749 | 554         | 1.000  |
| Treatment  | -0.1  | Large      | Helpers | -         | Treatment | 0.1        | Large   | Helpers    | 0.4985   | 4.50 | 0.11089  | 554         | 1.000  |
| Treatment  | -0.1  | Large      | Helpers | -         | Treatment | 0.1        | Large   | Male       | -21.3772 | 4.50 | -4.75500 | 554         | 0.003  |
| Treatment  | -0.1  | Large      | Helpers | -         | Treatment | 0.1        | Small   | Female     | 8.2894   | 4.86 | 1.70527  | 543         | 1.000  |
| Treatment  | -0.1  | Large      | Helpers | -         | Treatment | 0.1        | Small   | Helpers    | 5.9978   | 4.86 | 1.23384  | 543         | 1.000  |
| Treatment  | -0.1  | Large      | Helpers | -         | Treatment | 0.1        | Small   | Male       | -43.7939 | 4.86 | -9.00911 | 543         | < .001 |
| Treatment  | -0.1  | Large      | Helpers | -         | Treatment | 24         | Large   | Female     | -9.3772  | 4.50 | -2.08580 | 554         | 1.000  |
| Treatment  | -0.1  | Large      | Helpers | -         | Treatment | 24         | Large   | Helpers    | 2.0941   | 4.50 | 0.46580  | 554         | 1.000  |
| Treatment  | -0.1  | Large      | Helpers | -         | Treatment | 24         | Large   | Male       | -37.4397 | 4.50 | -8.32782 | 554         | < .001 |
| Treatment  | -0.1  | Large      | Helpers | -         | Treatment | 24         | Small   | Female     | -0.6272  | 4.86 | -0.12903 | 543         | 1.000  |
| Treatment  | -0.1  | Large      | Helpers | -         | Treatment | 24         | Small   | Helpers    | 3.3728   | 4.86 | 0.69383  | 543         | 1.000  |
| Treatment  | -0.1  | Large      | Helpers | -         | Treatment | 24         | Small   | Male       | -23.0439 | 4.86 | -4.74050 | 543         | 0.003  |
| Treatment  | -0.1  | Large      | Helpers | -         | Treatment | 4          | Large   | Female     | 3.6853   | 4.50 | 0.81972  | 554         | 1.000  |
| Treatment  | -0.1  | Large      | Helpers | -         | Treatment | 4          | Large   | Helpers    | 1.0097   | 4.50 | 0.22458  | 554         | 1.000  |
| Treatment  | -0.1  | Large      | Helpers | -         | Treatment | 4          | Large   | Male       | -41.6272 | 4.50 | -9.25926 | 554         | < .001 |
| Treatment  | -0.1  | Large      | Helpers | -         | Treatment | 4          | Small   | Female     | 1.0394   | 4.86 | 0.21383  | 543         | 1.000  |
| Treatment  | -0.1  | Large      | Helpers | -         | Treatment | 4          | Small   | Helpers    | 1.6853   | 4.86 | 0.34669  | 543         | 1.000  |
| Treatment  | -0.1  | Large      | Helpers | -         | Treatment | 4          | Small   | Male       | -20.8772 | 4.86 | -4.29478 | 543         | 0.023  |
| Treatment  | -0.1  | Large      | Male    | -         | Control   | -0.1       | Small   | Male       | 4.0625   | 4.86 | 0.83572  | 543         | 1.000  |
| Treatment  | -0.1  | Large      | Male    | -         | Control   | 0.1        | Large   | Male       | 5.1458   | 4.86 | 1.05858  | 543         | 1.000  |
| Treatment  | -0.1  | Large      | Male    | -         | Control   | 0.1        | Small   | Male       | -2.5208  | 4.86 | -0.51858 | 543         | 1.000  |
| Treatment  | -0.1  | Large      | Male    | -         | Control   | 24         | Large   | Male       | 8.8958   | 4.86 | 1.83002  | 543         | 1.000  |
| Treatment  | -0.1  | Large      | Male    | -         | Control   | 24         | Small   | Male       | 2.7292   | 4.86 | 0.56143  | 543         | 1.000  |
| Treatment  | -0.1  | Large      | Male    | -         | Control   | 4          | Large   | Male       | 8.8125   | 4.86 | 1.81287  | 543         | 1.000  |
| Treatment  | -0.1  | Large      | Male    | -         | Control   | 4          | Small   | Male       | 4.2292   | 4.86 | 0.87001  | 543         | 1.000  |

Post Hoc Comparisons - Treatment \* Hours \* Group Size \* Subject

| Comparison |       |            |         |           |           |            |         |            |          |      |          |             |        |
|------------|-------|------------|---------|-----------|-----------|------------|---------|------------|----------|------|----------|-------------|--------|
| Treatment  | Hours | Group Size | Subject | Treatment | Hours     | Group Size | Subject | Difference | SE       | t    | df       | Pbonferroni |        |
| Treatment  | -0.1  | Large      | Male    | -         | Treatment | -0.1       | Small   | Male       | 8.0625   | 4.86 | 1.65859  | 543         | 1.000  |
| Treatment  | -0.1  | Large      | Male    | -         | Treatment | 0.1        | Large   | Male       | -3.4375  | 4.50 | -0.76461 | 554         | 1.000  |
| Treatment  | -0.1  | Large      | Male    | -         | Treatment | 0.1        | Small   | Male       | -25.8542 | 4.86 | -5.31862 | 543         | < .001 |
| Treatment  | -0.1  | Large      | Male    | -         | Treatment | 24         | Large   | Male       | -19.5000 | 4.50 | -4.33744 | 554         | 0.019  |
| Treatment  | -0.1  | Large      | Male    | -         | Treatment | 24         | Small   | Male       | -5.1042  | 4.86 | -1.05001 | 543         | 1.000  |
| Treatment  | -0.1  | Large      | Male    | -         | Treatment | 4          | Large   | Male       | -23.6875 | 4.50 | -5.26888 | 554         | < .001 |
| Treatment  | -0.1  | Large      | Male    | -         | Treatment | 4          | Small   | Male       | -2.9375  | 4.86 | -0.60429 | 543         | 1.000  |
| Treatment  | -0.1  | Small      | Female  | -         | Control   | -0.1       | Large   | Male       | -8.1667  | 5.20 | -1.57151 | 543         | 1.000  |
| Treatment  | -0.1  | Small      | Female  | -         | Control   | -0.1       | Small   | Male       | -10.4167 | 5.20 | -2.00448 | 543         | 1.000  |
| Treatment  | -0.1  | Small      | Female  | -         | Control   | 0.1        | Large   | Male       | -9.3333  | 5.20 | -1.79601 | 543         | 1.000  |
| Treatment  | -0.1  | Small      | Female  | -         | Control   | 0.1        | Small   | Female     | -3.2500  | 5.20 | -0.62540 | 543         | 1.000  |
| Treatment  | -0.1  | Small      | Female  | -         | Control   | 0.1        | Small   | Male       | -17.0000 | 5.20 | -3.27131 | 543         | 1.000  |
| Treatment  | -0.1  | Small      | Female  | -         | Control   | 24         | Large   | Male       | -5.5833  | 5.20 | -1.07440 | 543         | 1.000  |
| Treatment  | -0.1  | Small      | Female  | -         | Control   | 24         | Small   | Female     | -1.3333  | 5.20 | -0.25657 | 543         | 1.000  |
| Treatment  | -0.1  | Small      | Female  | -         | Control   | 24         | Small   | Male       | -11.7500 | 5.20 | -2.26105 | 543         | 1.000  |
| Treatment  | -0.1  | Small      | Female  | -         | Control   | 4          | Large   | Male       | -5.6667  | 5.20 | -1.09044 | 543         | 1.000  |
| Treatment  | -0.1  | Small      | Female  | -         | Control   | 4          | Small   | Female     | -1.4167  | 5.20 | -0.27261 | 543         | 1.000  |
| Treatment  | -0.1  | Small      | Female  | -         | Control   | 4          | Small   | Male       | -10.2500 | 5.20 | -1.97241 | 543         | 1.000  |
| Treatment  | -0.1  | Small      | Female  | -         | Treatment | -0.1       | Large   | Male       | -14.4792 | 4.86 | -2.97860 | 543         | 1.000  |
| Treatment  | -0.1  | Small      | Female  | -         | Treatment | -0.1       | Small   | Male       | -6.4167  | 5.19 | -1.23606 | 554         | 1.000  |
| Treatment  | -0.1  | Small      | Female  | -         | Treatment | 0.1        | Large   | Male       | -17.9167 | 4.86 | -3.68575 | 543         | 0.283  |
| Treatment  | -0.1  | Small      | Female  | -         | Treatment | 0.1        | Small   | Female     | 11.7500  | 5.19 | 2.26343  | 554         | 1.000  |
| Treatment  | -0.1  | Small      | Female  | -         | Treatment | 0.1        | Small   | Male       | -40.3333 | 5.19 | -7.76951 | 554         | < .001 |
| Treatment  | -0.1  | Small      | Female  | -         | Treatment | 24         | Large   | Male       | -33.9792 | 4.86 | -6.99006 | 543         | < .001 |
| Treatment  | -0.1  | Small      | Female  | -         | Treatment | 24         | Small   | Female     | 2.8333   | 5.19 | 0.54579  | 554         | 1.000  |
| Treatment  | -0.1  | Small      | Female  | -         | Treatment | 24         | Small   | Male       | -19.5833 | 5.19 | -3.77238 | 554         | 0.202  |
| Treatment  | -0.1  | Small      | Female  | -         | Treatment | 4          | Large   | Male       | -38.1667 | 4.86 | -7.85150 | 543         | < .001 |
| Treatment  | -0.1  | Small      | Female  | -         | Treatment | 4          | Small   | Female     | 4.5000   | 5.19 | 0.86685  | 554         | 1.000  |
| Treatment  | -0.1  | Small      | Female  | -         | Treatment | 4          | Small   | Male       | -17.4167 | 5.19 | -3.35501 | 554         | 0.956  |
| Treatment  | -0.1  | Small      | Helpers | -         | Control   | -0.1       | Large   | Female     | -7.6875  | 5.20 | -1.47930 | 543         | 1.000  |
| Treatment  | -0.1  | Small      | Helpers | -         | Control   | -0.1       | Large   | Male       | -10.7708 | 5.20 | -2.07263 | 543         | 1.000  |
| Treatment  | -0.1  | Small      | Helpers | -         | Control   | -0.1       | Small   | Female     | -3.1875  | 5.20 | -0.61337 | 543         | 1.000  |
| Treatment  | -0.1  | Small      | Helpers | -         | Control   | -0.1       | Small   | Male       | -13.0208 | 5.20 | -2.50560 | 543         | 1.000  |
| Treatment  | -0.1  | Small      | Helpers | -         | Control   | 0.1        | Large   | Female     | -12.6875 | 5.20 | -2.44145 | 543         | 1.000  |
| Treatment  | -0.1  | Small      | Helpers | -         | Control   | 0.1        | Large   | Male       | -11.9375 | 5.20 | -2.29713 | 543         | 1.000  |
| Treatment  | -0.1  | Small      | Helpers | -         | Control   | 0.1        | Small   | Female     | -5.8542  | 5.20 | -1.12652 | 543         | 1.000  |
| Treatment  | -0.1  | Small      | Helpers | -         | Control   | 0.1        | Small   | Helpers    | 3.3750   | 5.20 | 0.64945  | 543         | 1.000  |
| Treatment  | -0.1  | Small      | Helpers | -         | Control   | 0.1        | Small   | Male       | -19.6042 | 5.20 | -3.77243 | 543         | 0.202  |
| Treatment  | -0.1  | Small      | Helpers | -         | Control   | 24         | Large   | Female     | -9.7708  | 5.20 | -1.88020 | 543         | 1.000  |
| Treatment  | -0.1  | Small      | Helpers | -         | Control   | 24         | Large   | Male       | -8.1875  | 5.20 | -1.57552 | 543         | 1.000  |
| Treatment  | -0.1  | Small      | Helpers | -         | Control   | 24         | Small   | Female     | -3.9375  | 5.20 | -0.75769 | 543         | 1.000  |
| Treatment  | -0.1  | Small      | Helpers | -         | Control   | 24         | Small   | Helpers    | 1.4444   | 5.20 | 0.27795  | 543         | 1.000  |
| Treatment  | -0.1  | Small      | Helpers | -         | Control   | 24         | Small   | Male       | -14.3542 | 5.20 | -2.76217 | 543         | 1.000  |
| Treatment  | -0.1  | Small      | Helpers | -         | Control   | 4          | Large   | Female     | -8.9375  | 5.20 | -1.71984 | 543         | 1.000  |
| Treatment  | -0.1  | Small      | Helpers | -         | Control   | 4          | Large   | Male       | -8.2708  | 5.20 | -1.59155 | 543         | 1.000  |
| Treatment  | -0.1  | Small      | Helpers | -         | Control   | 4          | Small   | Female     | -4.0208  | 5.20 | -0.77373 | 543         | 1.000  |
| Treatment  | -0.1  | Small      | Helpers | -         | Control   | 4          | Small   | Helpers    | 1.0694   | 5.20 | 0.20579  | 543         | 1.000  |
| Treatment  | -0.1  | Small      | Helpers | -         | Control   | 4          | Small   | Male       | -12.8542 | 5.20 | -2.47353 | 543         | 1.000  |
| Treatment  | -0.1  | Small      | Helpers | -         | Treatment | -0.1       | Large   | Female     | -11.5208 | 4.86 | -2.37002 | 543         | 1.000  |
| Treatment  | -0.1  | Small      | Helpers | -         | Treatment | -0.1       | Large   | Male       | -17.0833 | 4.86 | -3.51432 | 543         | 0.539  |
| Treatment  | -0.1  | Small      | Helpers | -         | Treatment | -0.1       | Small   | Female     | -2.6042  | 5.19 | -0.50165 | 554         | 1.000  |
| Treatment  | -0.1  | Small      | Helpers | -         | Treatment | -0.1       | Small   | Male       | -9.0208  | 5.19 | -1.73770 | 554         | 1.000  |
| Treatment  | -0.1  | Small      | Helpers | -         | Treatment | 0.1        | Large   | Female     | -11.2708 | 4.86 | -2.31859 | 543         | 1.000  |
| Treatment  | -0.1  | Small      | Helpers | -         | Treatment | 0.1        | Large   | Male       | -20.5208 | 4.86 | -4.22147 | 543         | 0.032  |
| Treatment  | -0.1  | Small      | Helpers | -         | Treatment | 0.1        | Small   | Female     | 9.1458   | 5.19 | 1.76178  | 554         | 1.000  |
| Treatment  | -0.1  | Small      | Helpers | -         | Treatment | 0.1        | Small   | Helpers    | 6.8542   | 5.19 | 1.32033  | 554         | 1.000  |
| Treatment  | -0.1  | Small      | Helpers | -         | Treatment | 0.1        | Small   | Male       | -42.9375 | 5.19 | -8.27115 | 554         | < .001 |
| Treatment  | -0.1  | Small      | Helpers | -         | Treatment | 24         | Large   | Female     | -8.5208  | 4.86 | -1.75287 | 543         | 1.000  |
| Treatment  | -0.1  | Small      | Helpers | -         | Treatment | 24         | Large   | Male       | -36.5833 | 4.86 | -7.52578 | 543         | < .001 |
| Treatment  | -0.1  | Small      | Helpers | -         | Treatment | 24         | Small   | Female     | 0.2292   | 5.19 | 0.04414  | 554         | 1.000  |

Post Hoc Comparisons - Treatment \* Hours \* Group Size \* Subject

| Comparison |       |            |         |             |       |            |         |            |      |          |     |             |
|------------|-------|------------|---------|-------------|-------|------------|---------|------------|------|----------|-----|-------------|
| Treatment  | Hours | Group Size | Subject | Treatment   | Hours | Group Size | Subject | Difference | SE   | t        | df  | Pbonferroni |
| Treatment  | -0.1  | Small      | Helpers | - Treatment | 24    | Small      | Helpers | 4.2292     | 5.19 | 0.81467  | 554 | 1.000       |
| Treatment  | -0.1  | Small      | Helpers | - Treatment | 24    | Small      | Male    | -22.1875   | 5.19 | -4.27403 | 554 | 0.025       |
| Treatment  | -0.1  | Small      | Helpers | - Treatment | 4     | Large      | Female  | 4.5417     | 4.86 | 0.93429  | 543 | 1.000       |
| Treatment  | -0.1  | Small      | Helpers | - Treatment | 4     | Large      | Male    | -40.7708   | 4.86 | -8.38722 | 543 | < .001      |
| Treatment  | -0.1  | Small      | Helpers | - Treatment | 4     | Small      | Female  | 1.8958     | 5.19 | 0.36520  | 554 | 1.000       |
| Treatment  | -0.1  | Small      | Helpers | - Treatment | 4     | Small      | Helpers | 2.5417     | 5.19 | 0.48961  | 554 | 1.000       |
| Treatment  | -0.1  | Small      | Helpers | - Treatment | 4     | Small      | Male    | -20.0208   | 5.19 | -3.85666 | 554 | 0.145       |
| Treatment  | -0.1  | Small      | Male    | - Control   | 0.1   | Small      | Male    | -10.5833   | 5.20 | -2.03655 | 543 | 1.000       |
| Treatment  | -0.1  | Small      | Male    | - Control   | 24    | Small      | Male    | -5.3333    | 5.20 | -1.02629 | 543 | 1.000       |
| Treatment  | -0.1  | Small      | Male    | - Control   | 4     | Small      | Male    | -3.8333    | 5.20 | -0.73765 | 543 | 1.000       |
| Treatment  | -0.1  | Small      | Male    | - Treatment | 0.1   | Small      | Male    | -33.9167   | 5.19 | -6.53345 | 554 | < .001      |
| Treatment  | -0.1  | Small      | Male    | - Treatment | 24    | Small      | Male    | -13.1667   | 5.19 | -2.53633 | 554 | 1.000       |
| Treatment  | -0.1  | Small      | Male    | - Treatment | 4     | Small      | Male    | -11.0000   | 5.19 | -2.11896 | 554 | 1.000       |
| Treatment  | 0.1   | Large      | Female  | - Control   | -0.1  | Large      | Male    | 0.5000     | 4.86 | 0.10286  | 543 | 1.000       |
| Treatment  | 0.1   | Large      | Female  | - Control   | -0.1  | Small      | Female  | 8.0833     | 4.86 | 1.66287  | 543 | 1.000       |
| Treatment  | 0.1   | Large      | Female  | - Control   | -0.1  | Small      | Male    | -1.7500    | 4.86 | -0.36000 | 543 | 1.000       |
| Treatment  | 0.1   | Large      | Female  | - Control   | 0.1   | Large      | Male    | -0.6667    | 4.86 | -0.13714 | 543 | 1.000       |
| Treatment  | 0.1   | Large      | Female  | - Control   | 0.1   | Small      | Female  | 5.4167     | 4.86 | 1.11430  | 543 | 1.000       |
| Treatment  | 0.1   | Large      | Female  | - Control   | 0.1   | Small      | Male    | -8.3333    | 4.86 | -1.71430 | 543 | 1.000       |
| Treatment  | 0.1   | Large      | Female  | - Control   | 24    | Large      | Female  | 1.5000     | 4.86 | 0.30857  | 543 | 1.000       |
| Treatment  | 0.1   | Large      | Female  | - Control   | 24    | Large      | Male    | 3.0833     | 4.86 | 0.63429  | 543 | 1.000       |
| Treatment  | 0.1   | Large      | Female  | - Control   | 24    | Small      | Female  | 7.3333     | 4.86 | 1.50858  | 543 | 1.000       |
| Treatment  | 0.1   | Large      | Female  | - Control   | 24    | Small      | Male    | -3.0833    | 4.86 | -0.63429 | 543 | 1.000       |
| Treatment  | 0.1   | Large      | Female  | - Control   | 4     | Large      | Female  | 2.3333     | 4.86 | 0.48000  | 543 | 1.000       |
| Treatment  | 0.1   | Large      | Female  | - Control   | 4     | Large      | Male    | 3.0000     | 4.86 | 0.61715  | 543 | 1.000       |
| Treatment  | 0.1   | Large      | Female  | - Control   | 4     | Small      | Female  | 7.2500     | 4.86 | 1.49144  | 543 | 1.000       |
| Treatment  | 0.1   | Large      | Female  | - Control   | 4     | Small      | Male    | -1.5833    | 4.86 | -0.32572 | 543 | 1.000       |
| Treatment  | 0.1   | Large      | Female  | - Treatment | -0.1  | Large      | Male    | -5.8125    | 4.50 | -1.29289 | 554 | 1.000       |
| Treatment  | 0.1   | Large      | Female  | - Treatment | -0.1  | Small      | Female  | 8.6667     | 4.86 | 1.78287  | 543 | 1.000       |
| Treatment  | 0.1   | Large      | Female  | - Treatment | -0.1  | Small      | Male    | 2.2500     | 4.86 | 0.46286  | 543 | 1.000       |
| Treatment  | 0.1   | Large      | Female  | - Treatment | 0.1   | Large      | Male    | -9.2500    | 4.50 | -2.05750 | 554 | 1.000       |
| Treatment  | 0.1   | Large      | Female  | - Treatment | 0.1   | Small      | Female  | 20.4167    | 4.86 | 4.20004  | 543 | 0.035       |
| Treatment  | 0.1   | Large      | Female  | - Treatment | 0.1   | Small      | Male    | -31.6667   | 4.86 | -6.51434 | 543 | < .001      |
| Treatment  | 0.1   | Large      | Female  | - Treatment | 24    | Large      | Female  | 2.7500     | 4.50 | 0.61169  | 554 | 1.000       |
| Treatment  | 0.1   | Large      | Female  | - Treatment | 24    | Large      | Male    | -25.3125   | 4.50 | -5.63033 | 554 | < .001      |
| Treatment  | 0.1   | Large      | Female  | - Treatment | 24    | Small      | Female  | 11.5000    | 4.86 | 2.36574  | 543 | 1.000       |
| Treatment  | 0.1   | Large      | Female  | - Treatment | 24    | Small      | Male    | -10.9167   | 4.86 | -2.24573 | 543 | 1.000       |
| Treatment  | 0.1   | Large      | Female  | - Treatment | 4     | Large      | Female  | 15.8125    | 4.50 | 3.51722  | 554 | 0.532       |
| Treatment  | 0.1   | Large      | Female  | - Treatment | 4     | Large      | Male    | -29.5000   | 4.50 | -6.56177 | 554 | < .001      |
| Treatment  | 0.1   | Large      | Female  | - Treatment | 4     | Small      | Female  | 13.1667    | 4.86 | 2.70860  | 543 | 1.000       |
| Treatment  | 0.1   | Large      | Female  | - Treatment | 4     | Small      | Male    | -8.7500    | 4.86 | -1.80002 | 543 | 1.000       |
| Treatment  | 0.1   | Large      | Helpers | - Control   | -0.1  | Large      | Female  | -9.0424    | 4.86 | -1.86017 | 543 | 1.000       |
| Treatment  | 0.1   | Large      | Helpers | - Control   | -0.1  | Large      | Male    | -12.1257   | 4.86 | -2.49446 | 543 | 1.000       |
| Treatment  | 0.1   | Large      | Helpers | - Control   | -0.1  | Small      | Female  | -4.5424    | 4.86 | -0.93445 | 543 | 1.000       |
| Treatment  | 0.1   | Large      | Helpers | - Control   | -0.1  | Small      | Helpers | -0.4730    | 4.86 | -0.09730 | 543 | 1.000       |
| Treatment  | 0.1   | Large      | Helpers | - Control   | -0.1  | Small      | Male    | -14.3757   | 4.86 | -2.95732 | 543 | 1.000       |
| Treatment  | 0.1   | Large      | Helpers | - Control   | 0.1   | Large      | Female  | -14.0424   | 4.86 | -2.88875 | 543 | 1.000       |
| Treatment  | 0.1   | Large      | Helpers | - Control   | 0.1   | Large      | Male    | -13.2924   | 4.86 | -2.73446 | 543 | 1.000       |
| Treatment  | 0.1   | Large      | Helpers | - Control   | 0.1   | Small      | Female  | -7.2091    | 4.86 | -1.48302 | 543 | 1.000       |
| Treatment  | 0.1   | Large      | Helpers | - Control   | 0.1   | Small      | Helpers | 2.0201     | 4.86 | 0.41556  | 543 | 1.000       |
| Treatment  | 0.1   | Large      | Helpers | - Control   | 0.1   | Small      | Male    | -20.9591   | 4.86 | -4.31162 | 543 | 0.022       |
| Treatment  | 0.1   | Large      | Helpers | - Control   | 24    | Large      | Female  | -11.1257   | 4.86 | -2.28875 | 543 | 1.000       |
| Treatment  | 0.1   | Large      | Helpers | - Control   | 24    | Large      | Helpers | -1.6978    | 4.86 | -0.34926 | 543 | 1.000       |
| Treatment  | 0.1   | Large      | Helpers | - Control   | 24    | Large      | Male    | -9.5424    | 4.86 | -1.96303 | 543 | 1.000       |
| Treatment  | 0.1   | Large      | Helpers | - Control   | 24    | Small      | Female  | -5.2924    | 4.86 | -1.08873 | 543 | 1.000       |
| Treatment  | 0.1   | Large      | Helpers | - Control   | 24    | Small      | Helpers | 0.0895     | 4.86 | 0.01842  | 543 | 1.000       |
| Treatment  | 0.1   | Large      | Helpers | - Control   | 24    | Small      | Male    | -15.7091   | 4.86 | -3.23161 | 543 | 1.000       |
| Treatment  | 0.1   | Large      | Helpers | - Control   | 4     | Large      | Female  | -10.2924   | 4.86 | -2.11731 | 543 | 1.000       |
| Treatment  | 0.1   | Large      | Helpers | - Control   | 4     | Large      | Helpers | -1.7772    | 4.86 | -0.36561 | 543 | 1.000       |
| Treatment  | 0.1   | Large      | Helpers | - Control   | 4     | Large      | Male    | -9.6257    | 4.86 | -1.98017 | 543 | 1.000       |

## Post Hoc Comparisons - Treatment \* Hours \* Group Size \* Subject

| Comparison |       |            |         |             |       |            |         |            |      |           |     |             |
|------------|-------|------------|---------|-------------|-------|------------|---------|------------|------|-----------|-----|-------------|
| Treatment  | Hours | Group Size | Subject | Treatment   | Hours | Group Size | Subject | Difference | SE   | t         | df  | Pbonferroni |
| Treatment  | 0.1   | Large      | Helpers | - Control   | 4     | Small      | Female  | -5.3757    | 4.86 | -1.10588  | 543 | 1.000       |
| Treatment  | 0.1   | Large      | Helpers | - Control   | 4     | Small      | Helpers | -0.2855    | 4.86 | -0.05873  | 543 | 1.000       |
| Treatment  | 0.1   | Large      | Helpers | - Control   | 4     | Small      | Male    | -14.2091   | 4.86 | -2.92304  | 543 | 1.000       |
| Treatment  | 0.1   | Large      | Helpers | - Treatment | -0.1  | Large      | Female  | -12.8757   | 4.50 | -2.86399  | 554 | 1.000       |
| Treatment  | 0.1   | Large      | Helpers | - Treatment | -0.1  | Large      | Male    | -18.4382   | 4.50 | -4.10127  | 554 | 0.053       |
| Treatment  | 0.1   | Large      | Helpers | - Treatment | -0.1  | Small      | Female  | -3.9591    | 4.86 | -0.81445  | 543 | 1.000       |
| Treatment  | 0.1   | Large      | Helpers | - Treatment | -0.1  | Small      | Helpers | -1.3549    | 4.86 | -0.27873  | 543 | 1.000       |
| Treatment  | 0.1   | Large      | Helpers | - Treatment | -0.1  | Small      | Male    | -10.3757   | 4.86 | -2.13446  | 543 | 1.000       |
| Treatment  | 0.1   | Large      | Helpers | - Treatment | 0.1   | Large      | Female  | -12.6257   | 4.50 | -2.80838  | 554 | 1.000       |
| Treatment  | 0.1   | Large      | Helpers | - Treatment | 0.1   | Large      | Male    | -21.8757   | 4.50 | -4.86588  | 554 | 0.002       |
| Treatment  | 0.1   | Large      | Helpers | - Treatment | 0.1   | Small      | Female  | 7.7909     | 4.86 | 1.60272   | 543 | 1.000       |
| Treatment  | 0.1   | Large      | Helpers | - Treatment | 0.1   | Small      | Helpers | 5.4993     | 4.86 | 1.13129   | 543 | 1.000       |
| Treatment  | 0.1   | Large      | Helpers | - Treatment | 0.1   | Small      | Male    | -44.2924   | 4.86 | -9.11166  | 543 | < .001      |
| Treatment  | 0.1   | Large      | Helpers | - Treatment | 24    | Large      | Female  | -9.8757    | 4.50 | -2.19669  | 554 | 1.000       |
| Treatment  | 0.1   | Large      | Helpers | - Treatment | 24    | Large      | Helpers | 1.5956     | 4.50 | 0.35492   | 554 | 1.000       |
| Treatment  | 0.1   | Large      | Helpers | - Treatment | 24    | Large      | Male    | -37.9382   | 4.50 | -8.43871  | 554 | < .001      |
| Treatment  | 0.1   | Large      | Helpers | - Treatment | 24    | Small      | Female  | -1.1257    | 4.86 | -0.23158  | 543 | 1.000       |
| Treatment  | 0.1   | Large      | Helpers | - Treatment | 24    | Small      | Helpers | 2.8743     | 4.86 | 0.59128   | 543 | 1.000       |
| Treatment  | 0.1   | Large      | Helpers | - Treatment | 24    | Small      | Male    | -23.5424   | 4.86 | -4.84305  | 543 | 0.002       |
| Treatment  | 0.1   | Large      | Helpers | - Treatment | 4     | Large      | Female  | 3.1868     | 4.50 | 0.70884   | 554 | 1.000       |
| Treatment  | 0.1   | Large      | Helpers | - Treatment | 4     | Large      | Helpers | 0.5112     | 4.50 | 0.11370   | 554 | 1.000       |
| Treatment  | 0.1   | Large      | Helpers | - Treatment | 4     | Large      | Male    | -42.1257   | 4.50 | -9.37014  | 554 | < .001      |
| Treatment  | 0.1   | Large      | Helpers | - Treatment | 4     | Small      | Female  | 0.5409     | 4.86 | 0.11128   | 543 | 1.000       |
| Treatment  | 0.1   | Large      | Helpers | - Treatment | 4     | Small      | Helpers | 1.1868     | 4.86 | 0.24413   | 543 | 1.000       |
| Treatment  | 0.1   | Large      | Helpers | - Treatment | 4     | Small      | Male    | -21.3757   | 4.86 | -4.39734  | 543 | 0.015       |
| Treatment  | 0.1   | Large      | Male    | - Control   | -0.1  | Small      | Male    | 7.5000     | 4.86 | 1.54287   | 543 | 1.000       |
| Treatment  | 0.1   | Large      | Male    | - Control   | 0.1   | Small      | Male    | 0.9167     | 4.86 | 0.18857   | 543 | 1.000       |
| Treatment  | 0.1   | Large      | Male    | - Control   | 24    | Large      | Male    | 12.3333    | 4.86 | 2.53717   | 543 | 1.000       |
| Treatment  | 0.1   | Large      | Male    | - Control   | 24    | Small      | Male    | 6.1667     | 4.86 | 1.26858   | 543 | 1.000       |
| Treatment  | 0.1   | Large      | Male    | - Control   | 4     | Large      | Male    | 12.2500    | 4.86 | 2.52002   | 543 | 1.000       |
| Treatment  | 0.1   | Large      | Male    | - Control   | 4     | Small      | Male    | 7.6667     | 4.86 | 1.57716   | 543 | 1.000       |
| Treatment  | 0.1   | Large      | Male    | - Treatment | -0.1  | Small      | Male    | 11.5000    | 4.86 | 2.36574   | 543 | 1.000       |
| Treatment  | 0.1   | Large      | Male    | - Treatment | 0.1   | Small      | Male    | -22.4167   | 4.86 | -4.61147  | 543 | 0.006       |
| Treatment  | 0.1   | Large      | Male    | - Treatment | 24    | Large      | Male    | -16.0625   | 4.50 | -3.57283  | 554 | 0.433       |
| Treatment  | 0.1   | Large      | Male    | - Treatment | 24    | Small      | Male    | -1.6667    | 4.86 | -0.34286  | 543 | 1.000       |
| Treatment  | 0.1   | Large      | Male    | - Treatment | 4     | Large      | Male    | -20.2500   | 4.50 | -4.50426  | 554 | 0.009       |
| Treatment  | 0.1   | Large      | Male    | - Treatment | 4     | Small      | Male    | 0.5000     | 4.86 | 0.10286   | 543 | 1.000       |
| Treatment  | 0.1   | Small      | Female  | - Control   | -0.1  | Large      | Male    | -19.9167   | 5.20 | -3.83256  | 543 | 0.160       |
| Treatment  | 0.1   | Small      | Female  | - Control   | -0.1  | Small      | Male    | -22.1667   | 5.20 | -4.26553  | 543 | 0.027       |
| Treatment  | 0.1   | Small      | Female  | - Control   | 0.1   | Large      | Male    | -21.0833   | 5.20 | -4.05706  | 543 | 0.064       |
| Treatment  | 0.1   | Small      | Female  | - Control   | 0.1   | Small      | Male    | -28.7500   | 5.20 | -5.53236  | 543 | < .001      |
| Treatment  | 0.1   | Small      | Female  | - Control   | 24    | Large      | Male    | -17.3333   | 5.20 | -3.33545  | 543 | 1.000       |
| Treatment  | 0.1   | Small      | Female  | - Control   | 24    | Small      | Female  | -13.0833   | 5.20 | -2.51762  | 543 | 1.000       |
| Treatment  | 0.1   | Small      | Female  | - Control   | 24    | Small      | Male    | -23.5000   | 5.20 | -4.52210  | 543 | 0.008       |
| Treatment  | 0.1   | Small      | Female  | - Control   | 4     | Large      | Male    | -17.4167   | 5.20 | -3.35149  | 543 | 0.970       |
| Treatment  | 0.1   | Small      | Female  | - Control   | 4     | Small      | Female  | -13.1667   | 5.20 | -2.53366  | 543 | 1.000       |
| Treatment  | 0.1   | Small      | Female  | - Control   | 4     | Small      | Male    | -22.0000   | 5.20 | -4.23346  | 543 | 0.030       |
| Treatment  | 0.1   | Small      | Female  | - Treatment | -0.1  | Large      | Male    | -26.2292   | 4.86 | -5.39576  | 543 | < .001      |
| Treatment  | 0.1   | Small      | Female  | - Treatment | -0.1  | Small      | Male    | -18.1667   | 5.19 | -3.49949  | 554 | 0.568       |
| Treatment  | 0.1   | Small      | Female  | - Treatment | 0.1   | Large      | Male    | -29.6667   | 4.86 | -6.10291  | 543 | < .001      |
| Treatment  | 0.1   | Small      | Female  | - Treatment | 0.1   | Small      | Male    | -52.0833   | 5.19 | -10.03294 | 554 | < .001      |
| Treatment  | 0.1   | Small      | Female  | - Treatment | 24    | Large      | Male    | -45.7292   | 4.86 | -9.40723  | 543 | < .001      |
| Treatment  | 0.1   | Small      | Female  | - Treatment | 24    | Small      | Female  | -8.9167    | 5.19 | -1.71764  | 554 | 1.000       |
| Treatment  | 0.1   | Small      | Female  | - Treatment | 24    | Small      | Male    | -31.3333   | 5.19 | -6.03581  | 554 | < .001      |
| Treatment  | 0.1   | Small      | Female  | - Treatment | 4     | Large      | Male    | -49.9167   | 4.86 | -10.26866 | 543 | < .001      |
| Treatment  | 0.1   | Small      | Female  | - Treatment | 4     | Small      | Female  | -7.2500    | 5.19 | -1.39658  | 554 | 1.000       |
| Treatment  | 0.1   | Small      | Female  | - Treatment | 4     | Small      | Male    | -29.1667   | 5.19 | -5.61844  | 554 | < .001      |
| Treatment  | 0.1   | Small      | Helpers | - Control   | -0.1  | Large      | Female  | -14.5417   | 5.20 | -2.79825  | 543 | 1.000       |
| Treatment  | 0.1   | Small      | Helpers | - Control   | -0.1  | Large      | Male    | -17.6250   | 5.20 | -3.39158  | 543 | 0.841       |
| Treatment  | 0.1   | Small      | Helpers | - Control   | -0.1  | Small      | Female  | -10.0417   | 5.20 | -1.93232  | 543 | 1.000       |

## Post Hoc Comparisons - Treatment \* Hours \* Group Size \* Subject

| Comparison |       |            |         |             |       |            |         |            |      |          |     |             |
|------------|-------|------------|---------|-------------|-------|------------|---------|------------|------|----------|-----|-------------|
| Treatment  | Hours | Group Size | Subject | Treatment   | Hours | Group Size | Subject | Difference | SE   | t        | df  | Pbonferroni |
| Treatment  | 0.1   | Small      | Helpers | - Control   | -0.1  | Small      | Male    | -19.8750   | 5.20 | -3.82454 | 543 | 0.165       |
| Treatment  | 0.1   | Small      | Helpers | - Control   | 0.1   | Large      | Female  | -19.5417   | 5.20 | -3.76040 | 543 | 0.212       |
| Treatment  | 0.1   | Small      | Helpers | - Control   | 0.1   | Large      | Male    | -18.7917   | 5.20 | -3.61608 | 543 | 0.369       |
| Treatment  | 0.1   | Small      | Helpers | - Control   | 0.1   | Small      | Female  | -12.7083   | 5.20 | -2.44546 | 543 | 1.000       |
| Treatment  | 0.1   | Small      | Helpers | - Control   | 0.1   | Small      | Male    | -26.4583   | 5.20 | -5.09137 | 543 | < .001      |
| Treatment  | 0.1   | Small      | Helpers | - Control   | 24    | Large      | Female  | -16.6250   | 5.20 | -3.19915 | 543 | 1.000       |
| Treatment  | 0.1   | Small      | Helpers | - Control   | 24    | Large      | Male    | -15.0417   | 5.20 | -2.89447 | 543 | 1.000       |
| Treatment  | 0.1   | Small      | Helpers | - Control   | 24    | Small      | Female  | -10.7917   | 5.20 | -2.07664 | 543 | 1.000       |
| Treatment  | 0.1   | Small      | Helpers | - Control   | 24    | Small      | Helpers | -5.4097    | 5.20 | -1.04099 | 543 | 1.000       |
| Treatment  | 0.1   | Small      | Helpers | - Control   | 24    | Small      | Male    | -21.2083   | 5.20 | -4.08112 | 543 | 0.058       |
| Treatment  | 0.1   | Small      | Helpers | - Control   | 4     | Large      | Female  | -15.7917   | 5.20 | -3.03879 | 543 | 1.000       |
| Treatment  | 0.1   | Small      | Helpers | - Control   | 4     | Large      | Male    | -15.1250   | 5.20 | -2.91050 | 543 | 1.000       |
| Treatment  | 0.1   | Small      | Helpers | - Control   | 4     | Small      | Female  | -10.8750   | 5.20 | -2.09267 | 543 | 1.000       |
| Treatment  | 0.1   | Small      | Helpers | - Control   | 4     | Small      | Helpers | -5.7847    | 5.20 | -1.11315 | 543 | 1.000       |
| Treatment  | 0.1   | Small      | Helpers | - Control   | 4     | Small      | Male    | -19.7083   | 5.20 | -3.79247 | 543 | 0.187       |
| Treatment  | 0.1   | Small      | Helpers | - Treatment | -0.1  | Large      | Female  | -18.3750   | 4.86 | -3.78003 | 543 | 0.196       |
| Treatment  | 0.1   | Small      | Helpers | - Treatment | -0.1  | Large      | Male    | -23.9375   | 4.86 | -4.92433 | 543 | 0.001       |
| Treatment  | 0.1   | Small      | Helpers | - Treatment | -0.1  | Small      | Female  | -9.4583    | 5.19 | -1.82198 | 554 | 1.000       |
| Treatment  | 0.1   | Small      | Helpers | - Treatment | -0.1  | Small      | Male    | -15.8750   | 5.19 | -3.05804 | 554 | 1.000       |
| Treatment  | 0.1   | Small      | Helpers | - Treatment | 0.1   | Large      | Female  | -18.1250   | 4.86 | -3.72860 | 543 | 0.240       |
| Treatment  | 0.1   | Small      | Helpers | - Treatment | 0.1   | Large      | Male    | -27.3750   | 4.86 | -5.63148 | 543 | < .001      |
| Treatment  | 0.1   | Small      | Helpers | - Treatment | 0.1   | Small      | Female  | 2.2917     | 5.19 | 0.44145  | 554 | 1.000       |
| Treatment  | 0.1   | Small      | Helpers | - Treatment | 0.1   | Small      | Male    | -49.7917   | 5.19 | -9.59149 | 554 | < .001      |
| Treatment  | 0.1   | Small      | Helpers | - Treatment | 24    | Large      | Female  | -15.3750   | 4.86 | -3.16289 | 543 | 1.000       |
| Treatment  | 0.1   | Small      | Helpers | - Treatment | 24    | Large      | Male    | -43.4375   | 4.86 | -8.93579 | 543 | < .001      |
| Treatment  | 0.1   | Small      | Helpers | - Treatment | 24    | Small      | Female  | -6.6250    | 5.19 | -1.27619 | 554 | 1.000       |
| Treatment  | 0.1   | Small      | Helpers | - Treatment | 24    | Small      | Helpers | -2.6250    | 5.19 | -0.50566 | 554 | 1.000       |
| Treatment  | 0.1   | Small      | Helpers | - Treatment | 24    | Small      | Male    | -29.0417   | 5.19 | -5.59437 | 554 | < .001      |
| Treatment  | 0.1   | Small      | Helpers | - Treatment | 4     | Large      | Female  | -2.3125    | 4.86 | -0.47572 | 543 | 1.000       |
| Treatment  | 0.1   | Small      | Helpers | - Treatment | 4     | Large      | Male    | -47.6250   | 4.86 | -9.79723 | 543 | < .001      |
| Treatment  | 0.1   | Small      | Helpers | - Treatment | 4     | Small      | Female  | -4.9583    | 5.19 | -0.95514 | 554 | 1.000       |
| Treatment  | 0.1   | Small      | Helpers | - Treatment | 4     | Small      | Helpers | -4.3125    | 5.19 | -0.83073 | 554 | 1.000       |
| Treatment  | 0.1   | Small      | Helpers | - Treatment | 4     | Small      | Male    | -26.8750   | 5.19 | -5.17700 | 554 | < .001      |
| Treatment  | 0.1   | Small      | Male    | - Control   | 24    | Small      | Male    | 28.5833    | 5.20 | 5.50029  | 543 | < .001      |
| Treatment  | 0.1   | Small      | Male    | - Control   | 4     | Small      | Male    | 30.0833    | 5.20 | 5.78893  | 543 | < .001      |
| Treatment  | 0.1   | Small      | Male    | - Treatment | 24    | Small      | Male    | 20.7500    | 5.19 | 3.99712  | 554 | 0.082       |
| Treatment  | 0.1   | Small      | Male    | - Treatment | 4     | Small      | Male    | 22.9167    | 5.19 | 4.41449  | 554 | 0.014       |
| Treatment  | 24    | Large      | Female  | - Control   | -0.1  | Large      | Male    | -2.2500    | 4.86 | -0.46286 | 543 | 1.000       |
| Treatment  | 24    | Large      | Female  | - Control   | -0.1  | Small      | Female  | 5.3333     | 4.86 | 1.09715  | 543 | 1.000       |
| Treatment  | 24    | Large      | Female  | - Control   | -0.1  | Small      | Male    | -4.5000    | 4.86 | -0.92572 | 543 | 1.000       |
| Treatment  | 24    | Large      | Female  | - Control   | 0.1   | Large      | Male    | -3.4167    | 4.86 | -0.70286 | 543 | 1.000       |
| Treatment  | 24    | Large      | Female  | - Control   | 0.1   | Small      | Female  | 2.6667     | 4.86 | 0.54858  | 543 | 1.000       |
| Treatment  | 24    | Large      | Female  | - Control   | 0.1   | Small      | Male    | -11.0833   | 4.86 | -2.28002 | 543 | 1.000       |
| Treatment  | 24    | Large      | Female  | - Control   | 24    | Large      | Male    | 0.3333     | 4.86 | 0.06857  | 543 | 1.000       |
| Treatment  | 24    | Large      | Female  | - Control   | 24    | Small      | Female  | 4.5833     | 4.86 | 0.94287  | 543 | 1.000       |
| Treatment  | 24    | Large      | Female  | - Control   | 24    | Small      | Male    | -5.8333    | 4.86 | -1.20001 | 543 | 1.000       |
| Treatment  | 24    | Large      | Female  | - Control   | 4     | Large      | Male    | 0.2500     | 4.86 | 0.05143  | 543 | 1.000       |
| Treatment  | 24    | Large      | Female  | - Control   | 4     | Small      | Female  | 4.5000     | 4.86 | 0.92572  | 543 | 1.000       |
| Treatment  | 24    | Large      | Female  | - Control   | 4     | Small      | Male    | -4.3333    | 4.86 | -0.89144 | 543 | 1.000       |
| Treatment  | 24    | Large      | Female  | - Treatment | -0.1  | Large      | Male    | -8.5625    | 4.50 | -1.90458 | 554 | 1.000       |
| Treatment  | 24    | Large      | Female  | - Treatment | -0.1  | Small      | Female  | 5.9167     | 4.86 | 1.21715  | 543 | 1.000       |
| Treatment  | 24    | Large      | Female  | - Treatment | -0.1  | Small      | Male    | -0.5000    | 4.86 | -0.10286 | 543 | 1.000       |
| Treatment  | 24    | Large      | Female  | - Treatment | 0.1   | Large      | Male    | -12.0000   | 4.50 | -2.66919 | 554 | 1.000       |
| Treatment  | 24    | Large      | Female  | - Treatment | 0.1   | Small      | Female  | 17.6667    | 4.86 | 3.63432  | 543 | 0.344       |
| Treatment  | 24    | Large      | Female  | - Treatment | 0.1   | Small      | Male    | -34.4167   | 4.86 | -7.08006 | 543 | < .001      |
| Treatment  | 24    | Large      | Female  | - Treatment | 24    | Large      | Male    | -28.0625   | 4.50 | -6.24202 | 554 | < .001      |
| Treatment  | 24    | Large      | Female  | - Treatment | 24    | Small      | Female  | 8.7500     | 4.86 | 1.80002  | 543 | 1.000       |
| Treatment  | 24    | Large      | Female  | - Treatment | 24    | Small      | Male    | -13.6667   | 4.86 | -2.81145 | 543 | 1.000       |
| Treatment  | 24    | Large      | Female  | - Treatment | 4     | Large      | Male    | -32.2500   | 4.50 | -7.17346 | 554 | < .001      |
| Treatment  | 24    | Large      | Female  | - Treatment | 4     | Small      | Female  | 10.4167    | 4.86 | 2.14288  | 543 | 1.000       |



Post Hoc Comparisons - Treatment \* Hours \* Group Size \* Subject

| Comparison |       |            |         |             |       |            |         |            |      |          |     |             |
|------------|-------|------------|---------|-------------|-------|------------|---------|------------|------|----------|-----|-------------|
| Treatment  | Hours | Group Size | Subject | Treatment   | Hours | Group Size | Subject | Difference | SE   | t        | df  | Pbonferroni |
| Treatment  | 24    | Large      | Female  | - Treatment | 4     | Small      | Male    | -11.5000   | 4.86 | -2.36574 | 543 | 1.000       |
| Treatment  | 24    | Large      | Helpers | - Control   | -0.1  | Large      | Female  | -10.6380   | 4.86 | -2.18841 | 543 | 1.000       |
| Treatment  | 24    | Large      | Helpers | - Control   | -0.1  | Large      | Male    | -13.7214   | 4.86 | -2.82270 | 543 | 1.000       |
| Treatment  | 24    | Large      | Helpers | - Control   | -0.1  | Small      | Female  | -6.1380    | 4.86 | -1.26269 | 543 | 1.000       |
| Treatment  | 24    | Large      | Helpers | - Control   | -0.1  | Small      | Helpers | -2.0686    | 4.86 | -0.42554 | 543 | 1.000       |
| Treatment  | 24    | Large      | Helpers | - Control   | -0.1  | Small      | Male    | -15.9714   | 4.86 | -3.28557 | 543 | 1.000       |
| Treatment  | 24    | Large      | Helpers | - Control   | 0.1   | Large      | Female  | -15.6380   | 4.86 | -3.21699 | 543 | 1.000       |
| Treatment  | 24    | Large      | Helpers | - Control   | 0.1   | Large      | Male    | -14.8880   | 4.86 | -3.06271 | 543 | 1.000       |
| Treatment  | 24    | Large      | Helpers | - Control   | 0.1   | Small      | Female  | -8.8047    | 4.86 | -1.81127 | 543 | 1.000       |
| Treatment  | 24    | Large      | Helpers | - Control   | 0.1   | Small      | Helpers | 0.4245     | 4.86 | 0.08732  | 543 | 1.000       |
| Treatment  | 24    | Large      | Helpers | - Control   | 0.1   | Small      | Male    | -22.5547   | 4.86 | -4.63986 | 543 | 0.005       |
| Treatment  | 24    | Large      | Helpers | - Control   | 24    | Large      | Female  | -12.7214   | 4.86 | -2.61699 | 543 | 1.000       |
| Treatment  | 24    | Large      | Helpers | - Control   | 24    | Large      | Male    | -11.1380   | 4.86 | -2.29127 | 543 | 1.000       |
| Treatment  | 24    | Large      | Helpers | - Control   | 24    | Small      | Female  | -6.8880    | 4.86 | -1.41698 | 543 | 1.000       |
| Treatment  | 24    | Large      | Helpers | - Control   | 24    | Small      | Helpers | -1.5061    | 4.86 | -0.30982 | 543 | 1.000       |
| Treatment  | 24    | Large      | Helpers | - Control   | 24    | Small      | Male    | -17.3047   | 4.86 | -3.55985 | 543 | 0.455       |
| Treatment  | 24    | Large      | Helpers | - Control   | 4     | Large      | Female  | -11.8880   | 4.86 | -2.44556 | 543 | 1.000       |
| Treatment  | 24    | Large      | Helpers | - Control   | 4     | Large      | Male    | -11.2214   | 4.86 | -2.30841 | 543 | 1.000       |
| Treatment  | 24    | Large      | Helpers | - Control   | 4     | Small      | Female  | -6.9714    | 4.86 | -1.43412 | 543 | 1.000       |
| Treatment  | 24    | Large      | Helpers | - Control   | 4     | Small      | Helpers | -1.8811    | 4.86 | -0.38697 | 543 | 1.000       |
| Treatment  | 24    | Large      | Helpers | - Control   | 4     | Small      | Male    | -15.8047   | 4.86 | -3.25128 | 543 | 1.000       |
| Treatment  | 24    | Large      | Helpers | - Treatment | -0.1  | Large      | Female  | -14.4714   | 4.50 | -3.21890 | 554 | 1.000       |
| Treatment  | 24    | Large      | Helpers | - Treatment | -0.1  | Large      | Male    | -20.0339   | 4.50 | -4.45618 | 554 | 0.011       |
| Treatment  | 24    | Large      | Helpers | - Treatment | -0.1  | Small      | Female  | -5.5547    | 4.86 | -1.14269 | 543 | 1.000       |
| Treatment  | 24    | Large      | Helpers | - Treatment | -0.1  | Small      | Helpers | -2.9505    | 4.86 | -0.60697 | 543 | 1.000       |
| Treatment  | 24    | Large      | Helpers | - Treatment | -0.1  | Small      | Male    | -11.9714   | 4.86 | -2.46270 | 543 | 1.000       |
| Treatment  | 24    | Large      | Helpers | - Treatment | 0.1   | Large      | Female  | -14.2214   | 4.50 | -3.16329 | 554 | 1.000       |
| Treatment  | 24    | Large      | Helpers | - Treatment | 0.1   | Large      | Male    | -23.4714   | 4.50 | -5.22080 | 554 | < .001      |
| Treatment  | 24    | Large      | Helpers | - Treatment | 0.1   | Small      | Female  | 6.1953     | 4.86 | 1.27448  | 543 | 1.000       |
| Treatment  | 24    | Large      | Helpers | - Treatment | 0.1   | Small      | Helpers | 3.9036     | 4.86 | 0.80304  | 543 | 1.000       |
| Treatment  | 24    | Large      | Helpers | - Treatment | 0.1   | Small      | Male    | -45.8880   | 4.86 | -9.43991 | 543 | < .001      |
| Treatment  | 24    | Large      | Helpers | - Treatment | 24    | Large      | Female  | -11.4714   | 4.50 | -2.55160 | 554 | 1.000       |
| Treatment  | 24    | Large      | Helpers | - Treatment | 24    | Large      | Male    | -39.5339   | 4.50 | -8.79362 | 554 | < .001      |
| Treatment  | 24    | Large      | Helpers | - Treatment | 24    | Small      | Female  | -2.7214    | 4.86 | -0.55983 | 543 | 1.000       |
| Treatment  | 24    | Large      | Helpers | - Treatment | 24    | Small      | Helpers | 1.2786     | 4.86 | 0.26304  | 543 | 1.000       |
| Treatment  | 24    | Large      | Helpers | - Treatment | 24    | Small      | Male    | -25.1380   | 4.86 | -5.17130 | 543 | < .001      |
| Treatment  | 24    | Large      | Helpers | - Treatment | 4     | Large      | Female  | 1.5911     | 4.50 | 0.35392  | 554 | 1.000       |
| Treatment  | 24    | Large      | Helpers | - Treatment | 4     | Large      | Male    | -43.7214   | 4.50 | -9.72506 | 554 | < .001      |
| Treatment  | 24    | Large      | Helpers | - Treatment | 4     | Small      | Female  | -1.0547    | 4.86 | -0.21697 | 543 | 1.000       |
| Treatment  | 24    | Large      | Helpers | - Treatment | 4     | Small      | Helpers | -0.4089    | 4.86 | -0.08411 | 543 | 1.000       |
| Treatment  | 24    | Large      | Helpers | - Treatment | 4     | Small      | Male    | -22.9714   | 4.86 | -4.72558 | 543 | 0.003       |
| Treatment  | 24    | Large      | Male    | - Control   | -0.1  | Small      | Male    | 23.5625    | 4.86 | 4.84719  | 543 | 0.002       |
| Treatment  | 24    | Large      | Male    | - Control   | 0.1   | Small      | Male    | 16.9792    | 4.86 | 3.49289  | 543 | 0.583       |
| Treatment  | 24    | Large      | Male    | - Control   | 24    | Small      | Male    | 22.2292    | 4.86 | 4.57290  | 543 | 0.007       |
| Treatment  | 24    | Large      | Male    | - Control   | 4     | Small      | Male    | 23.7292    | 4.86 | 4.88147  | 543 | 0.002       |
| Treatment  | 24    | Large      | Male    | - Treatment | -0.1  | Small      | Male    | 27.5625    | 4.86 | 5.67005  | 543 | < .001      |
| Treatment  | 24    | Large      | Male    | - Treatment | 0.1   | Small      | Male    | -6.3542    | 4.86 | -1.30715 | 543 | 1.000       |
| Treatment  | 24    | Large      | Male    | - Treatment | 24    | Small      | Male    | 14.3958    | 4.86 | 2.96146  | 543 | 1.000       |
| Treatment  | 24    | Large      | Male    | - Treatment | 4     | Small      | Male    | 16.5625    | 4.86 | 3.40717  | 543 | 0.795       |
| Treatment  | 24    | Small      | Female  | - Control   | -0.1  | Large      | Male    | -11.0000   | 5.20 | -2.11673 | 543 | 1.000       |
| Treatment  | 24    | Small      | Female  | - Control   | -0.1  | Small      | Male    | -13.2500   | 5.20 | -2.54970 | 543 | 1.000       |
| Treatment  | 24    | Small      | Female  | - Control   | 0.1   | Large      | Male    | -12.1667   | 5.20 | -2.34123 | 543 | 1.000       |
| Treatment  | 24    | Small      | Female  | - Control   | 0.1   | Small      | Male    | -19.8333   | 5.20 | -3.81652 | 543 | 0.170       |
| Treatment  | 24    | Small      | Female  | - Control   | 24    | Large      | Male    | -8.4167    | 5.20 | -1.61962 | 543 | 1.000       |
| Treatment  | 24    | Small      | Female  | - Control   | 24    | Small      | Male    | -14.5833   | 5.20 | -2.80627 | 543 | 1.000       |
| Treatment  | 24    | Small      | Female  | - Control   | 4     | Large      | Male    | -8.5000    | 5.20 | -1.63565 | 543 | 1.000       |
| Treatment  | 24    | Small      | Female  | - Control   | 4     | Small      | Male    | -13.0833   | 5.20 | -2.51762 | 543 | 1.000       |
| Treatment  | 24    | Small      | Female  | - Treatment | -0.1  | Large      | Male    | -17.3125   | 4.86 | -3.56146 | 543 | 0.453       |
| Treatment  | 24    | Small      | Female  | - Treatment | -0.1  | Small      | Male    | -9.2500    | 5.19 | -1.78185 | 554 | 1.000       |
| Treatment  | 24    | Small      | Female  | - Treatment | 0.1   | Large      | Male    | -20.7500   | 4.86 | -4.26861 | 543 | 0.026       |

Post Hoc Comparisons - Treatment \* Hours \* Group Size \* Subject

| Comparison |       |            |         |             |       |            |         |            |      |          |     |             |
|------------|-------|------------|---------|-------------|-------|------------|---------|------------|------|----------|-----|-------------|
| Treatment  | Hours | Group Size | Subject | Treatment   | Hours | Group Size | Subject | Difference | SE   | t        | df  | Pbonferroni |
| Treatment  | 24    | Small      | Female  | - Treatment | 0.1   | Small      | Male    | -43.1667   | 5.19 | -8.31530 | 554 | < .001      |
| Treatment  | 24    | Small      | Female  | - Treatment | 24    | Large      | Male    | -36.8125   | 4.86 | -7.57293 | 543 | < .001      |
| Treatment  | 24    | Small      | Female  | - Treatment | 24    | Small      | Male    | -22.4167   | 5.19 | -4.31818 | 554 | 0.021       |
| Treatment  | 24    | Small      | Female  | - Treatment | 4     | Large      | Male    | -41.0000   | 4.86 | -8.43436 | 543 | < .001      |
| Treatment  | 24    | Small      | Female  | - Treatment | 4     | Small      | Male    | -20.2500   | 5.19 | -3.90081 | 554 | 0.121       |
| Treatment  | 24    | Small      | Helpers | - Control   | -0.1  | Large      | Female  | -11.9167   | 5.20 | -2.29312 | 543 | 1.000       |
| Treatment  | 24    | Small      | Helpers | - Control   | -0.1  | Large      | Male    | -15.0000   | 5.20 | -2.88645 | 543 | 1.000       |
| Treatment  | 24    | Small      | Helpers | - Control   | -0.1  | Small      | Female  | -7.4167    | 5.20 | -1.42719 | 543 | 1.000       |
| Treatment  | 24    | Small      | Helpers | - Control   | -0.1  | Small      | Male    | -17.2500   | 5.20 | -3.31941 | 543 | 1.000       |
| Treatment  | 24    | Small      | Helpers | - Control   | 0.1   | Large      | Female  | -16.9167   | 5.20 | -3.25527 | 543 | 1.000       |
| Treatment  | 24    | Small      | Helpers | - Control   | 0.1   | Large      | Male    | -16.1667   | 5.20 | -3.11095 | 543 | 1.000       |
| Treatment  | 24    | Small      | Helpers | - Control   | 0.1   | Small      | Female  | -10.0833   | 5.20 | -1.94033 | 543 | 1.000       |
| Treatment  | 24    | Small      | Helpers | - Control   | 0.1   | Small      | Male    | -23.8333   | 5.20 | -4.58624 | 543 | 0.006       |
| Treatment  | 24    | Small      | Helpers | - Control   | 24    | Large      | Female  | -14.0000   | 5.20 | -2.69402 | 543 | 1.000       |
| Treatment  | 24    | Small      | Helpers | - Control   | 24    | Large      | Male    | -12.4167   | 5.20 | -2.38934 | 543 | 1.000       |
| Treatment  | 24    | Small      | Helpers | - Control   | 24    | Small      | Female  | -8.1667    | 5.20 | -1.57151 | 543 | 1.000       |
| Treatment  | 24    | Small      | Helpers | - Control   | 24    | Small      | Male    | -18.5833   | 5.20 | -3.57599 | 543 | 0.429       |
| Treatment  | 24    | Small      | Helpers | - Control   | 4     | Large      | Female  | -13.1667   | 5.20 | -2.53366 | 543 | 1.000       |
| Treatment  | 24    | Small      | Helpers | - Control   | 4     | Large      | Male    | -12.5000   | 5.20 | -2.40537 | 543 | 1.000       |
| Treatment  | 24    | Small      | Helpers | - Control   | 4     | Small      | Female  | -8.2500    | 5.20 | -1.58755 | 543 | 1.000       |
| Treatment  | 24    | Small      | Helpers | - Control   | 4     | Small      | Male    | -17.0833   | 5.20 | -3.28734 | 543 | 1.000       |
| Treatment  | 24    | Small      | Helpers | - Treatment | -0.1  | Large      | Female  | -15.7500   | 4.86 | -3.24003 | 543 | 1.000       |
| Treatment  | 24    | Small      | Helpers | - Treatment | -0.1  | Large      | Male    | -21.3125   | 4.86 | -4.38433 | 543 | 0.016       |
| Treatment  | 24    | Small      | Helpers | - Treatment | -0.1  | Small      | Female  | -6.8333    | 5.19 | -1.31632 | 554 | 1.000       |
| Treatment  | 24    | Small      | Helpers | - Treatment | -0.1  | Small      | Male    | -13.2500   | 5.19 | -2.55238 | 554 | 1.000       |
| Treatment  | 24    | Small      | Helpers | - Treatment | 0.1   | Large      | Female  | -15.5000   | 4.86 | -3.18860 | 543 | 1.000       |
| Treatment  | 24    | Small      | Helpers | - Treatment | 0.1   | Large      | Male    | -24.7500   | 4.86 | -5.09147 | 543 | < .001      |
| Treatment  | 24    | Small      | Helpers | - Treatment | 0.1   | Small      | Female  | 4.9167     | 5.19 | 0.94711  | 554 | 1.000       |
| Treatment  | 24    | Small      | Helpers | - Treatment | 0.1   | Small      | Male    | -47.1667   | 5.19 | -9.08583 | 554 | < .001      |
| Treatment  | 24    | Small      | Helpers | - Treatment | 24    | Large      | Female  | -12.7500   | 4.86 | -2.62288 | 543 | 1.000       |
| Treatment  | 24    | Small      | Helpers | - Treatment | 24    | Large      | Male    | -40.8125   | 4.86 | -8.39579 | 543 | < .001      |
| Treatment  | 24    | Small      | Helpers | - Treatment | 24    | Small      | Female  | -4.0000    | 5.19 | -0.77053 | 554 | 1.000       |
| Treatment  | 24    | Small      | Helpers | - Treatment | 24    | Small      | Male    | -26.4167   | 5.19 | -5.08871 | 554 | < .001      |
| Treatment  | 24    | Small      | Helpers | - Treatment | 4     | Large      | Female  | 0.3125     | 4.86 | 0.06429  | 543 | 1.000       |
| Treatment  | 24    | Small      | Helpers | - Treatment | 4     | Large      | Male    | -45.0000   | 4.86 | -9.25723 | 543 | < .001      |
| Treatment  | 24    | Small      | Helpers | - Treatment | 4     | Small      | Female  | -2.3333    | 5.19 | -0.44948 | 554 | 1.000       |
| Treatment  | 24    | Small      | Helpers | - Treatment | 4     | Small      | Male    | -24.2500   | 5.19 | -4.67134 | 554 | 0.004       |
| Treatment  | 4     | Large      | Female  | - Control   | -0.1  | Large      | Male    | -15.3125   | 4.86 | -3.15003 | 543 | 1.000       |
| Treatment  | 4     | Large      | Female  | - Control   | -0.1  | Small      | Female  | -7.7292    | 4.86 | -1.59001 | 543 | 1.000       |
| Treatment  | 4     | Large      | Female  | - Control   | -0.1  | Small      | Male    | -17.5625   | 4.86 | -3.61289 | 543 | 0.373       |
| Treatment  | 4     | Large      | Female  | - Control   | 0.1   | Large      | Male    | -16.4792   | 4.86 | -3.39003 | 543 | 0.846       |
| Treatment  | 4     | Large      | Female  | - Control   | 0.1   | Small      | Female  | -10.3958   | 4.86 | -2.13859 | 543 | 1.000       |
| Treatment  | 4     | Large      | Female  | - Control   | 0.1   | Small      | Male    | -24.1458   | 4.86 | -4.96719 | 543 | 0.001       |
| Treatment  | 4     | Large      | Female  | - Control   | 24    | Large      | Female  | -14.3125   | 4.86 | -2.94431 | 543 | 1.000       |
| Treatment  | 4     | Large      | Female  | - Control   | 24    | Large      | Male    | -12.7292   | 4.86 | -2.61859 | 543 | 1.000       |
| Treatment  | 4     | Large      | Female  | - Control   | 24    | Small      | Female  | -8.4792    | 4.86 | -1.74430 | 543 | 1.000       |
| Treatment  | 4     | Large      | Female  | - Control   | 24    | Small      | Male    | -18.8958   | 4.86 | -3.88718 | 543 | 0.129       |
| Treatment  | 4     | Large      | Female  | - Control   | 4     | Large      | Male    | -12.8125   | 4.86 | -2.63574 | 543 | 1.000       |
| Treatment  | 4     | Large      | Female  | - Control   | 4     | Small      | Female  | -8.5625    | 4.86 | -1.76144 | 543 | 1.000       |
| Treatment  | 4     | Large      | Female  | - Control   | 4     | Small      | Male    | -17.3958   | 4.86 | -3.57860 | 543 | 0.425       |
| Treatment  | 4     | Large      | Female  | - Treatment | -0.1  | Large      | Male    | -21.6250   | 4.50 | -4.81011 | 554 | 0.002       |
| Treatment  | 4     | Large      | Female  | - Treatment | -0.1  | Small      | Female  | -7.1458    | 4.86 | -1.47001 | 543 | 1.000       |
| Treatment  | 4     | Large      | Female  | - Treatment | -0.1  | Small      | Male    | -13.5625   | 4.86 | -2.79003 | 543 | 1.000       |
| Treatment  | 4     | Large      | Female  | - Treatment | 0.1   | Large      | Male    | -25.0625   | 4.50 | -5.57472 | 554 | < .001      |
| Treatment  | 4     | Large      | Female  | - Treatment | 0.1   | Small      | Female  | 4.6042     | 4.86 | 0.94715  | 543 | 1.000       |
| Treatment  | 4     | Large      | Female  | - Treatment | 0.1   | Small      | Male    | -47.4792   | 4.86 | -9.76723 | 543 | < .001      |
| Treatment  | 4     | Large      | Female  | - Treatment | 24    | Large      | Female  | -13.0625   | 4.50 | -2.90553 | 554 | 1.000       |
| Treatment  | 4     | Large      | Female  | - Treatment | 24    | Large      | Male    | -41.1250   | 4.50 | -9.14755 | 554 | < .001      |
| Treatment  | 4     | Large      | Female  | - Treatment | 24    | Small      | Female  | -4.3125    | 4.86 | -0.88715 | 543 | 1.000       |
| Treatment  | 4     | Large      | Female  | - Treatment | 24    | Small      | Male    | -26.7292   | 4.86 | -5.49862 | 543 | < .001      |

Post Hoc Comparisons - Treatment \* Hours \* Group Size \* Subject

| Comparison |       |            |         |             |       |            |         |            |      |           |     |             |
|------------|-------|------------|---------|-------------|-------|------------|---------|------------|------|-----------|-----|-------------|
| Treatment  | Hours | Group Size | Subject | Treatment   | Hours | Group Size | Subject | Difference | SE   | t         | df  | Pbonferroni |
| Treatment  | 4     | Large      | Female  | - Treatment | 4     | Large      | Male    | -45.3125   | 4.50 | -10.07898 | 554 | < .001      |
| Treatment  | 4     | Large      | Female  | - Treatment | 4     | Small      | Female  | -2.6458    | 4.86 | -0.54429  | 543 | 1.000       |
| Treatment  | 4     | Large      | Female  | - Treatment | 4     | Small      | Male    | -24.5625   | 4.86 | -5.05290  | 543 | < .001      |
| Treatment  | 4     | Large      | Helpers | - Control   | -0.1  | Large      | Female  | -9.5536    | 4.86 | -1.96532  | 543 | 1.000       |
| Treatment  | 4     | Large      | Helpers | - Control   | -0.1  | Large      | Male    | -12.6369   | 4.86 | -2.59962  | 543 | 1.000       |
| Treatment  | 4     | Large      | Helpers | - Control   | -0.1  | Small      | Female  | -5.0536    | 4.86 | -1.03960  | 543 | 1.000       |
| Treatment  | 4     | Large      | Helpers | - Control   | -0.1  | Small      | Helpers | -0.9841    | 4.86 | -0.20245  | 543 | 1.000       |
| Treatment  | 4     | Large      | Helpers | - Control   | -0.1  | Small      | Male    | -14.8869   | 4.86 | -3.06248  | 543 | 1.000       |
| Treatment  | 4     | Large      | Helpers | - Control   | 0.1   | Large      | Female  | -14.5536   | 4.86 | -2.99390  | 543 | 1.000       |
| Treatment  | 4     | Large      | Helpers | - Control   | 0.1   | Large      | Male    | -13.8036   | 4.86 | -2.83962  | 543 | 1.000       |
| Treatment  | 4     | Large      | Helpers | - Control   | 0.1   | Small      | Female  | -7.7202    | 4.86 | -1.58818  | 543 | 1.000       |
| Treatment  | 4     | Large      | Helpers | - Control   | 0.1   | Small      | Helpers | 1.5089     | 4.86 | 0.31041   | 543 | 1.000       |
| Treatment  | 4     | Large      | Helpers | - Control   | 0.1   | Small      | Male    | -21.4702   | 4.86 | -4.41677  | 543 | 0.014       |
| Treatment  | 4     | Large      | Helpers | - Control   | 24    | Large      | Female  | -11.6369   | 4.86 | -2.39390  | 543 | 1.000       |
| Treatment  | 4     | Large      | Helpers | - Control   | 24    | Large      | Helpers | -2.2089    | 4.86 | -0.45441  | 543 | 1.000       |
| Treatment  | 4     | Large      | Helpers | - Control   | 24    | Large      | Male    | -10.0536   | 4.86 | -2.06818  | 543 | 1.000       |
| Treatment  | 4     | Large      | Helpers | - Control   | 24    | Small      | Female  | -5.8036    | 4.86 | -1.19389  | 543 | 1.000       |
| Treatment  | 4     | Large      | Helpers | - Control   | 24    | Small      | Helpers | -0.4216    | 4.86 | -0.08674  | 543 | 1.000       |
| Treatment  | 4     | Large      | Helpers | - Control   | 24    | Small      | Male    | -16.2202   | 4.86 | -3.33676  | 543 | 1.000       |
| Treatment  | 4     | Large      | Helpers | - Control   | 4     | Large      | Female  | -10.8036   | 4.86 | -2.22247  | 543 | 1.000       |
| Treatment  | 4     | Large      | Helpers | - Control   | 4     | Large      | Male    | -10.1369   | 4.86 | -2.08532  | 543 | 1.000       |
| Treatment  | 4     | Large      | Helpers | - Control   | 4     | Small      | Female  | -5.8869    | 4.86 | -1.21103  | 543 | 1.000       |
| Treatment  | 4     | Large      | Helpers | - Control   | 4     | Small      | Helpers | -0.7966    | 4.86 | -0.16388  | 543 | 1.000       |
| Treatment  | 4     | Large      | Helpers | - Control   | 4     | Small      | Male    | -14.7202   | 4.86 | -3.02819  | 543 | 1.000       |
| Treatment  | 4     | Large      | Helpers | - Treatment | -0.1  | Large      | Female  | -13.3869   | 4.50 | -2.97769  | 554 | 1.000       |
| Treatment  | 4     | Large      | Helpers | - Treatment | -0.1  | Large      | Male    | -18.9494   | 4.50 | -4.21497  | 554 | 0.033       |
| Treatment  | 4     | Large      | Helpers | - Treatment | -0.1  | Small      | Female  | -4.4702    | 4.86 | -0.91960  | 543 | 1.000       |
| Treatment  | 4     | Large      | Helpers | - Treatment | -0.1  | Small      | Helpers | -1.8661    | 4.86 | -0.38388  | 543 | 1.000       |
| Treatment  | 4     | Large      | Helpers | - Treatment | -0.1  | Small      | Male    | -10.8869   | 4.86 | -2.23961  | 543 | 1.000       |
| Treatment  | 4     | Large      | Helpers | - Treatment | 0.1   | Large      | Female  | -13.1369   | 4.50 | -2.92208  | 554 | 1.000       |
| Treatment  | 4     | Large      | Helpers | - Treatment | 0.1   | Large      | Male    | -22.3869   | 4.50 | -4.97958  | 554 | < .001      |
| Treatment  | 4     | Large      | Helpers | - Treatment | 0.1   | Small      | Female  | 7.2798     | 4.86 | 1.49756   | 543 | 1.000       |
| Treatment  | 4     | Large      | Helpers | - Treatment | 0.1   | Small      | Helpers | 4.9881     | 4.86 | 1.02613   | 543 | 1.000       |
| Treatment  | 4     | Large      | Helpers | - Treatment | 0.1   | Small      | Male    | -44.8036   | 4.86 | -9.21682  | 543 | < .001      |
| Treatment  | 4     | Large      | Helpers | - Treatment | 24    | Large      | Female  | -10.3869   | 4.50 | -2.31039  | 554 | 1.000       |
| Treatment  | 4     | Large      | Helpers | - Treatment | 24    | Large      | Helpers | 1.0844     | 4.50 | 0.24122   | 554 | 1.000       |
| Treatment  | 4     | Large      | Helpers | - Treatment | 24    | Large      | Male    | -38.4494   | 4.50 | -8.55241  | 554 | < .001      |
| Treatment  | 4     | Large      | Helpers | - Treatment | 24    | Small      | Female  | -1.6369    | 4.86 | -0.33674  | 543 | 1.000       |
| Treatment  | 4     | Large      | Helpers | - Treatment | 24    | Small      | Helpers | 2.3631     | 4.86 | 0.48613   | 543 | 1.000       |
| Treatment  | 4     | Large      | Helpers | - Treatment | 24    | Small      | Male    | -24.0536   | 4.86 | -4.94821  | 543 | 0.001       |
| Treatment  | 4     | Large      | Helpers | - Treatment | 4     | Large      | Female  | 2.6756     | 4.50 | 0.59514   | 554 | 1.000       |
| Treatment  | 4     | Large      | Helpers | - Treatment | 4     | Large      | Male    | -42.6369   | 4.50 | -9.48384  | 554 | < .001      |
| Treatment  | 4     | Large      | Helpers | - Treatment | 4     | Small      | Female  | 0.0298     | 4.86 | 0.00612   | 543 | 1.000       |
| Treatment  | 4     | Large      | Helpers | - Treatment | 4     | Small      | Helpers | 0.6756     | 4.86 | 0.13898   | 543 | 1.000       |
| Treatment  | 4     | Large      | Helpers | - Treatment | 4     | Small      | Male    | -21.8869   | 4.86 | -4.50249  | 543 | 0.009       |
| Treatment  | 4     | Large      | Male    | - Control   | -0.1  | Small      | Male    | 27.7500    | 4.86 | 5.70862   | 543 | < .001      |
| Treatment  | 4     | Large      | Male    | - Control   | 0.1   | Small      | Male    | 21.1667    | 4.86 | 4.35432   | 543 | 0.018       |
| Treatment  | 4     | Large      | Male    | - Control   | 24    | Large      | Male    | 32.5833    | 4.86 | 6.70292   | 543 | < .001      |
| Treatment  | 4     | Large      | Male    | - Control   | 24    | Small      | Male    | 26.4167    | 4.86 | 5.43433   | 543 | < .001      |
| Treatment  | 4     | Large      | Male    | - Control   | 4     | Small      | Male    | 27.9167    | 4.86 | 5.74291   | 543 | < .001      |
| Treatment  | 4     | Large      | Male    | - Treatment | -0.1  | Small      | Male    | 31.7500    | 4.86 | 6.53149   | 543 | < .001      |
| Treatment  | 4     | Large      | Male    | - Treatment | 0.1   | Small      | Male    | -2.1667    | 4.86 | -0.44572  | 543 | 1.000       |
| Treatment  | 4     | Large      | Male    | - Treatment | 24    | Large      | Male    | 4.1875     | 4.50 | 0.93144   | 554 | 1.000       |
| Treatment  | 4     | Large      | Male    | - Treatment | 24    | Small      | Male    | 18.5833    | 4.86 | 3.82289   | 543 | 0.166       |
| Treatment  | 4     | Large      | Male    | - Treatment | 4     | Small      | Male    | 20.7500    | 4.86 | 4.26861   | 543 | 0.026       |
| Treatment  | 4     | Small      | Female  | - Control   | -0.1  | Large      | Male    | -12.6667   | 5.20 | -2.43744  | 543 | 1.000       |
| Treatment  | 4     | Small      | Female  | - Control   | -0.1  | Small      | Male    | -14.9167   | 5.20 | -2.87041  | 543 | 1.000       |
| Treatment  | 4     | Small      | Female  | - Control   | 0.1   | Large      | Male    | -13.8333   | 5.20 | -2.66195  | 543 | 1.000       |
| Treatment  | 4     | Small      | Female  | - Control   | 0.1   | Small      | Male    | -21.5000   | 5.20 | -4.13724  | 543 | 0.046       |
| Treatment  | 4     | Small      | Female  | - Control   | 24    | Large      | Male    | -10.0833   | 5.20 | -1.94033  | 543 | 1.000       |

Post Hoc Comparisons - Treatment \* Hours \* Group Size \* Subject

| Comparison |       |            |         |             |       |            |         |            |      |          |     |             |
|------------|-------|------------|---------|-------------|-------|------------|---------|------------|------|----------|-----|-------------|
| Treatment  | Hours | Group Size | Subject | Treatment   | Hours | Group Size | Subject | Difference | SE   | t        | df  | Pbonferroni |
| Treatment  | 4     | Small      | Female  | - Control   | 24    | Small      | Female  | -5.8333    | 5.20 | -1.12251 | 543 | 1.000       |
| Treatment  | 4     | Small      | Female  | - Control   | 24    | Small      | Male    | -16.2500   | 5.20 | -3.12698 | 543 | 1.000       |
| Treatment  | 4     | Small      | Female  | - Control   | 4     | Large      | Male    | -10.1667   | 5.20 | -1.95637 | 543 | 1.000       |
| Treatment  | 4     | Small      | Female  | - Control   | 4     | Small      | Male    | -14.7500   | 5.20 | -2.83834 | 543 | 1.000       |
| Treatment  | 4     | Small      | Female  | - Treatment | -0.1  | Large      | Male    | -18.9792   | 4.86 | -3.90432 | 543 | 0.120       |
| Treatment  | 4     | Small      | Female  | - Treatment | -0.1  | Small      | Male    | -10.9167   | 5.19 | -2.10290 | 554 | 1.000       |
| Treatment  | 4     | Small      | Female  | - Treatment | 0.1   | Large      | Male    | -22.4167   | 4.86 | -4.61147 | 543 | 0.006       |
| Treatment  | 4     | Small      | Female  | - Treatment | 0.1   | Small      | Male    | -44.8333   | 5.19 | -8.63635 | 554 | < .001      |
| Treatment  | 4     | Small      | Female  | - Treatment | 24    | Large      | Male    | -38.4792   | 4.86 | -7.91579 | 543 | < .001      |
| Treatment  | 4     | Small      | Female  | - Treatment | 24    | Small      | Female  | -1.6667    | 5.19 | -0.32105 | 554 | 1.000       |
| Treatment  | 4     | Small      | Female  | - Treatment | 24    | Small      | Male    | -24.0833   | 5.19 | -4.63923 | 554 | 0.005       |
| Treatment  | 4     | Small      | Female  | - Treatment | 4     | Large      | Male    | -42.6667   | 4.86 | -8.77722 | 543 | < .001      |
| Treatment  | 4     | Small      | Female  | - Treatment | 4     | Small      | Male    | -21.9167   | 5.19 | -4.22186 | 554 | 0.032       |
| Treatment  | 4     | Small      | Helpers | - Control   | -0.1  | Large      | Female  | -10.2292   | 5.20 | -1.96840 | 543 | 1.000       |
| Treatment  | 4     | Small      | Helpers | - Control   | -0.1  | Large      | Male    | -13.3125   | 5.20 | -2.56172 | 543 | 1.000       |
| Treatment  | 4     | Small      | Helpers | - Control   | -0.1  | Small      | Female  | -5.7292    | 5.20 | -1.10246 | 543 | 1.000       |
| Treatment  | 4     | Small      | Helpers | - Control   | -0.1  | Small      | Male    | -15.5625   | 5.20 | -2.99469 | 543 | 1.000       |
| Treatment  | 4     | Small      | Helpers | - Control   | 0.1   | Large      | Female  | -15.2292   | 5.20 | -2.93055 | 543 | 1.000       |
| Treatment  | 4     | Small      | Helpers | - Control   | 0.1   | Large      | Male    | -14.4792   | 5.20 | -2.78622 | 543 | 1.000       |
| Treatment  | 4     | Small      | Helpers | - Control   | 0.1   | Small      | Female  | -8.3958    | 5.20 | -1.61561 | 543 | 1.000       |
| Treatment  | 4     | Small      | Helpers | - Control   | 0.1   | Small      | Male    | -22.1458   | 5.20 | -4.26152 | 543 | 0.027       |
| Treatment  | 4     | Small      | Helpers | - Control   | 24    | Large      | Female  | -12.3125   | 5.20 | -2.36929 | 543 | 1.000       |
| Treatment  | 4     | Small      | Helpers | - Control   | 24    | Large      | Male    | -10.7292   | 5.20 | -2.06461 | 543 | 1.000       |
| Treatment  | 4     | Small      | Helpers | - Control   | 24    | Small      | Female  | -6.4792    | 5.20 | -1.24678 | 543 | 1.000       |
| Treatment  | 4     | Small      | Helpers | - Control   | 24    | Small      | Helpers | -1.0972    | 5.20 | -0.21114 | 543 | 1.000       |
| Treatment  | 4     | Small      | Helpers | - Control   | 24    | Small      | Male    | -16.8958   | 5.20 | -3.25126 | 543 | 1.000       |
| Treatment  | 4     | Small      | Helpers | - Control   | 4     | Large      | Female  | -11.4792   | 5.20 | -2.20893 | 543 | 1.000       |
| Treatment  | 4     | Small      | Helpers | - Control   | 4     | Large      | Male    | -10.8125   | 5.20 | -2.08065 | 543 | 1.000       |
| Treatment  | 4     | Small      | Helpers | - Control   | 4     | Small      | Female  | -6.5625    | 5.20 | -1.26282 | 543 | 1.000       |
| Treatment  | 4     | Small      | Helpers | - Control   | 4     | Small      | Male    | -15.3958   | 5.20 | -2.96262 | 543 | 1.000       |
| Treatment  | 4     | Small      | Helpers | - Treatment | -0.1  | Large      | Female  | -14.0625   | 4.86 | -2.89288 | 543 | 1.000       |
| Treatment  | 4     | Small      | Helpers | - Treatment | -0.1  | Large      | Male    | -19.6250   | 4.86 | -4.03718 | 543 | 0.070       |
| Treatment  | 4     | Small      | Helpers | - Treatment | -0.1  | Small      | Female  | -5.1458    | 5.19 | -0.99125 | 554 | 1.000       |
| Treatment  | 4     | Small      | Helpers | - Treatment | -0.1  | Small      | Male    | -11.5625   | 5.19 | -2.22731 | 554 | 1.000       |
| Treatment  | 4     | Small      | Helpers | - Treatment | 0.1   | Large      | Female  | -13.8125   | 4.86 | -2.84145 | 543 | 1.000       |
| Treatment  | 4     | Small      | Helpers | - Treatment | 0.1   | Large      | Male    | -23.0625   | 4.86 | -4.74433 | 543 | 0.003       |
| Treatment  | 4     | Small      | Helpers | - Treatment | 0.1   | Small      | Female  | 6.6042     | 5.19 | 1.27218  | 554 | 1.000       |
| Treatment  | 4     | Small      | Helpers | - Treatment | 0.1   | Small      | Male    | -45.4792   | 5.19 | -8.76076 | 554 | < .001      |
| Treatment  | 4     | Small      | Helpers | - Treatment | 24    | Large      | Female  | -11.0625   | 4.86 | -2.27573 | 543 | 1.000       |
| Treatment  | 4     | Small      | Helpers | - Treatment | 24    | Large      | Male    | -39.1250   | 4.86 | -8.04864 | 543 | < .001      |
| Treatment  | 4     | Small      | Helpers | - Treatment | 24    | Small      | Female  | -2.3125    | 5.19 | -0.44546 | 554 | 1.000       |
| Treatment  | 4     | Small      | Helpers | - Treatment | 24    | Small      | Helpers | 1.6875     | 5.19 | 0.32507  | 554 | 1.000       |
| Treatment  | 4     | Small      | Helpers | - Treatment | 24    | Small      | Male    | -24.7292   | 5.19 | -4.76364 | 554 | 0.003       |
| Treatment  | 4     | Small      | Helpers | - Treatment | 4     | Large      | Female  | 2.0000     | 4.86 | 0.41143  | 543 | 1.000       |
| Treatment  | 4     | Small      | Helpers | - Treatment | 4     | Large      | Male    | -43.3125   | 4.86 | -8.91008 | 543 | < .001      |
| Treatment  | 4     | Small      | Helpers | - Treatment | 4     | Small      | Female  | -0.6458    | 5.19 | -0.12441 | 554 | 1.000       |
| Treatment  | 4     | Small      | Helpers | - Treatment | 4     | Small      | Male    | -22.5625   | 5.19 | -4.34627 | 554 | 0.019       |
| Treatment  | 4     | Small      | Male    | - Control   | 24    | Small      | Male    | 5.6667     | 5.20 | 1.09044  | 543 | 1.000       |
| Treatment  | 4     | Small      | Male    | - Treatment | 24    | Small      | Male    | -2.1667    | 5.19 | -0.41737 | 554 | 1.000       |

Table S2. Post Hoc Comparisons- Group Size \* Treatment \* Hours

|            |           | Comparison |            |           |           |      | Difference | SE    | t        | df    | Pbonferroni |
|------------|-----------|------------|------------|-----------|-----------|------|------------|-------|----------|-------|-------------|
| Group Size | Treatment | Hours      | Group Size | Treatment | Hours     |      |            |       |          |       |             |
| Large      | Control   | -0.1       | -          | Large     | Control   | 0.1  | 0.17470    | 0.255 | 0.68563  | 580.0 | 1.000       |
| Large      | Control   | -0.1       | -          | Large     | Control   | 24   | 0.04851    | 0.255 | 0.19039  | 580.0 | 1.000       |
| Large      | Control   | -0.1       | -          | Large     | Control   | 4    | -0.01349   | 0.255 | -0.05295 | 580.0 | 1.000       |
| Large      | Control   | -0.1       | -          | Large     | Treatment | 0.1  | -0.59720   | 0.288 | -2.07492 | 89.5  | 1.000       |
| Large      | Control   | -0.1       | -          | Large     | Treatment | 24   | -0.70942   | 0.288 | -2.46485 | 89.5  | 1.000       |
| Large      | Control   | -0.1       | -          | Large     | Treatment | 4    | -0.32488   | 0.288 | -1.12876 | 89.5  | 1.000       |
| Large      | Control   | -0.1       | -          | Small     | Control   | 0.1  | -0.09683   | 0.308 | -0.31469 | 89.5  | 1.000       |
| Large      | Control   | -0.1       | -          | Small     | Control   | 24   | -0.08757   | 0.308 | -0.28459 | 89.5  | 1.000       |
| Large      | Control   | -0.1       | -          | Small     | Control   | 4    | -0.20099   | 0.308 | -0.65323 | 89.5  | 1.000       |
| Large      | Control   | -0.1       | -          | Small     | Treatment | 0.1  | 0.17401    | 0.308 | 0.56553  | 89.5  | 1.000       |
| Large      | Control   | -0.1       | -          | Small     | Treatment | 24   | -0.49266   | 0.308 | -1.60116 | 89.5  | 1.000       |
| Large      | Control   | -0.1       | -          | Small     | Treatment | 4    | -0.22183   | 0.308 | -0.72094 | 89.5  | 1.000       |
| Large      | Control   | 0.1        | -          | Large     | Control   | 24   | -0.12619   | 0.255 | -0.49524 | 580.0 | 1.000       |
| Large      | Control   | 0.1        | -          | Large     | Control   | 4    | -0.18819   | 0.255 | -0.73858 | 580.0 | 1.000       |
| Large      | Control   | 0.1        | -          | Large     | Treatment | 24   | -0.88413   | 0.288 | -3.07184 | 89.5  | 0.338       |
| Large      | Control   | 0.1        | -          | Large     | Treatment | 4    | -0.49958   | 0.288 | -1.73575 | 89.5  | 1.000       |
| Large      | Control   | 0.1        | -          | Small     | Control   | 24   | -0.26227   | 0.308 | -0.85238 | 89.5  | 1.000       |
| Large      | Control   | 0.1        | -          | Small     | Control   | 4    | -0.37569   | 0.308 | -1.22102 | 89.5  | 1.000       |
| Large      | Control   | 0.1        | -          | Small     | Treatment | 24   | -0.66736   | 0.308 | -2.16895 | 89.5  | 1.000       |
| Large      | Control   | 0.1        | -          | Small     | Treatment | 4    | -0.39653   | 0.308 | -1.28873 | 89.5  | 1.000       |
| Large      | Control   | 4          | -          | Large     | Control   | 24   | 0.06200    | 0.255 | 0.24334  | 580.0 | 1.000       |
| Large      | Control   | 4          | -          | Large     | Treatment | 24   | -0.69593   | 0.288 | -2.41797 | 89.5  | 1.000       |
| Large      | Control   | 4          | -          | Small     | Control   | 24   | -0.07407   | 0.308 | -0.24074 | 89.5  | 1.000       |
| Large      | Control   | 4          | -          | Small     | Treatment | 24   | -0.47917   | 0.308 | -1.55731 | 89.5  | 1.000       |
| Large      | Treatment | -0.1       | -          | Large     | Control   | -0.1 | -0.14549   | 0.288 | -0.50548 | 89.5  | 1.000       |
| Large      | Treatment | -0.1       | -          | Large     | Control   | 0.1  | 0.02922    | 0.288 | 0.10151  | 89.5  | 1.000       |
| Large      | Treatment | -0.1       | -          | Large     | Control   | 24   | -0.09697   | 0.288 | -0.33693 | 89.5  | 1.000       |
| Large      | Treatment | -0.1       | -          | Large     | Control   | 4    | -0.15898   | 0.288 | -0.55236 | 89.5  | 1.000       |
| Large      | Treatment | -0.1       | -          | Large     | Treatment | 0.1  | -0.74268   | 0.221 | -3.36561 | 580.0 | 0.098       |
| Large      | Treatment | -0.1       | -          | Large     | Treatment | 24   | -0.85491   | 0.221 | -3.87419 | 580.0 | 0.014       |
| Large      | Treatment | -0.1       | -          | Large     | Treatment | 4    | -0.47036   | 0.221 | -2.13153 | 580.0 | 1.000       |
| Large      | Treatment | -0.1       | -          | Small     | Control   | -0.1 | -0.16824   | 0.288 | -0.58453 | 89.5  | 1.000       |
| Large      | Treatment | -0.1       | -          | Small     | Control   | 0.1  | -0.24231   | 0.288 | -0.84190 | 89.5  | 1.000       |
| Large      | Treatment | -0.1       | -          | Small     | Control   | 24   | -0.23305   | 0.288 | -0.80973 | 89.5  | 1.000       |
| Large      | Treatment | -0.1       | -          | Small     | Control   | 4    | -0.34648   | 0.288 | -1.20382 | 89.5  | 1.000       |
| Large      | Treatment | -0.1       | -          | Small     | Treatment | 0.1  | 0.02852    | 0.288 | 0.09910  | 89.5  | 1.000       |
| Large      | Treatment | -0.1       | -          | Small     | Treatment | 24   | -0.63814   | 0.288 | -2.21719 | 89.5  | 1.000       |
| Large      | Treatment | -0.1       | -          | Small     | Treatment | 4    | -0.36731   | 0.288 | -1.27620 | 89.5  | 1.000       |
| Large      | Treatment | 0.1        | -          | Large     | Control   | 0.1  | 0.77190    | 0.288 | 2.68192  | 89.5  | 1.000       |
| Large      | Treatment | 0.1        | -          | Large     | Control   | 24   | 0.64571    | 0.288 | 2.24348  | 89.5  | 1.000       |
| Large      | Treatment | 0.1        | -          | Large     | Control   | 4    | 0.58371    | 0.288 | 2.02805  | 89.5  | 1.000       |
| Large      | Treatment | 0.1        | -          | Large     | Treatment | 24   | -0.11223   | 0.221 | -0.50858 | 580.0 | 1.000       |
| Large      | Treatment | 0.1        | -          | Large     | Treatment | 4    | 0.27232    | 0.221 | 1.23408  | 580.0 | 1.000       |
| Large      | Treatment | 0.1        | -          | Small     | Control   | 0.1  | 0.50037    | 0.288 | 1.73851  | 89.5  | 1.000       |
| Large      | Treatment | 0.1        | -          | Small     | Control   | 24   | 0.50963    | 0.288 | 1.77068  | 89.5  | 1.000       |
| Large      | Treatment | 0.1        | -          | Small     | Control   | 4    | 0.39621    | 0.288 | 1.37659  | 89.5  | 1.000       |
| Large      | Treatment | 0.1        | -          | Small     | Treatment | 24   | 0.10454    | 0.288 | 0.36321  | 89.5  | 1.000       |
| Large      | Treatment | 0.1        | -          | Small     | Treatment | 4    | 0.37537    | 0.288 | 1.30421  | 89.5  | 1.000       |
| Large      | Treatment | 24         | -          | Large     | Control   | 24   | 0.75794    | 0.288 | 2.63340  | 89.5  | 1.000       |
| Large      | Treatment | 24         | -          | Small     | Control   | 24   | 0.62186    | 0.288 | 2.16061  | 89.5  | 1.000       |

Post Hoc Comparisons - Group Size \* Treatment \* Hours

| Comparison |           |       |   |            |           |       |            |       |          |       |             |
|------------|-----------|-------|---|------------|-----------|-------|------------|-------|----------|-------|-------------|
| Group Size | Treatment | Hours |   | Group Size | Treatment | Hours | Difference | SE    | t        | df    | Pbonferroni |
| Large      | Treatment | 4     | - | Large      | Control   | 24    | 0.37339    | 0.288 | 1.29731  | 89.5  | 1.000       |
| Large      | Treatment | 4     | - | Large      | Control   | 4     | 0.31138    | 0.288 | 1.08188  | 89.5  | 1.000       |
| Large      | Treatment | 4     | - | Large      | Treatment | 24    | -0.38455   | 0.221 | -1.74265 | 580.0 | 1.000       |
| Large      | Treatment | 4     | - | Small      | Control   | 24    | 0.23731    | 0.288 | 0.82452  | 89.5  | 1.000       |
| Large      | Treatment | 4     | - | Small      | Control   | 4     | 0.12388    | 0.288 | 0.43043  | 89.5  | 1.000       |
| Large      | Treatment | 4     | - | Small      | Treatment | 24    | -0.16778   | 0.288 | -0.58295 | 89.5  | 1.000       |
| Small      | Control   | -0.1  | - | Large      | Control   | -0.1  | 0.02275    | 0.308 | 0.07394  | 89.5  | 1.000       |
| Small      | Control   | -0.1  | - | Large      | Control   | 0.1   | 0.19745    | 0.308 | 0.64173  | 89.5  | 1.000       |
| Small      | Control   | -0.1  | - | Large      | Control   | 24    | 0.07126    | 0.308 | 0.23161  | 89.5  | 1.000       |
| Small      | Control   | -0.1  | - | Large      | Control   | 4     | 0.00926    | 0.308 | 0.03009  | 89.5  | 1.000       |
| Small      | Control   | -0.1  | - | Large      | Treatment | 0.1   | -0.57445   | 0.288 | -1.99588 | 89.5  | 1.000       |
| Small      | Control   | -0.1  | - | Large      | Treatment | 24    | -0.68667   | 0.288 | -2.38580 | 89.5  | 1.000       |
| Small      | Control   | -0.1  | - | Large      | Treatment | 4     | -0.30212   | 0.288 | -1.04971 | 89.5  | 1.000       |
| Small      | Control   | -0.1  | - | Small      | Control   | 0.1   | -0.07407   | 0.255 | -0.29071 | 580.0 | 1.000       |
| Small      | Control   | -0.1  | - | Small      | Control   | 24    | -0.06481   | 0.255 | -0.25437 | 580.0 | 1.000       |
| Small      | Control   | -0.1  | - | Small      | Control   | 4     | -0.17824   | 0.255 | -0.69952 | 580.0 | 1.000       |
| Small      | Control   | -0.1  | - | Small      | Treatment | 0.1   | 0.19676    | 0.308 | 0.63948  | 89.5  | 1.000       |
| Small      | Control   | -0.1  | - | Small      | Treatment | 24    | -0.46991   | 0.308 | -1.52722 | 89.5  | 1.000       |
| Small      | Control   | -0.1  | - | Small      | Treatment | 4     | -0.19907   | 0.308 | -0.64700 | 89.5  | 1.000       |
| Small      | Control   | 0.1   | - | Large      | Control   | 0.1   | 0.27153    | 0.308 | 0.88248  | 89.5  | 1.000       |
| Small      | Control   | 0.1   | - | Large      | Control   | 24    | 0.14534    | 0.308 | 0.47235  | 89.5  | 1.000       |
| Small      | Control   | 0.1   | - | Large      | Control   | 4     | 0.08333    | 0.308 | 0.27084  | 89.5  | 1.000       |
| Small      | Control   | 0.1   | - | Large      | Treatment | 24    | -0.61260   | 0.288 | -2.12844 | 89.5  | 1.000       |
| Small      | Control   | 0.1   | - | Large      | Treatment | 4     | -0.22805   | 0.288 | -0.79235 | 89.5  | 1.000       |
| Small      | Control   | 0.1   | - | Small      | Control   | 24    | 0.00926    | 0.255 | 0.03634  | 580.0 | 1.000       |
| Small      | Control   | 0.1   | - | Small      | Control   | 4     | -0.10417   | 0.255 | -0.40881 | 580.0 | 1.000       |
| Small      | Control   | 0.1   | - | Small      | Treatment | 24    | -0.39583   | 0.308 | -1.28647 | 89.5  | 1.000       |
| Small      | Control   | 0.1   | - | Small      | Treatment | 4     | -0.12500   | 0.308 | -0.40625 | 89.5  | 1.000       |
| Small      | Control   | 24    | - | Large      | Control   | 24    | 0.13608    | 0.308 | 0.44226  | 89.5  | 1.000       |
| Small      | Control   | 4     | - | Large      | Control   | 24    | 0.24950    | 0.308 | 0.81090  | 89.5  | 1.000       |
| Small      | Control   | 4     | - | Large      | Control   | 4     | 0.18750    | 0.308 | 0.60938  | 89.5  | 1.000       |
| Small      | Control   | 4     | - | Large      | Treatment | 24    | -0.50843   | 0.288 | -1.76652 | 89.5  | 1.000       |
| Small      | Control   | 4     | - | Small      | Control   | 24    | 0.11343    | 0.255 | 0.44515  | 580.0 | 1.000       |
| Small      | Control   | 4     | - | Small      | Treatment | 24    | -0.29167   | 0.308 | -0.94793 | 89.5  | 1.000       |
| Small      | Treatment | -0.1  | - | Large      | Control   | -0.1  | 0.24960    | 0.308 | 0.81122  | 89.5  | 1.000       |
| Small      | Treatment | -0.1  | - | Large      | Control   | 0.1   | 0.42431    | 0.308 | 1.37901  | 89.5  | 1.000       |
| Small      | Treatment | -0.1  | - | Large      | Control   | 24    | 0.29812    | 0.308 | 0.96889  | 89.5  | 1.000       |
| Small      | Treatment | -0.1  | - | Large      | Control   | 4     | 0.23611    | 0.308 | 0.76737  | 89.5  | 1.000       |
| Small      | Treatment | -0.1  | - | Large      | Treatment | -0.1  | 0.39509    | 0.288 | 1.37271  | 89.5  | 1.000       |
| Small      | Treatment | -0.1  | - | Large      | Treatment | 0.1   | -0.34759   | 0.288 | -1.20769 | 89.5  | 1.000       |
| Small      | Treatment | -0.1  | - | Large      | Treatment | 24    | -0.45982   | 0.288 | -1.59762 | 89.5  | 1.000       |
| Small      | Treatment | -0.1  | - | Large      | Treatment | 4     | -0.07527   | 0.288 | -0.26153 | 89.5  | 1.000       |
| Small      | Treatment | -0.1  | - | Small      | Control   | -0.1  | 0.22685    | 0.308 | 0.73728  | 89.5  | 1.000       |
| Small      | Treatment | -0.1  | - | Small      | Control   | 0.1   | 0.15278    | 0.308 | 0.49653  | 89.5  | 1.000       |
| Small      | Treatment | -0.1  | - | Small      | Control   | 24    | 0.16204    | 0.308 | 0.52663  | 89.5  | 1.000       |
| Small      | Treatment | -0.1  | - | Small      | Control   | 4     | 0.04861    | 0.308 | 0.15799  | 89.5  | 1.000       |
| Small      | Treatment | -0.1  | - | Small      | Treatment | 0.1   | 0.42361    | 0.255 | 1.66248  | 580.0 | 1.000       |
| Small      | Treatment | -0.1  | - | Small      | Treatment | 24    | -0.24306   | 0.255 | -0.95388 | 580.0 | 1.000       |
| Small      | Treatment | -0.1  | - | Small      | Treatment | 4     | 0.02778    | 0.255 | 0.10902  | 580.0 | 1.000       |
| Small      | Treatment | 0.1   | - | Large      | Control   | 0.1   | 6.94e-4    | 0.308 | 0.00226  | 89.5  | 1.000       |
| Small      | Treatment | 0.1   | - | Large      | Control   | 24    | -0.12550   | 0.308 | -0.40787 | 89.5  | 1.000       |
| Small      | Treatment | 0.1   | - | Large      | Control   | 4     | -0.18750   | 0.308 | -0.60938 | 89.5  | 1.000       |

Post Hoc Comparisons - Group Size \* Treatment \* Hours

| Comparison |           |       |   |            |           |       |            |       |          |       |             |
|------------|-----------|-------|---|------------|-----------|-------|------------|-------|----------|-------|-------------|
| Group Size | Treatment | Hours |   | Group Size | Treatment | Hours | Difference | SE    | t        | df    | Pbonferroni |
| Small      | Treatment | 0.1   | - | Large      | Treatment | 0.1   | -0.77121   | 0.288 | -2.67950 | 89.5  | 1.000       |
| Small      | Treatment | 0.1   | - | Large      | Treatment | 24    | -0.88343   | 0.288 | -3.06943 | 89.5  | 0.341       |
| Small      | Treatment | 0.1   | - | Large      | Treatment | 4     | -0.49888   | 0.288 | -1.73334 | 89.5  | 1.000       |
| Small      | Treatment | 0.1   | - | Small      | Control   | 0.1   | -0.27083   | 0.308 | -0.88022 | 89.5  | 1.000       |
| Small      | Treatment | 0.1   | - | Small      | Control   | 24    | -0.26157   | 0.308 | -0.85013 | 89.5  | 1.000       |
| Small      | Treatment | 0.1   | - | Small      | Control   | 4     | -0.37500   | 0.308 | -1.21876 | 89.5  | 1.000       |
| Small      | Treatment | 0.1   | - | Small      | Treatment | 24    | -0.66667   | 0.255 | -2.61637 | 580.0 | 1.000       |
| Small      | Treatment | 0.1   | - | Small      | Treatment | 4     | -0.39583   | 0.255 | -1.55347 | 580.0 | 1.000       |
| Small      | Treatment | 24    | - | Large      | Control   | 24    | 0.54117    | 0.308 | 1.75883  | 89.5  | 1.000       |
| Small      | Treatment | 24    | - | Large      | Treatment | 24    | -0.21677   | 0.288 | -0.75314 | 89.5  | 1.000       |
| Small      | Treatment | 24    | - | Small      | Control   | 24    | 0.40509    | 0.308 | 1.31657  | 89.5  | 1.000       |
| Small      | Treatment | 4     | - | Large      | Control   | 24    | 0.27034    | 0.308 | 0.87861  | 89.5  | 1.000       |
| Small      | Treatment | 4     | - | Large      | Control   | 4     | 0.20833    | 0.308 | 0.67709  | 89.5  | 1.000       |
| Small      | Treatment | 4     | - | Large      | Treatment | 24    | -0.48760   | 0.288 | -1.69413 | 89.5  | 1.000       |
| Small      | Treatment | 4     | - | Large      | Treatment | 4     | -0.10305   | 0.288 | -0.35804 | 89.5  | 1.000       |
| Small      | Treatment | 4     | - | Small      | Control   | 24    | 0.13426    | 0.308 | 0.43635  | 89.5  | 1.000       |
| Small      | Treatment | 4     | - | Small      | Control   | 4     | 0.02083    | 0.308 | 0.06771  | 89.5  | 1.000       |
| Small      | Treatment | 4     | - | Small      | Treatment | 24    | -0.27083   | 0.255 | -1.06290 | 580.0 | 1.000       |

Table S3. Readme file. Behavioral data was collected in McMaster University's Animal Behaviour Ecology Laboratory (ABEL) from February 29, 2019 to March 2, 2020. Video recordings were scored from March 13, 2019 to June 6, 2019. Tissue samples were collected March 3, 2019 and assays were conducted from June 11, 2019 to June 20. All the data for this paper was analyzed from June 27, 2019 to September 16, 2019.

The dataset (Dataset 1) is contained in an Excel worksheet organized by columns. The column labels (variables of interest) and how this data was scored are as follows:

| Labels           | Factor Values                                                                                  | Meaning                                                                                                                                                                                                                                                                                                                                                                                                                                                                                                                                                                                                                                                                                                                                         |
|------------------|------------------------------------------------------------------------------------------------|-------------------------------------------------------------------------------------------------------------------------------------------------------------------------------------------------------------------------------------------------------------------------------------------------------------------------------------------------------------------------------------------------------------------------------------------------------------------------------------------------------------------------------------------------------------------------------------------------------------------------------------------------------------------------------------------------------------------------------------------------|
| Tank Number_n    | 1-2, 4-13, 15-16, 18-19, 22, 24-31, 34                                                         | Tank ID                                                                                                                                                                                                                                                                                                                                                                                                                                                                                                                                                                                                                                                                                                                                         |
| Group Size       | Small, Large                                                                                   | Binary categorization of group size, with groups either being Small (containing 4 or fewer Helper Fish) or Large (containing 5 or greater Helper Fish).                                                                                                                                                                                                                                                                                                                                                                                                                                                                                                                                                                                         |
| Treatment        | Treatment, Control                                                                             | Binary categorization of treatment type.                                                                                                                                                                                                                                                                                                                                                                                                                                                                                                                                                                                                                                                                                                        |
| Subject          | Breeding Male, Breeding Female, Helpers                                                        | Fish class, being Breeding Male (the dominant male of the group), Breeding Female (the dominant female of the group) or Helpers (all of the remaining fish, collectively).                                                                                                                                                                                                                                                                                                                                                                                                                                                                                                                                                                      |
| Observation Type | Pre 1, Pre 2, Post 1, Post 2, 4 Hours Post 1, 4 Hours Post 2, 24 Hours Post 1, 24 Hours Post 2 | The time step of the observation. The time steps listed are: Pre 1 (recording occurred immediately before the first social perturbation), Pre 2 (recording occurred immediately before the second social perturbation), Post 1 (recording occurred immediately after the first social perturbation), Post 2 (recording occurred immediately after the second social perturbation), 4 Hours Post 1 (recording occurred 4 hours following the first social perturbation), 4 Hours Post 2 (recording occurred 4 hours following the second social perturbation), 24 Hours Post 1 (recording occurred 24 hours following the first social perturbation) and 24 Hours Post 2 (recording occurred 24 hours following the second social perturbation). |
| Male_ID          | A letter/integer combination                                                                   | A unique combination of a letter and number that identifies each male. The                                                                                                                                                                                                                                                                                                                                                                                                                                                                                                                                                                                                                                                                      |



|                           |                    |                                                                                                                                                                                                                                                               |
|---------------------------|--------------------|---------------------------------------------------------------------------------------------------------------------------------------------------------------------------------------------------------------------------------------------------------------|
|                           |                    | number indicates the tank the male started in at the beginning of the experiment.                                                                                                                                                                             |
| Helper #_n                | Range: 1-8         | The number of helpers within the group during experimental treatments.                                                                                                                                                                                        |
| Trial #_n                 | 1, 2               | The observation block, being either 1 (associated with the first social perturbation) or 2 (associated with the second social perturbation).                                                                                                                  |
| Hours                     | -0.1, 0.1, 4, 24   | The number of hours before or after the social perturbation the observation occurred, being -0.1 (immediately before the perturbation), 0.1 (immediately after the perturbation), 4 (4 hours after the perturbation) or 24 (24 hours after the perturbation). |
| Agg_direct                | Continuous integer | Aggressive acts by the focal fish toward another subject, including both other fish in the social group and its own reflection. Was not used in the calculation of Dominance Index.                                                                           |
| Agg_direct_nomirror       | Continuous integer | Aggressive acts by the focal fish toward another fish. Excludes aggressive acts toward reflections. Was used in the calculation of Dominance Index.                                                                                                           |
| Social_direct             | Continuous integer | Affiliative acts performed by the focal fish to another fish.                                                                                                                                                                                                 |
| Sub_direct                | Continuous integer | Submissive acts by the focal fish toward another subject, including both other fish and reflections.                                                                                                                                                          |
| Agg_rec                   | Continuous integer | Aggressive acts received by the focal fish from another fish.                                                                                                                                                                                                 |
| Social_rec                | Continuous integer | Affiliative acts received by the focal fish from another fish.                                                                                                                                                                                                |
| Sub_rec                   | Continuous integer | Submissive acts received by the focal fish from another fish.                                                                                                                                                                                                 |
| Self_Maintenance          | Continuous integer | Personal maintenance behaviors performed by the fish, including the initiation of swimming, remaining still, yawning etc. Not used in any of the analysis.                                                                                                    |
| Territorial Maintenance_n | Continuous integer | Behaviors performed by the focal fish in the maintenance of the group's territory.                                                                                                                                                                            |
| Still Duration (s)        | Continuous         | The duration of time (in seconds) that the focal fish was still (no active locomotion). Does not include time when the fish was not visible to the observer. Was not recorded for helpers.                                                                    |

|                                    |                    |                                                                                                                                                                                                                                            |
|------------------------------------|--------------------|--------------------------------------------------------------------------------------------------------------------------------------------------------------------------------------------------------------------------------------------|
| Swim Duration (s)                  | Continuous         | The duration of time (in seconds) that the focal fish was actively swimming. Does not include time when the fish was not visible to the observer. Was not recorded for helpers.                                                            |
| Activity                           | Continuous         | Calculated by dividing the total time the focal fish was observed swimming in an observation over the total time the fish was observed swimming or still:<br>Swim Duration / (Swim Duration + Still Duration)<br>Not relevant for helpers. |
| Dominance_Index                    | Continuous Integer | (Sum of aggressive acts given + sum of submissive acts received) – (sum of aggressive acts received + sum of submissive acts given) (Aubin-Horth et al., 2007)<br>Does not include acts toward reflections.                                |
| Dominance per capita for helpers   | Continuous         | Only relevant for helpers. The dominance index divided by the number of helpers in the group.                                                                                                                                              |
| Co-op per capita for helpers       |                    | Only relevant for helpers. The territorial maintenance actions divided by the number of helpers in the group.                                                                                                                              |
| Affiliation per capita for helpers |                    | Only relevant for helpers. The affiliation index divided by the number of helpers in the group.                                                                                                                                            |
